# Supplementary material for: Metal-free aminofluorination of α-diazo 2H-benzopyran-4-one: convenient access to β-fluoramides
Source: Royal Society of Chemistry journal article supplement (doi:10.1039/d2ob01089e), 2022-01-01
Supplement: d2ob01089e1.pdf [file d2ob01089e1.pdf]

## Supporting Information

# Metal-free aminofluorination of $\alpha$ -diazo 2H-benzopyran-4-one: Convenient access to $\beta$ -fluoramides

Wentao Zhang<sup>b</sup>, Minghao Sun<sup>a</sup>, Kejia You<sup>a</sup>, Yunfei Pang<sup>a</sup> and Baochun Ma<sup>\*a</sup>

<sup>a</sup>State Key Laboratory of Applied Organic Chemistry, Lanzhou University, Lanzhou 730000, China.

<sup>b</sup>Northwest Institute of Eco-Environment and Resources, Chinese Academy of Sciences, Lanzhou 730000, China

\*E-mail: [mabaochun@lzu.edu.cn](mailto:mabaochun@lzu.edu.cn)

## Table of Contents

|                                                                                 |    |
|---------------------------------------------------------------------------------|----|
| General Information .....                                                       | 1  |
| Experimental Procedures .....                                                   | 1  |
| Characterization Data for Products.....                                         | 3  |
| Theoretical section.....                                                        | 13 |
| Absolute Configuration and X-Ray Analysis Data of Product 2h and 2j .....       | 14 |
| CheckCIF reports of 2h and 2j.....                                              | 17 |
| Spectrum of <sup>1</sup> H NMR <sup>19</sup> F NMR and <sup>13</sup> C NMR..... | 23 |
| References .....                                                                | 63 |

## General Information

All solvents were dried according to known methods and distilled prior to use. Diazo compound were synthesized using known literature procedure<sup>[1-3]</sup>. Other reagents were commercially available and used as purchased. Purification of products was accomplished by chromatography using silica gel (200~300 mesh).

<sup>1</sup>H and <sup>13</sup>C NMR spectra were recorded on a Bruker advance III 400 spectrometer in CDCl<sub>3</sub> with TMS as internal standard. The chemical shifts (δ) were measured in ppm and all coupling constants are expressed in Hz. X-ray Single-crystal diffraction was measured on a Supemova spectrometer. IR spectra were recorded on a Bruker VERTEX 70V FT-IR spectrometer. HRMS were recorded on Bruker Apex II mass spectrometer with ESI resource.

## Experimental Procedures

### General Procedure for the Preparation of 4-Chromanone

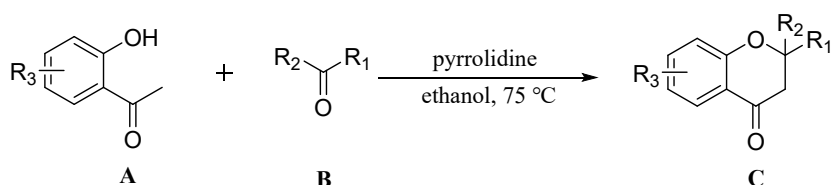

At room temperature, the pyrrolidine (1.5 mmol, 0.15 equiv) was added to the mixture of **A** (10 mmol, 1.0 equiv) and **B** (15 mmol, 1.5 equiv) in 50 ml of ethanol solution. Then the reaction was heated to 75 °C and refluxed for 4 hours. The reaction was monitored by TLC. The reaction mixture was extracted three times with EtOAc and saturated salt water. The combined organic layer was washed with water and saturated aqueous brine and dried over MgSO<sub>4</sub>. The filtrate was concentrated in vacuo. Further purification by a short silica gel column using petroleum ether (II, 60-90 °C) / EtOAc as eluent gave the corresponding product **C**.

### General Procedure for the Preparation of 3-diazo chroman-4-one

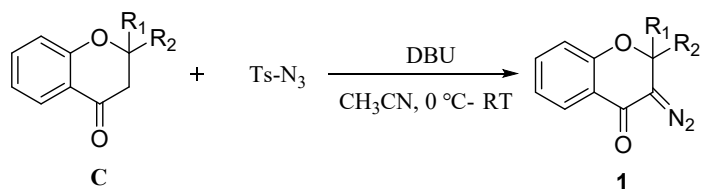

**C** (1 mmol, 1.0 equiv) and Ts-N<sub>3</sub> (1.5 mmol, 1.5 equiv) were dissolved in CH<sub>3</sub>CN (10 ml) and cooled to 0 °C in an ice/water bath. Then DBU (1.5 mmol, 1.5 equiv) was added dropwise. The reaction was monitored by TLC. The solution was stirred until full conversion of the substrate ketone and quenched with saturated aqueous NH<sub>4</sub>Cl (5 mL) and water (2 mL) and extracted with EtOAc three times (50 mL). The combined organic layer was washed with water (20 mL) and saturated aqueous brine (20 mL) and dried over MgSO<sub>4</sub>. The filtrate was filtered and concentrated in vacuo. Further purification by a short silica gel column using petroleum ether (II, 60-90 °C) /

EtOAc as eluent gave the corresponding product **1**.

## General Procedure for the Preparation of **2**

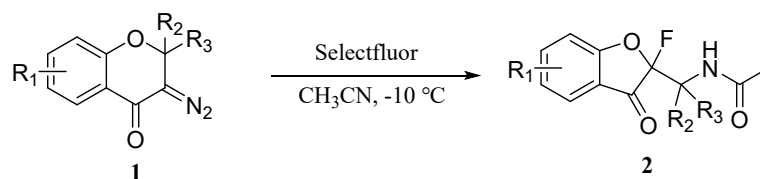

Under an air atmosphere, addition of **1** (0.2 mmol) in of 3ml acetonitrile over 6h (using a syringe pump) to a stirred solution of selectfluor (0.2 mmol) in 2ml acetonitrile at  $-10^\circ\text{C}$ . Then the reaction mixture stirred until the reaction was completed by TLC analysis. The reaction mixture was extracted three times with EtOAc, and the combined organic phases were dried over  $\text{MgSO}_4$ , filtered and concentrated in vacuo. Further purification by a short silica gel column using petroleum ether /EtOAc (4:1) as eluent gave the corresponding product **2a-2p**.

## General Procedure for the Preparation of 2-methoxy-2,3-dimethylchroman-4-one

Under optimal reaction conditions, we took **1a** as model and replaced the reaction solvent with methanol. Although the fluoride product was not obtained, we got 2-methoxy-2,3-dimethylchroman-4-one. We speculated that  $\text{OCH}_3$  captured rearrangement carbocation (B). As shown in Scheme 1, secondary carbocation (A) is less stable than tertiary carbocation (B).

Under air atmosphere, addition of **1a** (0.2 mmol) in of 3ml methanol over 6h (using a syringe pump) to a stirred solution of methanol (0.2 mmol) in 2ml methanol at  $-10^\circ\text{C}$ . Then the reaction mixture stirred until the reaction was completed by TLC analysis. The reaction mixture was extracted three times with EtOAc, and the combined organic phases were dried over  $\text{MgSO}_4$ , filtered and concentrated in vacuo. Further purification by a short silica gel column using petroleum ether /EtOAc (15:1) as eluent gave the corresponding product 2-methoxy-2,3-dimethylchroman-4-one.

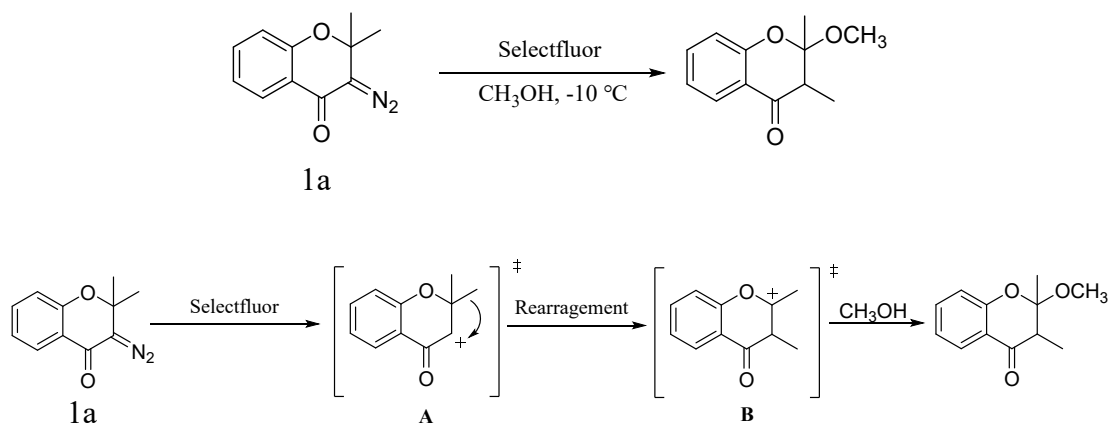

Scheme 1 The proposed mechanism.



## Characterization Data for Products.

### Characterization Data for Products 1.

#### 1a<sup>[3]</sup> 3-Diazo-2, 2-dimethyl-chroman-4-one

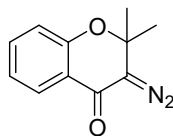

<sup>1</sup>H NMR (400MHz, CDCl<sub>3</sub>): δ 7.88 (dd, *J* = 7.8, 1.7 Hz, 1H), 7.41 (ddd, *J* = 8.3, 7.3, 1.8 Hz, 1H), 7.07 – 7.00 (m, 1H), 6.91 (dd, *J* = 8.3, 0.8 Hz, 1H), 1.68 (s, 6H);

<sup>13</sup>C NMR (100MHz, CDCl<sub>3</sub>): δ 178.4, 157.1, 135.0, 125.9, 121.8, 121.1, 118.2, 75.0, 27.2.

#### 1b<sup>[3]</sup> 3-diazochroman-4-one

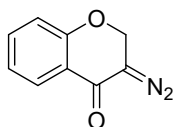

<sup>1</sup>H NMR (400 MHz, CDCl<sub>3</sub>): δ 7.92 (dd, *J* = 7.8, 1.8 Hz, 1H), 7.48 – 7.39 (m, 1H), 7.13 – 7.05 (m, 1H), 6.97 (dd, *J* = 8.3, 1.2 Hz, 1H), 5.20 (s, 2H);

<sup>13</sup>C NMR (101 MHz, CDCl<sub>3</sub>): δ 178.63, 159.44, 134.89, 126.39, 122.47, 117.74, 62.30.

#### 1c<sup>[3]</sup> 3-diazo-2-methylchroman-4-one

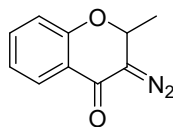

<sup>1</sup>H NMR (400 MHz, CDCl<sub>3</sub>): δ 7.91 (dd, *J* = 7.8, 1.8 Hz, 1H), 7.44 (ddd, *J* = 8.2, 7.2, 1.8 Hz, 1H), 7.08 (ddd, *J* = 7.5, 7.4, 1.0 Hz, 1H), 6.95 (dd, *J* = 8.3, 1.2 Hz, 1H), 5.41 (q, *J* = 6.3, 1.0 Hz, 1H), 1.71 (d, *J* = 6.3, 1.0 Hz, 3H)

<sup>13</sup>C NMR (101 MHz, CDCl<sub>3</sub>): δ 179.05, 158.74, 134.92, 126.28, 122.28, 117.77, 68.83, 18.44.

#### 1d<sup>[2]</sup> 3-diazo-2,2-diethylchroman-4-one

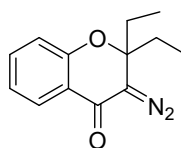

<sup>1</sup>H NMR (400 MHz, CDCl<sub>3</sub>): δ 7.89 (dd, *J* = 7.8, 1.8 Hz, 1H), 7.42 (ddd, *J* = 8.3, 7.3, 1.8 Hz, 1H), 7.03 (ddd, *J* = 7.6, 7.5, 1.1 Hz, 1H), 6.92 (dd, *J* = 8.3, 1.1 Hz, 1H), 2.10 – 1.80 (m, 5H), 1.03 (t, *J* = 7.4 Hz, 7H)

<sup>13</sup>C NMR (101 MHz, CDCl<sub>3</sub>): δ 178.07, 156.60, 134.05, 124.82, 120.52, 79.73, 30.05, 7.06.

#### 1e<sup>[2]</sup> 3-diazospiro[chromane-2,1'-cyclopentan]-4-one

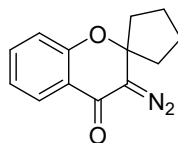

<sup>1</sup>H NMR (400 MHz, CDCl<sub>3</sub>): δ 7.90 (dd, *J* = 7.8, 1.8 Hz, 1H), 7.42 (ddd, *J* = 8.7, 7.3, 1.8 Hz, 1H), 7.06 (ddd, *J* = 7.6, 7.5, 1.1 Hz, 1H), 6.91 (dd, *J* = 8.3, 1.0 Hz, 1H), 2.39 – 2.31 (m, 2H), 2.03 – 1.94 (m, 2H), 1.88 – 1.78 (m, 4H);

**<sup>13</sup>C NMR (101 MHz, CDCl<sub>3</sub>):** δ 178.18, 156.32, 133.84, 125.07, 120.92, 117.37, 83.89, 37.06, 22.13.

**1f<sup>[3]</sup>** 3-diazospiro[chromane-2,1'-cyclohexan]-4-one

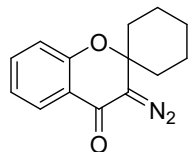

**<sup>1</sup>H NMR (400 MHz, CDCl<sub>3</sub>):** δ 7.90 (dd, *J* = 7.7, 1.8 Hz, 1H), 7.44 (ddd, *J* = 8.7, 7.3, 1.7 Hz, 1H), 7.06 (ddd, *J* = 7.6, 7.5, 1.1 Hz, 1H), 6.98 (dd, *J* = 8.2, 1.1 Hz, 1H), 2.32 – 2.24 (m, 2H), 1.90 – 1.72 (m, 4H), 1.68 – 1.54 (m, 4H), 1.38 – 1.23 (m, 1H);

**<sup>13</sup>C NMR (101 MHz, CDCl<sub>3</sub>):** δ 177.98, 155.75, 133.91, 125.00, 120.85, 120.72, 117.28, 74.63, 67.84, 34.17, 23.70, 20.31.

**1g<sup>[2]</sup>** 3-diazo-2-phenylchroman-4-one

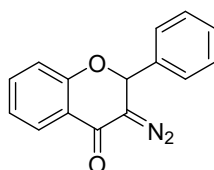

**<sup>1</sup>H NMR (400 MHz, CDCl<sub>3</sub>):** δ 7.90 (dd, *J* = 7.7, 1.8 Hz, 1H), 7.44 (ddd, *J* = 8.7, 7.3, 1.7 Hz, 1H), 7.06 (ddd, *J* = 7.5, 7.5, 1.1 Hz, 1H), 6.98 (dd, *J* = 8.2, 1.1 Hz, 1H), 2.32 – 2.24 (m, 2H), 1.90 – 1.72 (m, 4H), 1.68 – 1.54 (m, 4H), 1.38 – 1.23 (m, 1H);

**<sup>13</sup>C NMR (101 MHz, CDCl<sub>3</sub>):** δ 177.53, 157.52, 150.47, 134.16, 134.06, 129.13, 128.23, 126.44, 125.26, 121.51, 121.07, 116.95, 74.50.

**1h** 3-diazo-2-methyl-2-phenylchroman-4-one

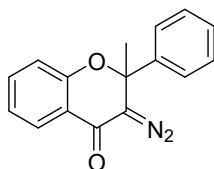

**<sup>1</sup>H NMR (400 MHz, CDCl<sub>3</sub>):** δ 7.75 (dd, *J* = 8.1, 1.8 Hz, 1H), 7.42 – 7.38 (m, 2H), 7.32 (ddd, *J* = 8.2, 7.2, 1.7 Hz, 1H), 7.28 – 7.23 (m, 2H), 7.22 – 7.18 (m, 1H), 6.94 – 6.89 (m, 2H), 1.93 (s, 3H);

**<sup>13</sup>C NMR (101 MHz, CDCl<sub>3</sub>):** δ 177.61, 156.35, 141.86, 134.07, 127.70, 127.63, 125.11, 124.56, 121.16, 120.73, 117.39, 78.05, 67.28, 27.17.

**HRMS (ESI):** *m/z* = 287.0791 calcd for C<sub>16</sub>H<sub>12</sub>N<sub>2</sub>O<sub>2</sub> + Na [M + Na]<sup>+</sup>, found: 287.0793.

**1i** 3-diazo-2,2,6-trimethylchroman-4-one

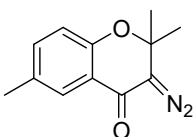

**<sup>1</sup>H NMR (400 MHz, CDCl<sub>3</sub>):** δ 7.70 (d, *J* = 7.9 Hz, 1H), 7.24 (dd, *J* = 8.3, 2.3 Hz, 1H), 6.82 (d, *J* = 8.3 Hz, 1H), 2.32 (s, 3H), 1.68 (s, 6H);

**<sup>13</sup>C NMR (101 MHz, CDCl<sub>3</sub>):** δ 177.76, 154.05, 134.94, 130.42, 124.76, 119.75, 117.07, 73.83, 26.16, 19.44.

**HRMS (ESI):** *m/z* = 239.0791 calcd for C<sub>12</sub>H<sub>12</sub>N<sub>2</sub>O<sub>2</sub> + Na [M + Na]<sup>+</sup>, found: 239.0793.

**1j**<sup>[2]</sup> 3-diazo-6-methoxy-2,2-dimethylchroman-4-one

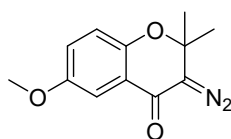

**<sup>1</sup>H NMR (400 MHz, CDCl<sub>3</sub>):** δ 7.35 (dd, *J* = 3.2, 1.2 Hz, 1H), 7.02 (ddd, *J* = 9.0, 3.2, 1.2 Hz, 1H), 6.86 (dd, *J* = 8.9, 1.1 Hz, 1H), 3.82 (d, *J* = 1.3 Hz, 3H), 1.68 (s, 6H);

**<sup>13</sup>C NMR (101 MHz, CDCl<sub>3</sub>):** δ 177.53, 153.53, 150.32, 122.32, 120.19, 118.49, 106.43, 73.80, 54.82, 26.07.

**1k** 3-diazo-6-methoxy-2-phenylchroman-4-one

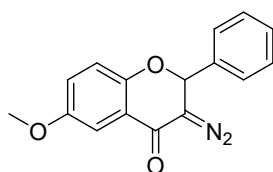

**<sup>1</sup>H NMR (400 MHz, CDCl<sub>3</sub>):** δ 7.90 (d, *J* = 8.8 Hz, 1H), 7.56 (m, 2H), 7.48 (m, 3H), 6.68 (dd, *J* = 8.8, 2.4 Hz, 1H), 6.48 (d, *J* = 2.4 Hz, 1H), 6.26 (s, 1H), 3.83 (s, 3H);

**<sup>13</sup>C NMR (101 MHz, CDCl<sub>3</sub>):** δ 176.83, 164.30, 159.36, 134.18, 129.11, 128.21, 126.91, 126.44, 114.56, 109.23, 100.65, 74.88, 54.62.

**HRMS (ESI):** *m/z* = 303.0740 calcd for C<sub>16</sub>H<sub>12</sub>N<sub>2</sub>O<sub>3</sub>+Na [M+ Na]<sup>+</sup>, found: 303.0742.

**1l**<sup>[2]</sup> 6-chloro-3-diazo-2,2-dimethylchroman-4-one

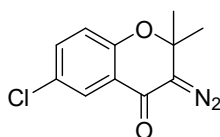

**<sup>1</sup>H NMR (400 MHz, CDCl<sub>3</sub>):** δ 7.86 (d, *J* = 2.7 Hz, 1H), 7.38 (dd, *J* = 8.8, 2.7 Hz, 1H), 6.89 (d, *J* = 8.8 Hz, 1H), 1.70 (s, 6H);

**<sup>13</sup>C NMR (101 MHz, CDCl<sub>3</sub>):** δ 176.29, 154.52, 133.74, 126.47, 124.50, 120.98, 118.91, 74.49, 26.21.

**1m**<sup>[2]</sup> 6-bromo-3-diazo-2,2-dimethylchroman-4-one

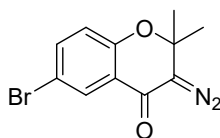

**<sup>1</sup>H NMR (400 MHz, CDCl<sub>3</sub>):** δ 8.44 (d, *J* = 2.6 Hz, 1H), 7.94 (dd, *J* = 8.8, 2.5 Hz, 1H), 7.26 (d, *J* = 8.7 Hz, 1H), 2.12 (s, 6H).;

**<sup>13</sup>C NMR (101 MHz, CDCl<sub>3</sub>):** δ 176.15, 155.02, 136.58, 127.52, 121.41, 119.28, 113.61, 74.51, 26.22.

**1n**<sup>[2]</sup> 3-diazo-2,2-dimethyl-6-nitrochroman-4-one

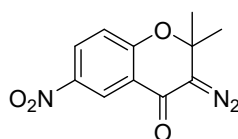

**<sup>1</sup>H NMR (400 MHz, CDCl<sub>3</sub>):** δ 8.81 (d, *J* = 2.8 Hz, 1H), 8.31 (dd, *J* = 9.1, 2.9 Hz, 1H), 7.07 (d, *J*

= 9.0 Hz, 1H), 1.76 (s, 6H).;

**<sup>13</sup>C NMR (101 MHz, CDCl<sub>3</sub>):** δ 175.08, 160.39, 128.61, 121.55, 119.69, 118.39, 26.53.

**1o** 3-diazo-7-fluoro-2,2-dimethylchroman-4-one

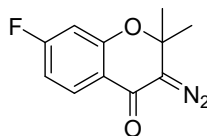

**<sup>1</sup>H NMR (400 MHz, CDCl<sub>3</sub>):** δ 7.86 (dd, *J* = 8.7, 6.7 Hz, 1H), 6.67 (dd, *J* = 8.5, 2.4 Hz, 1H), 6.60 (m, 1H), 1.45 (s, 6H);

**<sup>13</sup>C NMR (101 MHz, CDCl<sub>3</sub>):** δ 190.01, 167.99, 165.45, 160.63, 128.06, 116.11 (d, *J* = 2.5 Hz), 108.14, 103.86, 79.11, 25.56.

**HRMS (ESI):** *m/z*=243.0540 calcd for C<sub>12</sub>H<sub>12</sub>N<sub>2</sub>F<sub>1</sub>O<sub>2</sub>+Na [M+ Na]<sup>+</sup>, found: 243.0542.

**1p** 3-diazo-7-methoxy-2,2-dimethylchroman-4-one

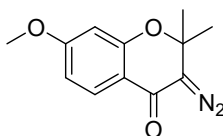

**<sup>1</sup>H NMR (400 MHz, CDCl<sub>3</sub>):** δ 7.83 (dd, *J* = 8.7, 1.3 Hz, 1H), 6.62 (ddd, *J* = 8.7, 2.5, 1.3 Hz, 1H), 6.40 (dd, *J* = 2.2, 1.1 Hz, 1H), 3.83 (d, *J* = 1.1 Hz, 3H), 1.69 (d, *J* = 1.0 Hz, 6H).;

**<sup>13</sup>C NMR (101 MHz, CDCl<sub>3</sub>):** δ 176.75, 164.36, 158.01, 126.65, 113.71, 108.56, 101.00, 74.47, 54.56, 26.21.

**HRMS (ESI):** *m/z*=255.0740 calcd for C<sub>12</sub>H<sub>12</sub>N<sub>2</sub>O<sub>3</sub>+Na [M+ Na]<sup>+</sup>, found: 255.0743.

## Characterization Data for Products 2.

**2a** A white solid after purification by flash column chromatography (petroleum ether/ethyl acetate = 4/1, yield 48%).

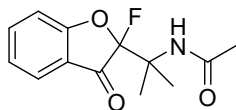

**<sup>1</sup>H NMR (400 MHz, CDCl<sub>3</sub>):** δ 7.69 (ddd, *J* = 7.2, 4.2, 2.7 Hz, 2H), 7.18 (m, 2H), 6.43 (s, 1H), 1.96 (s, 3H), 1.69 (s, 3H), 1.45 (s, 3H).

**<sup>19</sup>F NMR (376 MHz, CDCl<sub>3</sub>):** δ -130.58 (s, 1F).

**<sup>13</sup>C NMR (101 MHz, CDCl<sub>3</sub>):** δ 193.7 (d, *J* = 20.2 Hz), 170.3, 169.8, 139.6, 125.4, 123.9, 119.1, 113.1, 110.0 (d, *J* = 245.4 Hz), 57.9 (d, *J* = 25.7 Hz), 24.5, 20.7 (d, *J* = 3.8 Hz), 19.9 (d, *J* = 3.3 Hz).

**HRMS (ESI):** *m/z* = 274.0857 calcd for C<sub>13</sub>H<sub>14</sub>F<sub>1</sub>N<sub>1</sub>O<sub>3</sub>+Na [M+ Na]<sup>+</sup>, found: 274.0850;

**IR (cm<sup>-1</sup>):** 3295, 1737, 1666, 1614, 1080.

**2b** A white solid after purification by flash column chromatography (petroleum ether/ethyl acetate = 4/1, yield 25%).

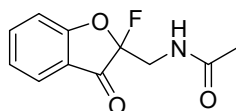

**<sup>1</sup>H NMR (400 MHz, CDCl<sub>3</sub>):** δ 7.70 (ddd, *J* = 7.3, 4.1, 1.4 Hz, 2H), 7.22 – 7.13 (m, 2H), 5.96 (s, 1H), 4.04 (ddd, *J* = 16.3, 15.0, 6.8 Hz, 1H), 3.84 (td, *J* = 14.8, 5.5 Hz, 1H), 2.02 (s, 3H).

**<sup>19</sup>F NMR (376 MHz, CDCl<sub>3</sub>):** δ -123.01 (dd, *J* = 24.9, 10.1 Hz, 1F)

**<sup>13</sup>C NMR (101 MHz, CDCl<sub>3</sub>):** δ 192.6 (d, *J* = 18.9 Hz), 170.4, 170.3, 139.6, 125.6, 124.0, 118.3, 113.5, 108.3 (d, *J* = 238.9 Hz), 40.2 (d, *J* = 31.7 Hz), 23.1.

**HRMS (ESI):** *m/z* = 246.0537 calcd for C<sub>11</sub>H<sub>10</sub>F<sub>1</sub>N<sub>1</sub>O<sub>3</sub>+Na [M+ Na]<sup>+</sup>, found: 246.0541;

**IR (cm<sup>-1</sup>):** 3290, 1736, 1656, 1616, 1076.

**2c** A white solid after purification by flash column chromatography (petroleum ether/ethyl acetate = 4/1, yield 35%, dr >20:1).

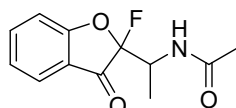

**<sup>1</sup>H NMR (400 MHz, CDCl<sub>3</sub>):** δ 8.66 – 8.63 (m, 2H), 7.70 (ddd, *J* = 7.6, 5.9, 1.4 Hz, 2H), 7.23 – 7.00 (m, 1H), 5.82 (d, *J* = 9.0 Hz, 1H), 4.74 (ddd, *J* = 13.2, 9.5, 6.9 Hz, 1H), 2.05 (s, 3H), 1.24 (d, *J* = 6.9 Hz, 3H).

**<sup>19</sup>F NMR (376 MHz, CDCl<sub>3</sub>):** δ -128.19 (d, *J* = 13.1 Hz, 1F).

**<sup>13</sup>C NMR (101 MHz, CDCl<sub>3</sub>):** δ 192.3 (d, *J* = 19.2 Hz), 170.2, 169.9, 139.4, 125.6, 123.9, 118.8, 113.2, 109.6 (d, *J* = 242.6 Hz), 46.2 (d, *J* = 27.2 Hz), 23.3, 14.74 (d, *J* = 5.0 Hz).

**HRMS (ESI):** *m/z* = 260.0693 calcd for C<sub>12</sub>H<sub>12</sub>F<sub>1</sub>N<sub>1</sub>O<sub>3</sub>+Na [M+ Na]<sup>+</sup>, found: 260.0699;

**IR (cm<sup>-1</sup>):** 3275, 1738, 1658, 1615, 1051.

**2d** A white solid after purification by flash column chromatography (petroleum ether/ethyl acetate = 4/1, yield 25%).

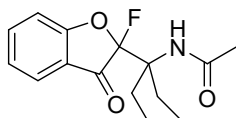

**<sup>1</sup>H NMR (400 MHz, CDCl<sub>3</sub>):** δ 7.74 – 7.66 (m, 2H), 7.22 – 7.09 (m, 2H), 6.14 (s, 1H), 2.39 – 2.29 (m, 1H), 2.21 (dd, *J* = 14.6, 7.4 Hz, 1H), 2.15 – 2.07 (m, 1H), 1.96 (s, 3H), 1.93 – 1.84 (m, 1H), 1.00 (dd, *J* = 7.5, 6.3 Hz, 3H), 0.81 (t, *J* = 7.5 Hz, 3H).

**<sup>19</sup>F NMR (376 MHz, CDCl<sub>3</sub>):** δ -123.30 (s, 1F).

**<sup>13</sup>C NMR (101 MHz, CDCl<sub>3</sub>):** δ 193.6 (d, *J* = 21.0 Hz), 169.7, 169.6, 139.2, 125.5, 123.8, 119.0, 113.1, 111.1 (d, *J* = 245.2 Hz), 63.6 (d, *J* = 24.4 Hz), 25.5 (d, *J* = 3.8 Hz), 25.1, 24.3, 8.8 (d, *J* = 3.9 Hz), 8.8.

**HRMS (ESI):** *m/z* = 302.1163 calcd for C<sub>15</sub>H<sub>18</sub>F<sub>1</sub>N<sub>1</sub>O<sub>3</sub>+Na [M+ Na]<sup>+</sup>, found: 302.1166;

**IR (cm<sup>-1</sup>):** 3309, 1741, 1663, 1616, 1080.

**2e** A white solid after purification by flash column chromatography (petroleum ether/ethyl acetate = 4/1, yield 20%).

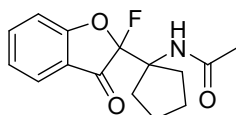

**<sup>1</sup>H NMR (400 MHz, CDCl<sub>3</sub>):** δ 7.79 – 7.58 (m, 2H), 7.21 – 7.06 (m, 2H), 5.98 (s, 1H), 2.45 – 2.35 (m, 1H), 2.33 – 2.24 (m, 1H), 2.15 – 2.03 (m, 1H), 1.98 – 1.89 (m, 1H), 1.88 (s, 3H), 1.84 (d, *J* = 4.7 Hz, 1H), 1.82 – 1.71 (m, 2H), 1.71 – 1.63 (m, 1H).

**<sup>19</sup>F NMR (376 MHz, CDCl<sub>3</sub>):** δ -125.43 (s, 1F).

**<sup>13</sup>C NMR (101 MHz, CDCl<sub>3</sub>):** 193.7 (d, *J* = 20.5 Hz), 170.12, 169.7, 139.3, 125.5, 123.7, 119.5, 113.1, 110.5 (d, *J* = 244.8 Hz), 67.2 (d, *J* = 27.1 Hz), 33.9 (d, *J* = 3.3 Hz), 32.5, 25.4, 25.2, 24.4.

**HRMS (ESI):** *m/z* = 300.1006 calcd for C<sub>15</sub>H<sub>16</sub>F<sub>1</sub>N<sub>1</sub>O<sub>3</sub>+Na [M+ Na]<sup>+</sup>, found: 300.1011;

**IR (cm<sup>-1</sup>):** 3300, 1742, 1665, 1615, 1024.

**2f** A white solid after purification by flash column chromatography (petroleum ether/ethyl acetate = 4/1, yield 25%).

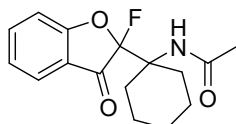

**<sup>1</sup>H NMR (400 MHz, CDCl<sub>3</sub>):** δ 7.69 – 7.54 (m, 2H), 7.16 – 7.04 (m, 2H), 5.13 (s, 1H), 2.82 – 2.69 (m, 1H), 2.17 (d, *J* = 13.3 Hz, 1H), 1.86 (s, 3H), 1.76 (td, *J* = 13.5, 3.6 Hz, 1H), 1.65 (d, *J* = 11.2 Hz, 3H), 1.59 – 1.46 (m, 1H), 1.40 (ddd, *J* = 13.3, 9.8, 3.1 Hz, 2H), 1.22 (ddd, *J* = 12.8, 7.0, 3.5 Hz, 1H).

**<sup>19</sup>F NMR (376 MHz, CDCl<sub>3</sub>):** δ -129.33 (s, 1F).

**<sup>13</sup>C NMR (101 MHz, CDCl<sub>3</sub>):** δ 193.2 (d, *J* = 20.1 Hz), 170.0, 167.0, 138.8, 125.2, 123.3, 119.7, 113.0, 111.2 (d, *J* = 246.1 Hz), 60.1 (d, *J* = 27.4 Hz), 28.7 (d, *J* = 3.6 Hz), 27.4, 25.0, 24.5, 20.9 (d, *J* = 6.3 Hz).

**HRMS (ESI):** *m/z* = 292.1343 calcd for C<sub>16</sub>H<sub>18</sub>F<sub>1</sub>N<sub>1</sub>O<sub>3</sub>+H [M+H]<sup>+</sup>, found: 292.1338;

**IR (cm<sup>-1</sup>):** 3296, 1738, 1669, 1615, 1028.

**2g** A white solid after purification by flash column chromatography (petroleum ether/ethyl acetate = 4/1, yield 52%, dr >20:1).

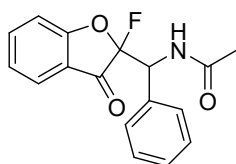

**<sup>1</sup>H NMR (400 MHz, CDCl<sub>3</sub>):** δ 7.59 (t, *J* = 7.3 Hz, 2H), 7.35 (d, *J* = 7.1 Hz, 2H), 7.22 (m, 3H), 7.13 – 7.03 (m, 2H), 6.90 (d, *J* = 8.9 Hz, 1H), 5.87 (dd, *J* = 9.0, 6.9 Hz, 1H), 2.03 (s, 3H).

**<sup>19</sup>F NMR (376 MHz, CDCl<sub>3</sub>):** δ -120.15 (d, *J* = 6.8 Hz, 1F).

**<sup>13</sup>C NMR (101 MHz, CDCl<sub>3</sub>):** δ 194.0 (d, *J* = 19.7 Hz), 171.0, 169.3, 139.6, 134.1, 134.0, 128.5, 128.4, 128.1, 125.3, 123.8, 118.7, 113.2, 108.1 (d, *J* = 245.5 Hz), 54.5 (d, *J* = 30.4 Hz), 23.3.

**HRMS (ESI):** *m/z*=322.0850 calcd for C<sub>17</sub>H<sub>14</sub>F<sub>1</sub>N<sub>1</sub>O<sub>3</sub>+Na [M+ Na]<sup>+</sup>, found: 322.0857;

**IR (cm<sup>-1</sup>):**3284, 1739, 1663, 1616, 1031.

**2h** A white solid after purification by flash column chromatography (petroleum ether/ethyl acetate = 4/1, yield 55%, dr >20:1)

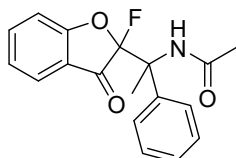

**<sup>1</sup>H NMR (400 MHz, CDCl<sub>3</sub>):** δ 7.67 – 7.60 (m, 2H), 7.47 (d, *J* = 8.0 Hz, 2H), 7.30 (t, *J* = 7.4 Hz, 2H), 7.23 (dd, *J* = 6.0, 3.5 Hz, 1H), 7.19 – 7.13 (m, 2H), 7.12 – 7.07 (m, 1H), 2.11 (s, 3H), 1.97 (d, *J* = 1.4 Hz, 3H).

**<sup>19</sup>F NMR (376 MHz, CDCl<sub>3</sub>):** δ -129.37 (s, 1F).

**<sup>13</sup>C NMR (101 MHz, CDCl<sub>3</sub>):** δ 193.4 (d, *J* = 20.3 Hz), 170.3, 169.0, 139.7, 137.0, 127.9, 127.8, 127.4, 125.4, 123.9, 118.9, 113.0, 109.0 (d, *J* = 248.5 Hz), 62.0 (d, *J* = 23.2 Hz), 24.2, 19.0.

**HRMS (ESI):** *m/z*=336.1006 calcd for C<sub>18</sub>H<sub>16</sub>F<sub>1</sub>N<sub>1</sub>O<sub>3</sub>+Na [M+ Na]<sup>+</sup>, found: 336.1013;

**IR (cm<sup>-1</sup>):**3402, 1732, 1685, 1615, 1081.

**2i** A white solid after purification by flash column chromatography (petroleum ether/ethyl acetate = 4/1, yield 53%).

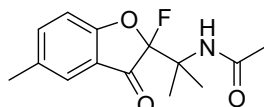

**<sup>1</sup>H NMR (400 MHz, CDCl<sub>3</sub>):** δ 7.50 (dd, *J* = 12.9, 4.5 Hz, 2H), 7.06 (d, *J* = 8.4 Hz, 1H), 6.45 (s, 1H), 2.37 (s, 3H), 1.97 (s, 3H), 1.69 (s, 3H), 1.44 (s, 3H).

**<sup>19</sup>F NMR (376 MHz, CDCl<sub>3</sub>):** δ -130.70 (s, 1F).

**<sup>13</sup>C NMR (101 MHz, CDCl<sub>3</sub>):** δ 194.0 (d, *J* = 20.4 Hz), 169.8, 169.0, 140.8, 133.8, 124.9, 119.0, 112.8, 110.2 (d, *J* = 245.2 Hz), 58.0 (d, *J* = 25.5 Hz), 24.6, 20.7 (d, *J* = 3.7 Hz), 20.6, 19.8 (d, *J* = 3.3 Hz).

**HRMS (ESI):** *m/z*=288.1006 calcd for C<sub>14</sub>H<sub>16</sub>F<sub>1</sub>N<sub>1</sub>O<sub>3</sub>+Na [M+ Na]<sup>+</sup>, found: 288.1011;

**IR (cm<sup>-1</sup>):**3307, 1739, 1670, 1620, 1080.

**2j** A white solid after purification by flash column chromatography (petroleum ether/ethyl acetate = 4/1, yield 58%).

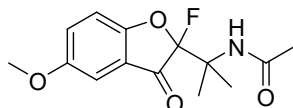

**<sup>1</sup>H NMR (400 MHz, CDCl<sub>3</sub>):** δ 7.29 (dd, *J* = 9.0, 2.7 Hz, 1H), 7.12 – 7.04 (m, 2H), 6.40 (s, 1H), 3.81 (s, 3H), 1.96 (s, 3H), 1.68 (s, 3H), 1.45 (s, 3H).

**<sup>19</sup>F NMR (376 MHz, CDCl<sub>3</sub>):** δ -130.62 (s, 1F).

**<sup>13</sup>C NMR (101 MHz, CDCl<sub>3</sub>):** δ 194.0 (d, *J* = 20.4 Hz), 169.8, 165.6, 156.2, 128.9, 119.2, 114.0, 110.7 (d, *J* = 244.8 Hz), 105.6, 57.9 (d, *J* = 25.8 Hz), 56.0, 24.5, 20.8 (d, *J* = 3.8 Hz), 19.9 (d, *J* = 3.3 Hz).

**HRMS (ESI):** *m/z*=304.0956 calcd for C<sub>14</sub>H<sub>16</sub>F<sub>1</sub>N<sub>1</sub>O<sub>4</sub>+Na [M+ Na]<sup>+</sup>, found: 304.0961;

**IR (cm<sup>-1</sup>):**3309, 1741, 1668, 1610, 1081.

**2k** A white solid after purification by flash column chromatography (petroleum ether/ethyl acetate = 4/1, yield 65%, dr >20:1).

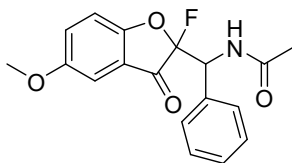

**<sup>1</sup>H NMR (400 MHz, CDCl<sub>3</sub>):** δ 7.35 (d, *J* = 7.0 Hz, 2H), 7.26 – 7.17 (m, 4H), 6.98 (d, *J* = 8.7 Hz, 2H), 6.86 (d, *J* = 8.8 Hz, 1H), 5.85 (dd, *J* = 8.7, 7.0 Hz, 1H), 3.76 (s, 3H), 2.04 (s, 3H).

**<sup>19</sup>F NMR (376 MHz, CDCl<sub>3</sub>):** δ -120.04 (d, *J* = 6.6 Hz, 1F).

**<sup>13</sup>C NMR (101 MHz, CDCl<sub>3</sub>):** δ 194.3 (d, *J* = 20.0 Hz), 169.3, 166.0, 156.1, 134.2, 129.0, 128.5, 128.5, 128.1, 118.8, 114.1, 108.8 (d, *J* = 245.0 Hz), 105.4, 55.9, 54.5 (d, *J* = 30.5 Hz), 23.4.

**HRMS (ESI):** *m/z*=352.0956 calcd for C<sub>18</sub>H<sub>16</sub>F<sub>1</sub>N<sub>1</sub>O<sub>4</sub>+Na [M+ Na]<sup>+</sup>, found: 352.0960;

**IR (cm<sup>-1</sup>):** 3290, 1738, 1661, 1607, 1073.

**2l** A white solid after purification by flash column chromatography (petroleum ether/ethyl acetate = 4/1, yield 42%).

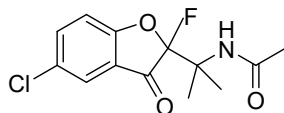

**<sup>1</sup>H NMR (400 MHz, CDCl<sub>3</sub>):** δ 7.69 – 7.61 (m, 2H), 7.12 (d, *J* = 8.7 Hz, 1H), 6.16 (s, 1H), 1.94 (s, 3H), 1.68 (s, 3H), 1.47 (d, *J* = 1.3 Hz, 3H).

**<sup>19</sup>F NMR (376 MHz, CDCl<sub>3</sub>):** δ -128.72 (s, 1F).

**<sup>13</sup>C NMR (101 MHz, CDCl<sub>3</sub>):** δ 192.1 (d, *J* = 20.8 Hz), 169.8, 168.3, 139.1, 129.5, 124.8, 120.5, 114.4, 110.8 (d, *J* = 246.1 Hz), 57.7 (d, *J* = 26.3 Hz), 24.4, 21.1 (d, *J* = 4.2 Hz), 20.1 (d, *J* = 2.9 Hz).

**HRMS (ESI):** *m/z*=308.0460 calcd for C<sub>13</sub>H<sub>13</sub>Cl<sub>1</sub>F<sub>1</sub>N<sub>1</sub>O<sub>3</sub>+Na [M+ Na]<sup>+</sup>, found: 308.0465;

**IR (cm<sup>-1</sup>):** 3290, 1748, 1663, 1612, 1078.

**2m** A white solid after purification by flash column chromatography (petroleum ether/ethyl acetate = 4/1, yield 38%).

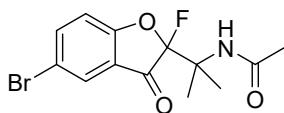

**<sup>1</sup>H NMR (400 MHz, CDCl<sub>3</sub>):** δ 7.81 (d, *J* = 2.0 Hz, 1H), 7.76 (dd, *J* = 8.7, 2.1 Hz, 1H), 7.07 (d, *J* = 8.7 Hz, 1H), 6.17 (s, 1H), 1.93 (s, 3H), 1.67 (s, 3H), 1.47 (d, *J* = 1.0 Hz, 3H).

**<sup>19</sup>F NMR (376 MHz, CDCl<sub>3</sub>):** δ -128.64 (s, 1F).

**<sup>13</sup>C NMR (101 MHz, CDCl<sub>3</sub>):** δ 191.8 (d, *J* = 20.7 Hz), 169.8, 168.7, 141.8, 127.9, 121.0, 116.4, 114.8, 110.6 (d, *J* = 246.2 Hz), 57.6 (d, *J* = 26.4 Hz), 24.4, 21.1 (d, *J* = 4.2 Hz), 20.1 (d, *J* = 2.8 Hz).

**HRMS (ESI):** *m/z*=351.9955 calcd for C<sub>13</sub>H<sub>13</sub>Br<sub>1</sub>F<sub>1</sub>N<sub>1</sub>O<sub>3</sub>+Na [M+ Na]<sup>+</sup>, found: 351.9963;

**IR (cm<sup>-1</sup>):** 3327, 1728, 1606, 1550, 1071.

**2n** A white solid after purification by flash column chromatography (petroleum ether/ethyl acetate = 4/1, yield 33%).

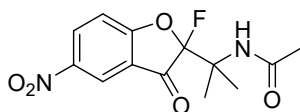

**<sup>1</sup>H NMR (400 MHz, CDCl<sub>3</sub>):** δ 8.60 (d, *J* = 2.3 Hz, 1H), 8.56 (dd, *J* = 8.9, 2.5 Hz, 1H), 7.28 (s, 1H),



5.84 (s, 1H), 1.88 (s, 3H), 1.69 (s, 3H), 1.53 (d,  $J = 2.0$  Hz, 3H).

$^{19}\text{F}$  NMR (376 MHz,  $\text{CDCl}_3$ ):  $\delta$  -125.39 (s, 1F).

$^{13}\text{C}$  NMR (101 MHz,  $\text{CDCl}_3$ ):  $\delta$  189.8 (d,  $J = 21.3$  Hz), 172.0, 169.9, 144.1, 133.5, 121.8, 120.4, 113.7, 111.8 (d,  $J = 247.0$  Hz), 57.1 (d,  $J = 28.2$  Hz), 23.9, 22.0 (d,  $J = 5.6$  Hz), 20.6.

HRMS (ESI): 319.0701 calcd for  $\text{C}_{13}\text{H}_{13}\text{F}_1\text{N}_2\text{O}_5 + \text{Na}$  [ $\text{M} + \text{Na}$ ] $^+$ , found: 319.0706;

IR ( $\text{cm}^{-1}$ ): 3299, 1757, 1625, 1610, 1065.

**2o** A white solid after purification by flash column chromatography (petroleum ether/ethyl acetate = 4/1, yield 31%).

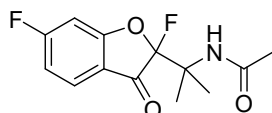

$^1\text{H}$  NMR (400 MHz,  $\text{CDCl}_3$ ):  $\delta$  7.71 (dd,  $J = 8.5, 5.6$  Hz, 1H), 6.91 (td,  $J = 8.7, 2.1$  Hz, 1H), 6.85 (dd,  $J = 8.6, 2.0$  Hz, 1H), 6.32 (s, 1H), 1.95 (s, 3H), 1.68 (s, 3H), 1.46 (d,  $J = 1.1$  Hz, 3H).

$^{19}\text{F}$  NMR (376 MHz,  $\text{CDCl}_3$ ):  $\delta$  -92.58 (td,  $J = 8.7, 6.5$  Hz, 1F), -129.10 (s, 1F).

$^{13}\text{C}$  NMR (101 MHz,  $\text{CDCl}_3$ ):  $\delta$  191.4 (d,  $J = 20.4$  Hz), 171.8 (d,  $J = 15.0$  Hz), 169.9 (d,  $J = 260.6$  Hz), 169.8, 127.5 (d,  $J = 12.2$  Hz), 115.8, 112.5 (d,  $J = 24.1$  Hz), 110.9 (d,  $J = 247.0$  Hz), 101.2 (d,  $J = 26.7$  Hz), 57.8 (d,  $J = 25.8$  Hz), 24.4, 20.9 (d,  $J = 3.9$  Hz), 20.0 (d,  $J = 3.3$  Hz).

HRMS (ESI):  $m/z = 292.0756$  calcd for  $\text{C}_{13}\text{H}_{13}\text{F}_2\text{N}_1\text{O}_3 + \text{Na}$  [ $\text{M} + \text{Na}$ ] $^+$ , found: 292.0760;

IR ( $\text{cm}^{-1}$ ): 3306, 1740, 1670, 1619, 1078.

**2p** A white solid after purification by flash column chromatography (petroleum ether/ethyl acetate = 4/1, yield 25%).

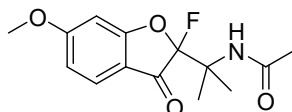

$^1\text{H}$  NMR (400 MHz,  $\text{CDCl}_3$ ):  $\delta$  7.60 (d,  $J = 8.6$  Hz, 1H), 6.72 (dd,  $J = 8.6, 2.1$  Hz, 1H), 6.63 (s, 1H), 6.60 (d,  $J = 2.0$  Hz, 1H), 3.92 (s, 3H), 1.98 (s, 3H), 1.70 (s, 3H), 1.43 (s, 3H).

$^{19}\text{F}$  NMR (376 MHz,  $\text{CDCl}_3$ ):  $\delta$  -130.29 (s, 1F).

$^{13}\text{C}$  NMR (101 MHz,  $\text{CDCl}_3$ ):  $\delta$  191.4 (d,  $J = 20.1$  Hz), 173.2, 169.9, 169.7, 126.7, 112.0, 111.9, 110.8 (d,  $J = 24.4$  Hz), 96.7, 58.1 (d,  $J = 25.2$  Hz), 56.2, 24.6, 20.6 (d,  $J = 3.5$  Hz), 19.8 (d,  $J = 3.9$  Hz).

HRMS (ESI):  $m/z = 304.0956$  calcd for  $\text{C}_{14}\text{H}_{16}\text{F}_1\text{N}_1\text{O}_4 + \text{Na}$  [ $\text{M} + \text{Na}$ ] $^+$ , found: 304.0960;

IR ( $\text{cm}^{-1}$ ): 3313, 1725, 1672, 1618, 1080.

## Theoretical section

All computations were performed using the Gaussian09 program<sup>[4]</sup>. The method RB3LYP with the basis set of 6-31g were performed for geometry optimization and energy calculation. The total energy values of  $\alpha$ -fluorine benzofuranone (Fig. S1a) and  $\alpha$ -fluorine benzopyranone (Fig. S1b) are obtained by subtracting the lowest values in the same calculation methods and CH<sub>3</sub>CN solution. The result shows that five-membered ring of  $\alpha$ -fluorine benzofuranone is more stable and that the energy difference between the two molecules is 36.97 kJ/mol.

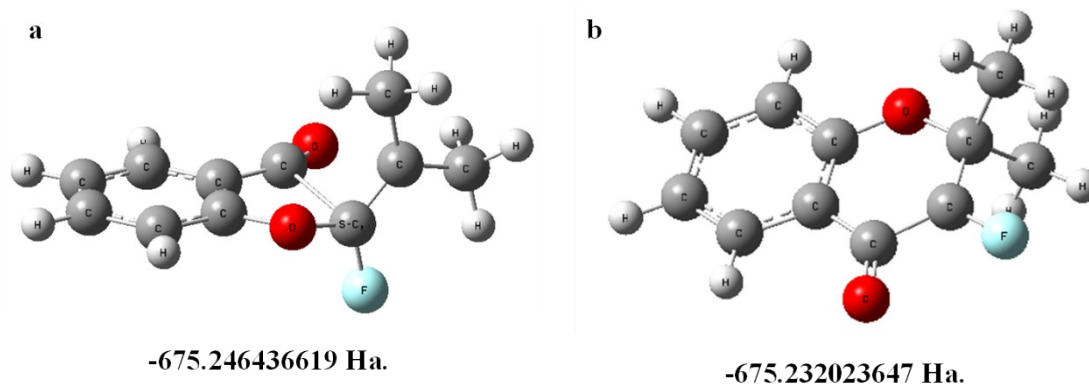

Fig. S1 Optimized molecular structures of  $\alpha$ -fluorine benzofuraone (a) and  $\alpha$ -fluorine benzopyranone (b) at the RB3LYP/6-31g level of calculations.

## Absolute Configuration and X-Ray Analysis Data of Product 2h and 2j

X-ray structure of compound 2h

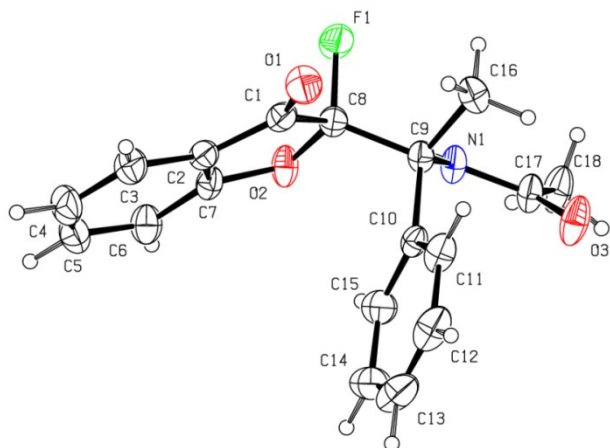

Crystal Data for  $C_{14}H_{16}FNO_4$  ( $M = 281.28$  g/mol): trigonal, space group R-3 (no. 148),  $a = 26.022(3)$  Å,  $c = 12.7042(8)$  Å,  $V = 7450.0(16)$  Å<sup>3</sup>,  $Z = 18$ ,  $T = 290.83(10)$  K,  $\mu(\text{MoK}\alpha) = 0.090$  mm<sup>-1</sup>,  $D_{\text{calc}} = 1.128$  g/cm<sup>3</sup>, 6612 reflections measured ( $6.664^\circ \leq 2\Theta \leq 52.034^\circ$ ), 3254 unique ( $R_{\text{int}} = 0.0441$ ,  $R_{\text{sigma}} = 0.1028$ ) which were used in all calculations. The final  $R_1$  was 0.0856 ( $I > 2\sigma(I)$ ) and  $wR_2$  was 0.2635 (all data).

Table 1 Crystal data and structure refinement for zhangwt\_0317.

|                                    |                     |
|------------------------------------|---------------------|
| Identification code                | zhangwt_0317        |
| Empirical formula                  | $C_{14}H_{16}FNO_4$ |
| Formula weight                     | 281.28              |
| Temperature/K                      | 290.83(10)          |
| Crystal system                     | trigonal            |
| Space group                        | R-3                 |
| $a/\text{\AA}$                     | 26.022(3)           |
| $b/\text{\AA}$                     | 26.022(3)           |
| $c/\text{\AA}$                     | 12.7042(8)          |
| $\alpha/^\circ$                    | 90                  |
| $\beta/^\circ$                     | 90                  |
| $\gamma/^\circ$                    | 120                 |
| Volume/Å <sup>3</sup>              | 7450.0(16)          |
| $Z$                                | 18                  |
| $\rho_{\text{calc}}/\text{g/cm}^3$ | 1.128               |
| $\mu/\text{mm}^{-1}$               | 0.090               |
| $F(000)$                           | 2664.0              |

|                                                  |                                                                       |
|--------------------------------------------------|-----------------------------------------------------------------------|
| Crystal size/mm <sup>3</sup>                     | 0.31 × 0.25 × 0.24                                                    |
| Radiation                                        | MoK $\alpha$ ( $\lambda$ = 0.71073)                                   |
| 2 $\Theta$ range for data collection/ $^{\circ}$ | 6.664 to 52.034                                                       |
| Index ranges                                     | -14 $\leq$ h $\leq$ 34, -25 $\leq$ k $\leq$ 33, -17 $\leq$ l $\leq$ 9 |
| Reflections collected                            | 6612                                                                  |
| Independent reflections                          | 3254 [ $R_{\text{int}}$ = 0.0441, $R_{\text{sigma}}$ = 0.1028]        |
| Data/restraints/parameters                       | 3254/0/185                                                            |
| Goodness-of-fit on $F^2$                         | 1.004                                                                 |
| Final R indexes [ $I \geq 2\sigma(I)$ ]          | $R_1$ = 0.0856, $wR_2$ = 0.2086                                       |
| Final R indexes [all data]                       | $R_1$ = 0.1938, $wR_2$ = 0.2635                                       |
| Largest diff. peak/hole / e $\text{\AA}^{-3}$    | 0.61/-0.24                                                            |

X-ray structure of compound 2j

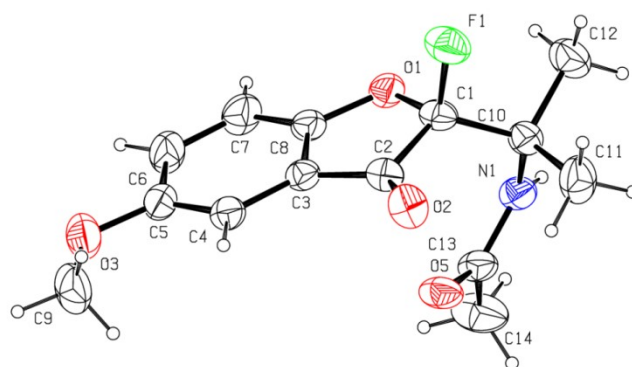

Crystal Data for C<sub>14</sub>H<sub>16</sub>FNO<sub>4</sub> ( $M$  = 281.28 g/mol): monoclinic, space group P2<sub>1</sub>/n (no. 14),  $a$  = 11.6384(6)  $\text{\AA}$ ,  $b$  = 10.1354(4)  $\text{\AA}$ ,  $c$  = 23.7540(13)  $\text{\AA}$ ,  $\beta$  = 93.521(5) $^{\circ}$ ,  $V$  = 2796.7(2)  $\text{\AA}^3$ ,  $Z$  = 8,  $T$  = 293.23(10) K,  $\mu(\text{MoK}\alpha)$  = 0.106 mm<sup>-1</sup>,  $D_{\text{calc}}$  = 1.336 g/cm<sup>3</sup>, 10998 reflections measured (6.88 $^{\circ}$   $\leq$  2 $\Theta$   $\leq$  52.04 $^{\circ}$ ), 5483 unique ( $R_{\text{int}}$  = 0.0507,  $R_{\text{sigma}}$  = 0.0793) which were used in all calculations. The final  $R_1$  was 0.0726 ( $>2\sigma(I)$ ) and  $wR_2$  was 0.2293 (all data).

Table 1 Crystal data and structure refinement for mabaochun\_0626.

|                     |                                                  |
|---------------------|--------------------------------------------------|
| Identification code | mabaochun_0626                                   |
| Empirical formula   | C <sub>14</sub> H <sub>16</sub> FNO <sub>4</sub> |
| Formula weight      | 281.28                                           |
| Temperature/K       | 293.23(10)                                       |
| Crystal system      | monoclinic                                       |
| Space group         | P2 <sub>1</sub> /n                               |
| $a/\text{\AA}$      | 11.6384(6)                                       |

|                                             |                                                                |
|---------------------------------------------|----------------------------------------------------------------|
| b/Å                                         | 10.1354(4)                                                     |
| c/Å                                         | 23.7540(13)                                                    |
| $\alpha$ /°                                 | 90.00                                                          |
| $\beta$ /°                                  | 93.521(5)                                                      |
| $\gamma$ /°                                 | 90.00                                                          |
| Volume/Å <sup>3</sup>                       | 2796.7(2)                                                      |
| Z                                           | 8                                                              |
| $\rho_{\text{calc}}$ /cm <sup>3</sup>       | 1.336                                                          |
| $\mu$ /mm <sup>-1</sup>                     | 0.106                                                          |
| F(000)                                      | 1184.0                                                         |
| Crystal size/mm <sup>3</sup>                | 0.15 × 0.12 × 0.07                                             |
| Radiation                                   | MoK $\alpha$ ( $\lambda$ = 0.71073)                            |
| 2 $\Theta$ range for data collection/°      | 6.88 to 52.04                                                  |
| Index ranges                                | -14 ≤ h ≤ 14, -12 ≤ k ≤ 7, -29 ≤ l ≤ 16                        |
| Reflections collected                       | 10998                                                          |
| Independent reflections                     | 5483 [ $R_{\text{int}}$ = 0.0507, $R_{\text{sigma}}$ = 0.0793] |
| Data/restraints/parameters                  | 5483/0/369                                                     |
| Goodness-of-fit on F <sup>2</sup>           | 1.049                                                          |
| Final R indexes [ $I \geq 2\sigma(I)$ ]     | $R_1$ = 0.0726, $wR_2$ = 0.1742                                |
| Final R indexes [all data]                  | $R_1$ = 0.1374, $wR_2$ = 0.2293                                |
| Largest diff. peak/hole / e Å <sup>-3</sup> | 0.21/-0.30                                                     |

## CheckCIF reports of 2h and 2j

### CheckCIF report of 2h

#### checkCIF/PLATON report

Structure factors have been supplied for datablock(s) mabaochun\_0626

THIS REPORT IS FOR GUIDANCE ONLY. IF USED AS PART OF A REVIEW PROCEDURE FOR PUBLICATION, IT SHOULD NOT REPLACE THE EXPERTISE OF AN EXPERIENCED CRYSTALLOGRAPHIC REFEREE.

No syntax errors found.    CIF dictionary    Interpreting this report

#### Datablock: mabaochun\_0626

---

|                    |                                            |                    |                |
|--------------------|--------------------------------------------|--------------------|----------------|
| Bond precision:    | C-C = 0.0051 A                             | Wavelength=0.71073 |                |
| Cell:              | a=11.6384 (6)                              | b=10.1354 (4)      | c=23.7540 (13) |
|                    | alpha=90                                   | beta=93.521 (5)    | gamma=90       |
| Temperature:       | 293 K                                      |                    |                |
|                    | Calculated                                 | Reported           |                |
| Volume             | 2796.7 (2)                                 | 2796.7 (2)         |                |
| Space group        | P 21/n                                     | P 1 21/n 1         |                |
| Hall group         | -P 2yn                                     | -P 2yn             |                |
| Moiety formula     | C14 H16 F N O4                             | C14 H16 F N O4     |                |
| Sum formula        | C14 H16 F N O4                             | C14 H16 F N O4     |                |
| Mr                 | 281.28                                     | 281.28             |                |
| Dx, g cm-3         | 1.336                                      | 1.336              |                |
| Z                  | 8                                          | 8                  |                |
| Mu (mm-1)          | 0.106                                      | 0.106              |                |
| F000               | 1184.0                                     | 1184.0             |                |
| F000'              | 1184.73                                    |                    |                |
| h, k, lmax         | 14, 12, 29                                 | 14, 12, 29         |                |
| Nref               | 5498                                       | 5483               |                |
| Tmin, Tmax         | 0.985, 0.993                               | 0.365, 1.000       |                |
| Tmin'              | 0.984                                      |                    |                |
| Correction method= | # Reported T Limits: Tmin=0.365 Tmax=1.000 |                    |                |
| AbsCorr =          | MULTI-SCAN                                 |                    |                |
| Data completeness= | 0.997                                      | Theta(max)=        | 26.020         |
| R(reflections)=    | 0.0726 ( 2784)                             | wR2(reflections)=  | 0.2293 ( 5483) |
| S =                | 1.049                                      | Npar=              | 369            |

---

The following ALERTS were generated. Each ALERT has the format  
**test-name\_ALERT\_alert-type\_alert-level**.  
Click on the hyperlinks for more details of the test.

---

**Alert level B**

PLAT910\_ALERT\_3\_B Missing # of FCF Reflection(s) Below Theta(Min). 13 Note

---

**Alert level C**

PLAT242\_ALERT\_2\_C Low 'MainMol' Ueq as Compared to Neighbors of C13 Check  
PLAT340\_ALERT\_3\_C Low Bond Precision on C-C Bonds ..... 0.00508 Ang.  
PLAT906\_ALERT\_3\_C Large K Value in the Analysis of Variance ..... 6.823 Check  
PLAT911\_ALERT\_3\_C Missing FCF Refl Between Thmin & STh/L= 0.600 6 Report

---

**Alert level G**

PLAT005\_ALERT\_5\_G No Embedded Refinement Details Found in the CIF Please Do !  
PLAT007\_ALERT\_5\_G Number of Unrefined Donor-H Atoms ..... 2 Report  
PLAT199\_ALERT\_1\_G Reported \_cell\_measurement\_temperature .... (K) 293 Check  
PLAT200\_ALERT\_1\_G Reported \_diffrn\_ambient\_temperature .... (K) 293 Check  
PLAT398\_ALERT\_2\_G Deviating C-O-C Angle From 120 for O1 . 107.5 Degree  
PLAT398\_ALERT\_2\_G Deviating C-O-C Angle From 120 for O5 . 107.4 Degree  
PLAT793\_ALERT\_4\_G Model has Chirality at C1 (Centro SPGR) S Verify  
PLAT793\_ALERT\_4\_G Model has Chirality at C15 (Centro SPGR) S Verify  
PLAT978\_ALERT\_2\_G Number C-C Bonds with Positive Residual Density. 0 Info

---

0 **ALERT level A** = Most likely a serious problem - resolve or explain  
1 **ALERT level B** = A potentially serious problem, consider carefully  
4 **ALERT level C** = Check. Ensure it is not caused by an omission or oversight  
9 **ALERT level G** = General information/check it is not something unexpected

2 ALERT type 1 CIF construction/syntax error, inconsistent or missing data  
4 ALERT type 2 Indicator that the structure model may be wrong or deficient  
4 ALERT type 3 Indicator that the structure quality may be low  
2 ALERT type 4 Improvement, methodology, query or suggestion  
2 ALERT type 5 Informative message, check

---

It is advisable to attempt to resolve as many as possible of the alerts in all categories. Often the minor alerts point to easily fixed oversights, errors and omissions in your CIF or refinement strategy, so attention to these fine details can be worthwhile. In order to resolve some of the more serious problems it may be necessary to carry out additional measurements or structure refinements. However, the purpose of your study may justify the reported deviations and the more serious of these should normally be commented upon in the discussion or experimental section of a paper or in the "special\_details" fields of the CIF. checkCIF was carefully designed to identify outliers and unusual parameters, but every test has its limitations and alerts that are not important in a particular case may appear. Conversely, the absence of alerts does not guarantee there are no aspects of the results needing attention. It is up to the individual to critically assess their own results and, if necessary, seek expert advice.

#### **Publication of your CIF in IUCr journals**

A basic structural check has been run on your CIF. These basic checks will be run on all CIFs submitted for publication in IUCr journals (*Acta Crystallographica*, *Journal of Applied Crystallography*, *Journal of Synchrotron Radiation*); however, if you intend to submit to *Acta Crystallographica Section C or E* or *IUCrData*, you should make sure that [full publication checks](#) are run on the final version of your CIF prior to submission.

#### **Publication of your CIF in other journals**

Please refer to the *Notes for Authors* of the relevant journal for any special instructions relating to CIF submission.

---

**PLATON version of 18/05/2022; check.def file version of 17/05/2022**



Datablock maboochun\_0626 - ellipsoid plot

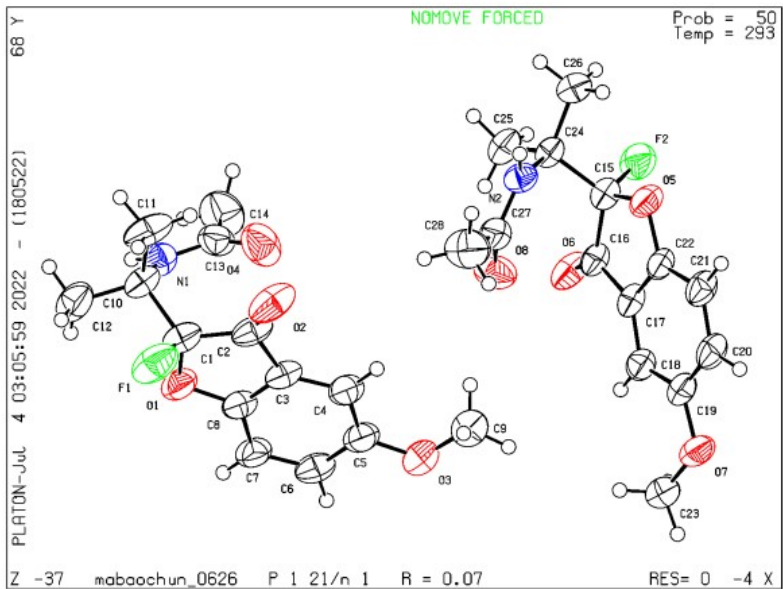

### checkCIF/PLATON report

Structure factors have been supplied for datablock(s) mabaochun\_0626

THIS REPORT IS FOR GUIDANCE ONLY. IF USED AS PART OF A REVIEW PROCEDURE FOR PUBLICATION, IT SHOULD NOT REPLACE THE EXPERTISE OF AN EXPERIENCED CRYSTALLOGRAPHIC REFEREE.

No syntax errors found. CIF dictionary Interpreting this report

### Datablock: mabaochun\_0626

---

Bond precision: C-C = 0.0051 A Wavelength=0.71073

Cell: a=11.6384 (6) b=10.1354 (4) c=23.7540 (13)  
alpha=90 beta=93.521 (5) gamma=90

Temperature: 293 K

|                | Calculated     | Reported       |
|----------------|----------------|----------------|
| Volume         | 2796.7 (2)     | 2796.7 (2)     |
| Space group    | P 21/n         | P 1 21/n 1     |
| Hall group     | -P 2yn         | -P 2yn         |
| Moiety formula | C14 H16 F N O4 | C14 H16 F N O4 |
| Sum formula    | C14 H16 F N O4 | C14 H16 F N O4 |
| Mr             | 281.28         | 281.28         |
| Dx, g cm-3     | 1.336          | 1.336          |
| Z              | 8              | 8              |
| Mu (mm-1)      | 0.106          | 0.106          |
| F000           | 1184.0         | 1184.0         |
| F000'          | 1184.73        |                |
| h, k, lmax     | 14, 12, 29     | 14, 12, 29     |
| Nref           | 5498           | 5483           |
| Tmin, Tmax     | 0.985, 0.993   | 0.365, 1.000   |
| Tmin'          | 0.984          |                |

Correction method= # Reported T Limits: Tmin=0.365 Tmax=1.000  
AbsCorr = MULTI-SCAN

Data completeness= 0.997 Theta(max)= 26.020

R(reflections)= 0.0726( 2784) wR2(reflections)=  
S = 1.049 Npar= 369 0.2293( 5483)

---

The following ALERTS were generated. Each ALERT has the format  
**test-name\_ALERT\_alert-type\_alert-level**.  
Click on the hyperlinks for more details of the test.

---

**Alert level B**

PLAT910\_ALERT\_3\_B Missing # of FCF Reflection(s) Below Theta(Min). 13 Note

---

**Alert level C**

PLAT242\_ALERT\_2\_C Low 'MainMol' Ueq as Compared to Neighbors of C13 Check  
PLAT340\_ALERT\_3\_C Low Bond Precision on C-C Bonds ..... 0.00508 Ang.  
PLAT906\_ALERT\_3\_C Large K Value in the Analysis of Variance ..... 6.823 Check  
PLAT911\_ALERT\_3\_C Missing FCF Refl Between Thmin & STh/L= 0.600 6 Report

---

**Alert level G**

PLAT005\_ALERT\_5\_G No Embedded Refinement Details Found in the CIF Please Do !  
PLAT007\_ALERT\_5\_G Number of Unrefined Donor-H Atoms ..... 2 Report  
PLAT199\_ALERT\_1\_G Reported \_cell\_measurement\_temperature .... (K) 293 Check  
PLAT200\_ALERT\_1\_G Reported \_diffrn\_ambient\_temperature .... (K) 293 Check  
PLAT398\_ALERT\_2\_G Deviating C-O-C Angle From 120 for O1 . 107.5 Degree  
PLAT398\_ALERT\_2\_G Deviating C-O-C Angle From 120 for O5 . 107.4 Degree  
PLAT793\_ALERT\_4\_G Model has Chirality at C1 (Centro SPGR) S Verify  
PLAT793\_ALERT\_4\_G Model has Chirality at C15 (Centro SPGR) S Verify  
PLAT978\_ALERT\_2\_G Number C-C Bonds with Positive Residual Density. 0 Info

---

0 **ALERT level A** = Most likely a serious problem - resolve or explain  
1 **ALERT level B** = A potentially serious problem, consider carefully  
4 **ALERT level C** = Check. Ensure it is not caused by an omission or oversight  
9 **ALERT level G** = General information/check it is not something unexpected

2 ALERT type 1 CIF construction/syntax error, inconsistent or missing data  
4 ALERT type 2 Indicator that the structure model may be wrong or deficient  
4 ALERT type 3 Indicator that the structure quality may be low  
2 ALERT type 4 Improvement, methodology, query or suggestion  
2 ALERT type 5 Informative message, check

---

It is advisable to attempt to resolve as many as possible of the alerts in all categories. Often the minor alerts point to easily fixed oversights, errors and omissions in your CIF or refinement strategy, so attention to these fine details can be worthwhile. In order to resolve some of the more serious problems it may be necessary to carry out additional measurements or structure refinements. However, the purpose of your study may justify the reported deviations and the more serious of these should normally be commented upon in the discussion or experimental section of a paper or in the "special\_details" fields of the CIF. checkCIF was carefully designed to identify outliers and unusual parameters, but every test has its limitations and alerts that are not important in a particular case may appear. Conversely, the absence of alerts does not guarantee there are no aspects of the results needing attention. It is up to the individual to critically assess their own results and, if necessary, seek expert advice.

#### **Publication of your CIF in IUCr journals**

A basic structural check has been run on your CIF. These basic checks will be run on all CIFs submitted for publication in IUCr journals (*Acta Crystallographica*, *Journal of Applied Crystallography*, *Journal of Synchrotron Radiation*); however, if you intend to submit to *Acta Crystallographica Section C* or *E* or *IUCrData*, you should make sure that full publication checks are run on the final version of your CIF prior to submission.

#### **Publication of your CIF in other journals**

Please refer to the *Notes for Authors* of the relevant journal for any special instructions relating to CIF submission.

---

**PLATON version of 18/05/2022; check.def file version of 17/05/2022**

Datablock maboochun\_0626 - ellipsoid plot

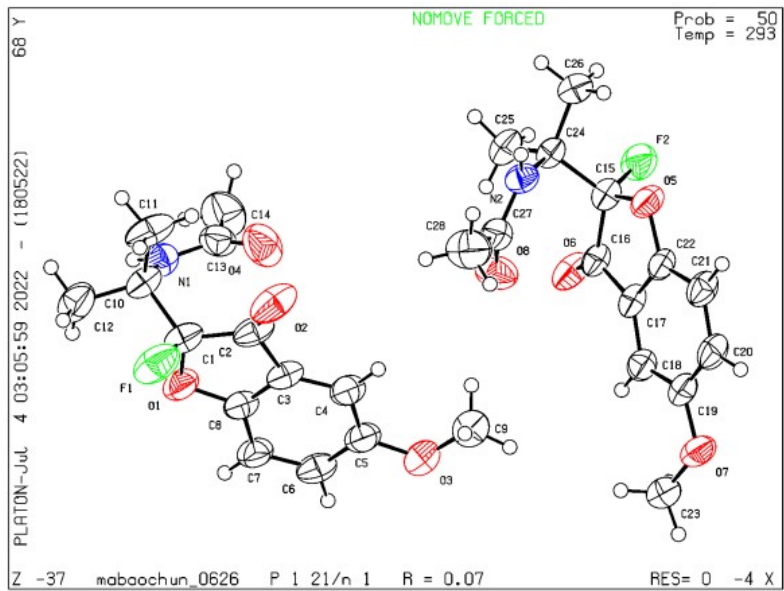

Spectrum of  $^1\text{H}$  NMR

(1a)

$^1\text{H}$  NMR

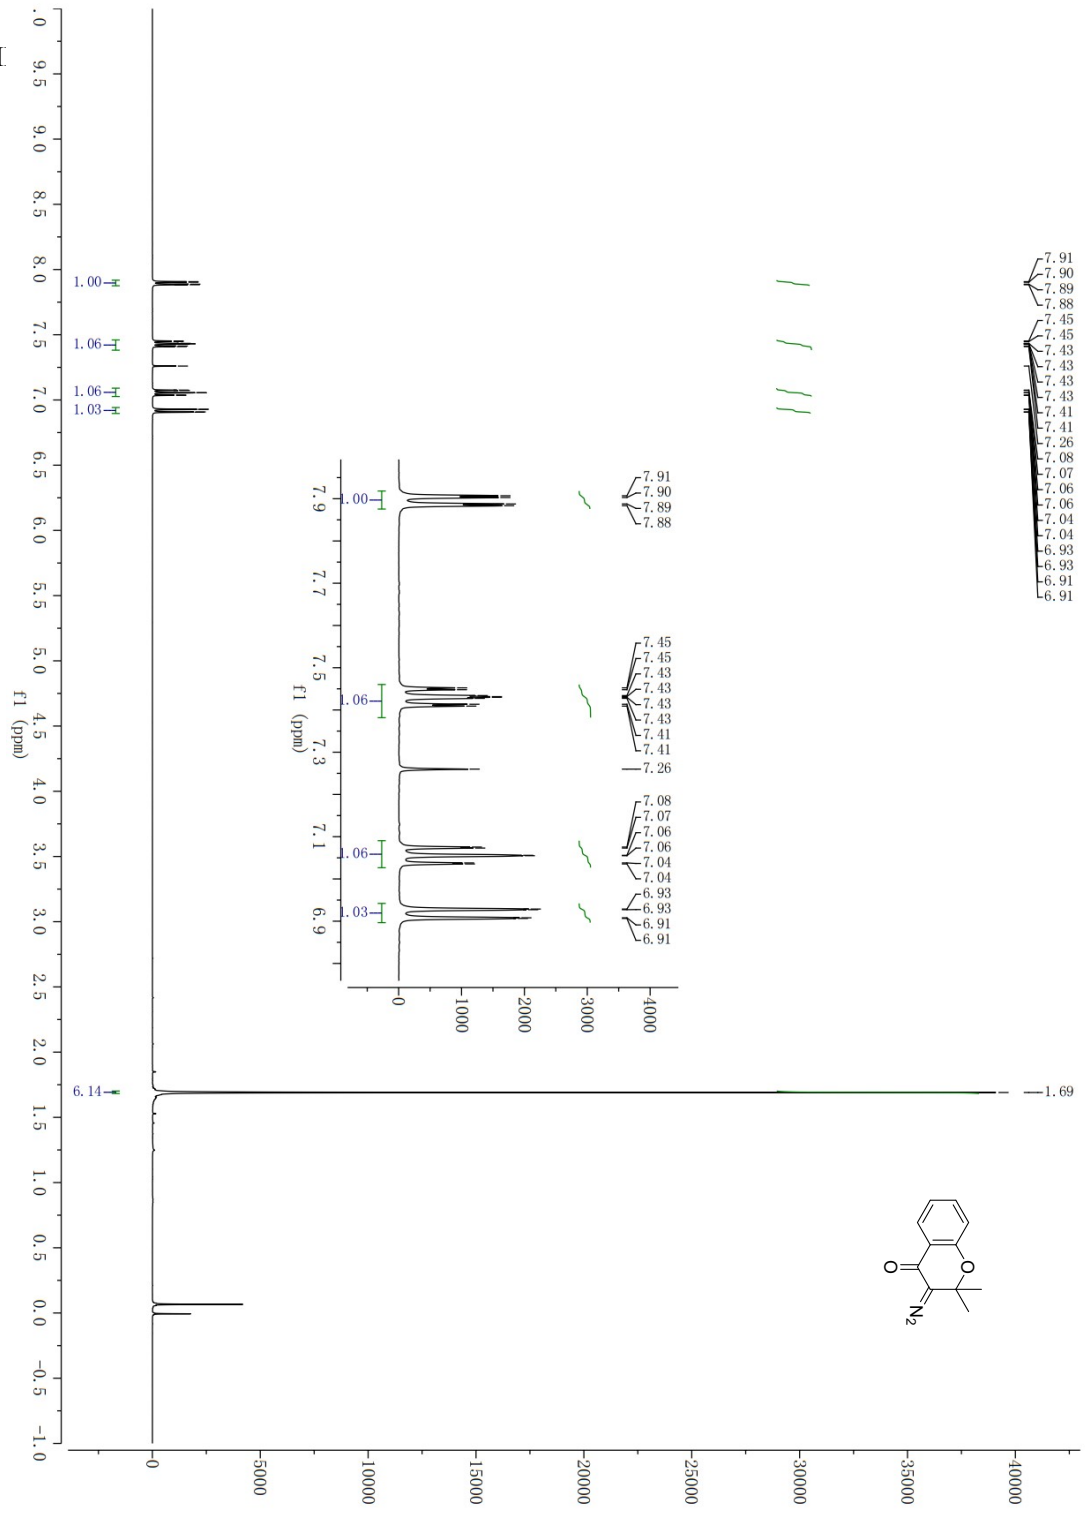

<sup>13</sup>C NMR

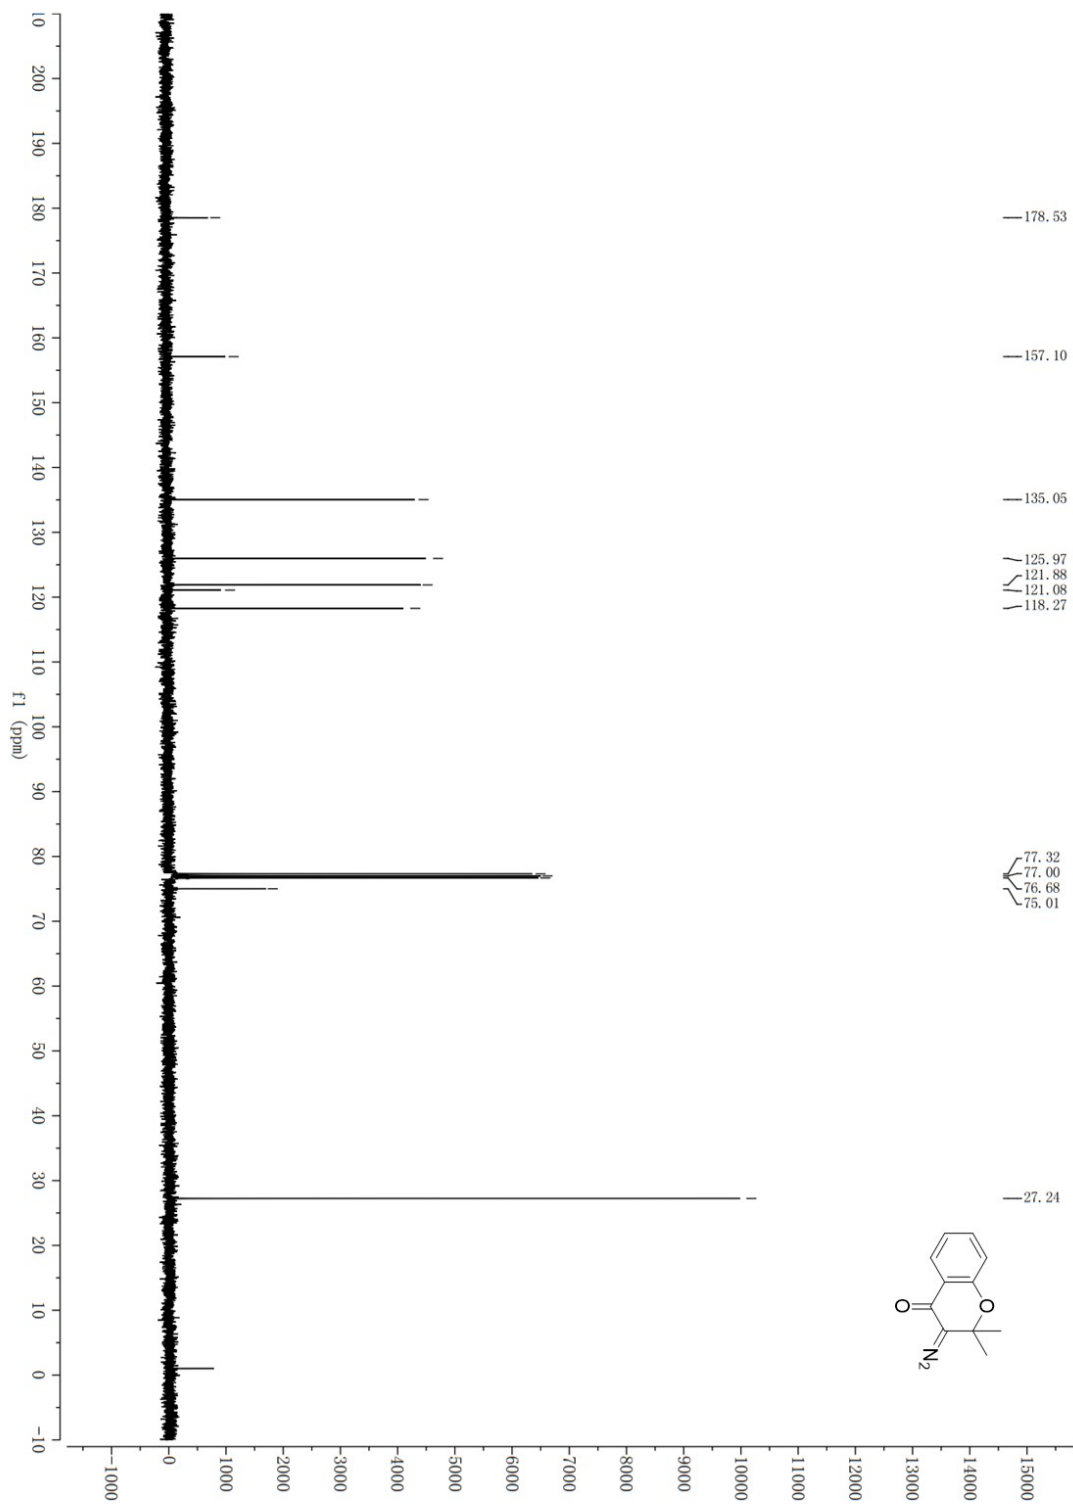

**(1b)**  
<sup>1</sup>H NMR

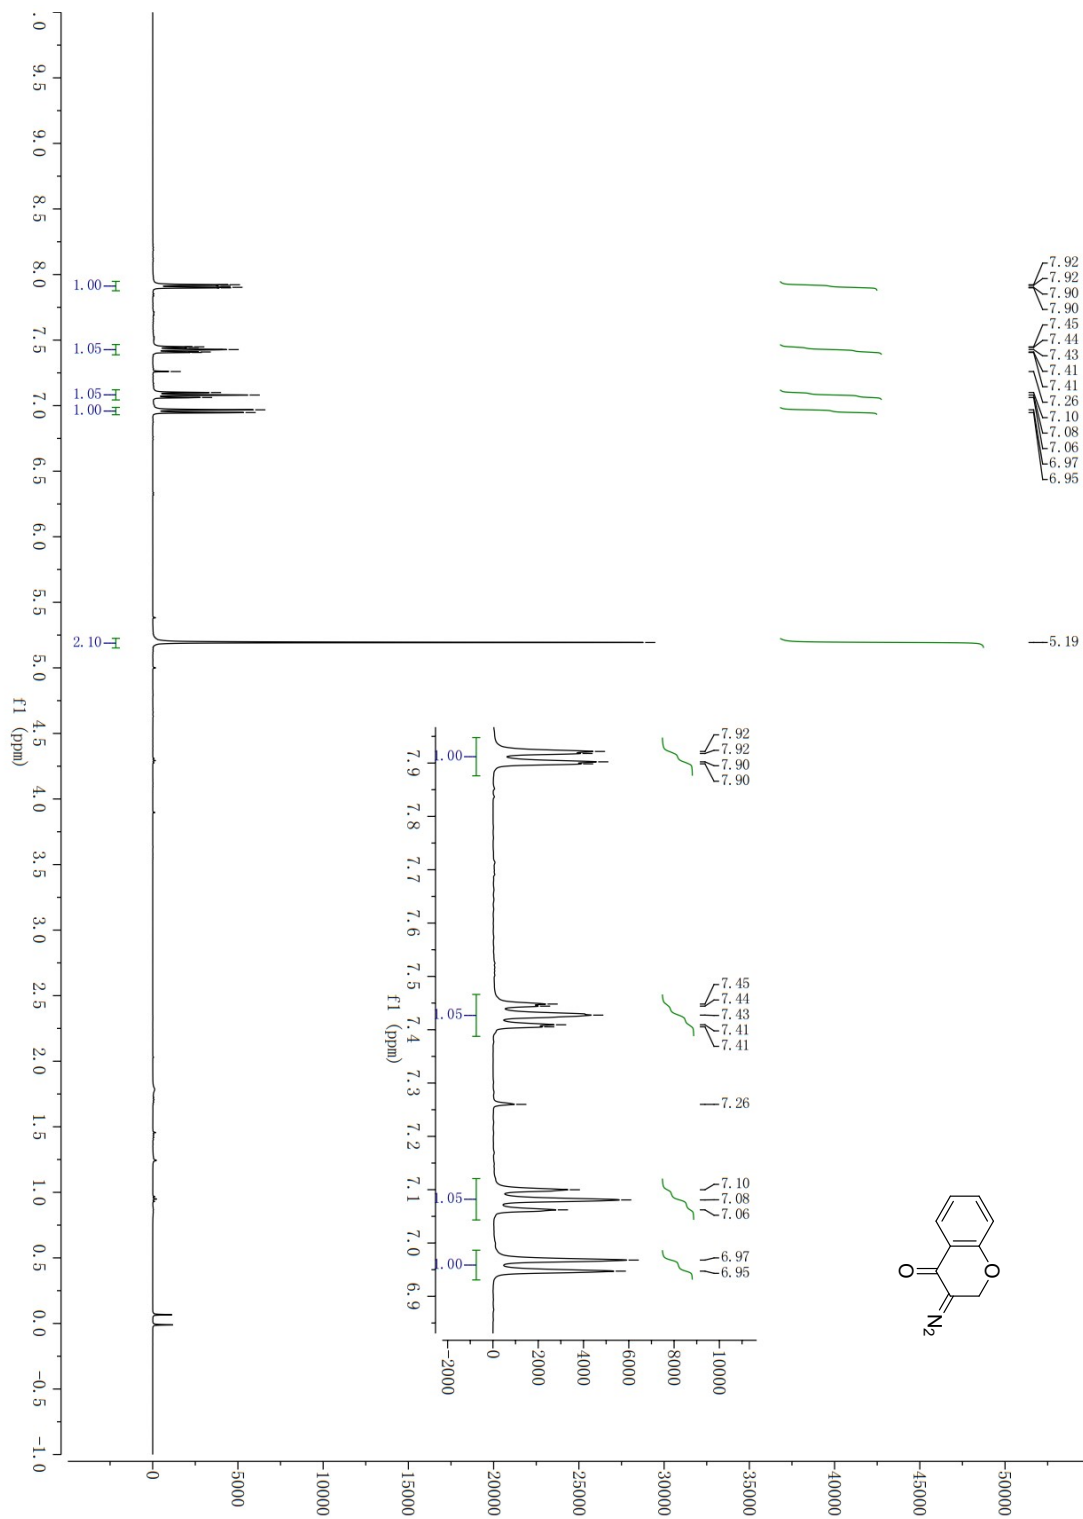



<sup>13</sup>C NMR

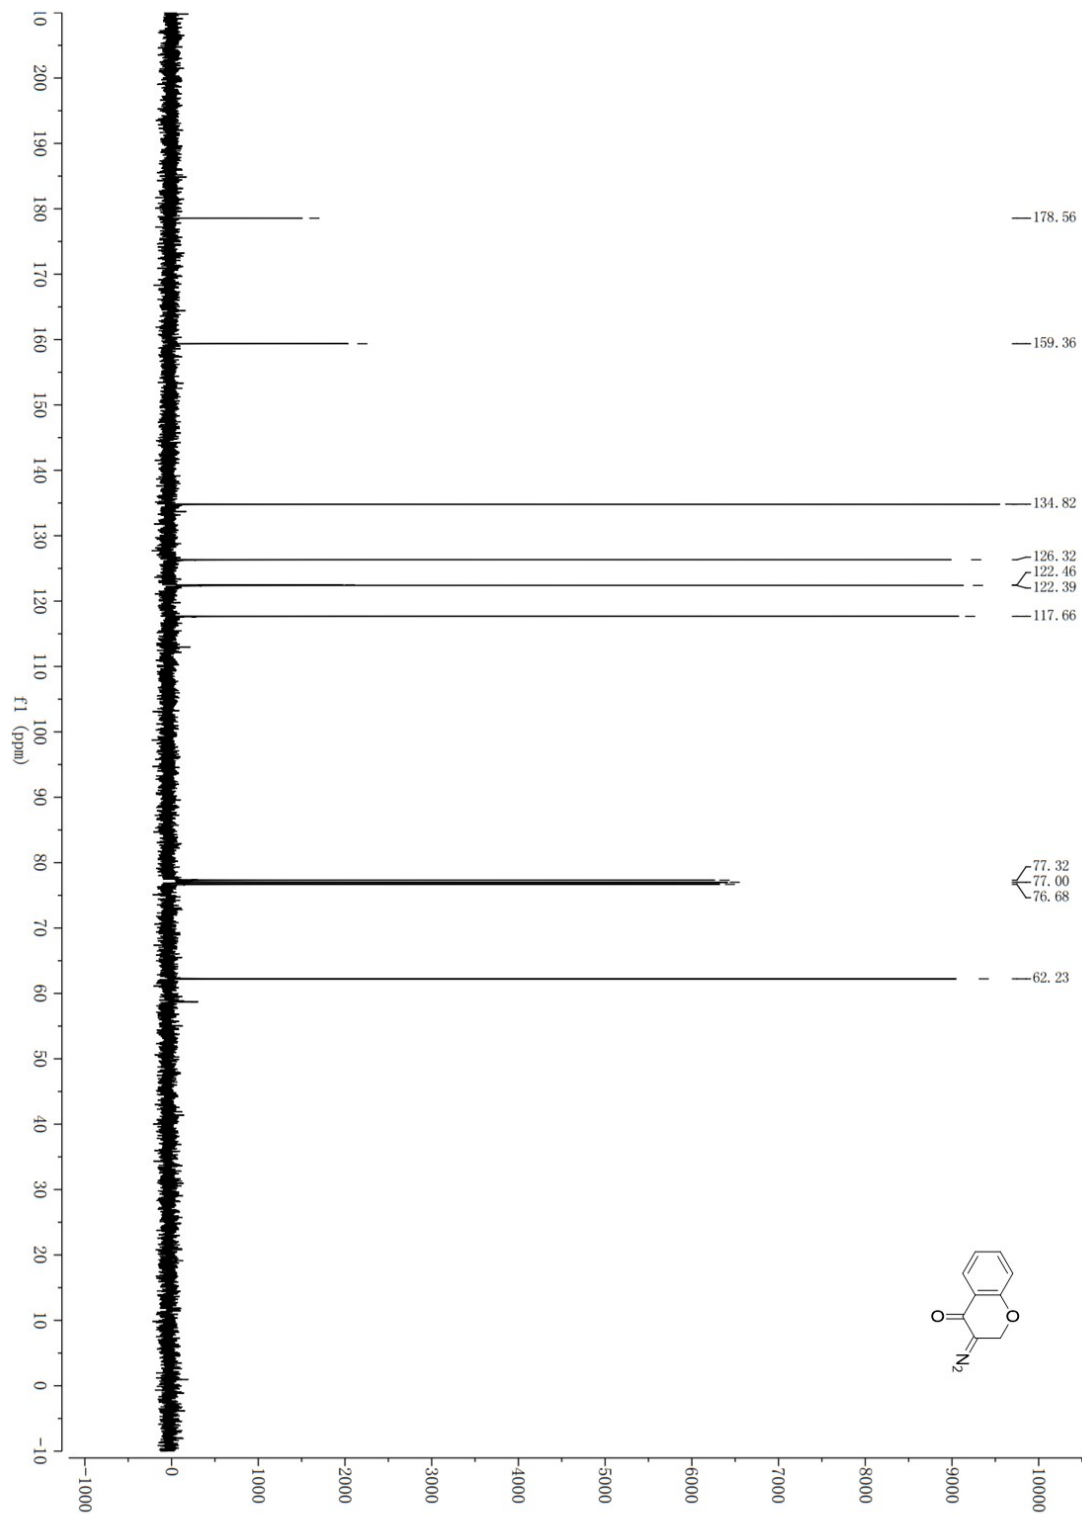

**(1c)**  
<sup>1</sup>H NMR

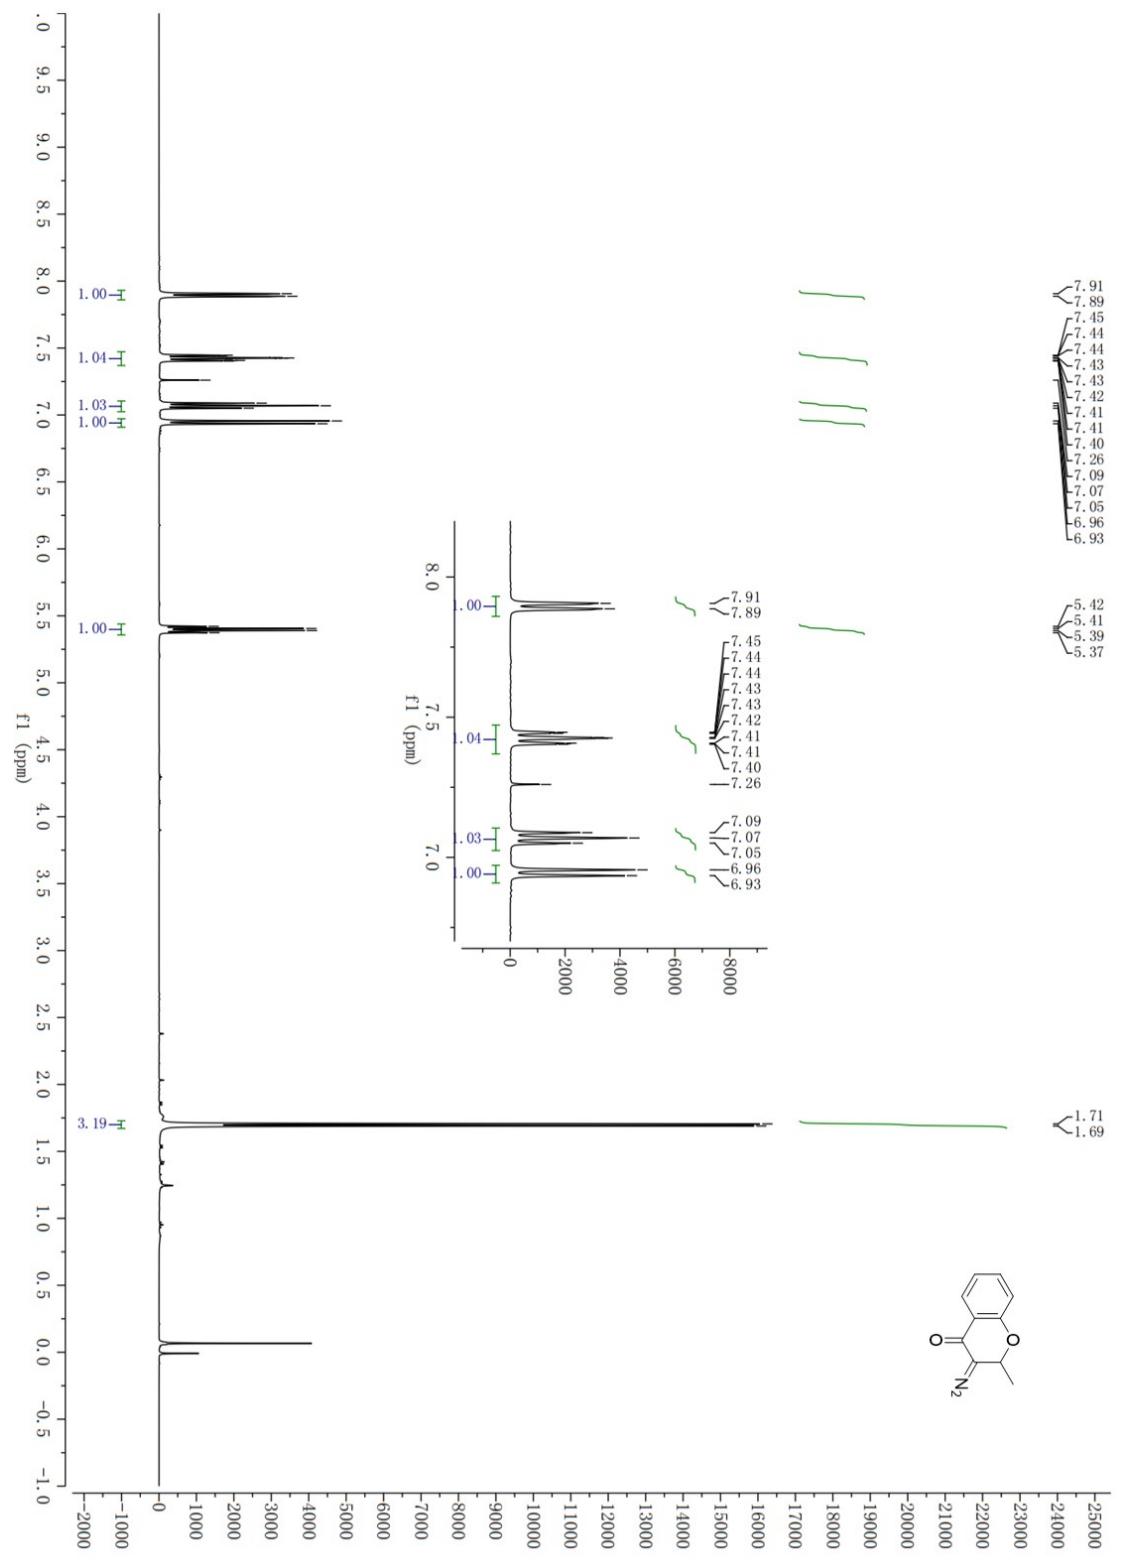

<sup>13</sup>C NMR

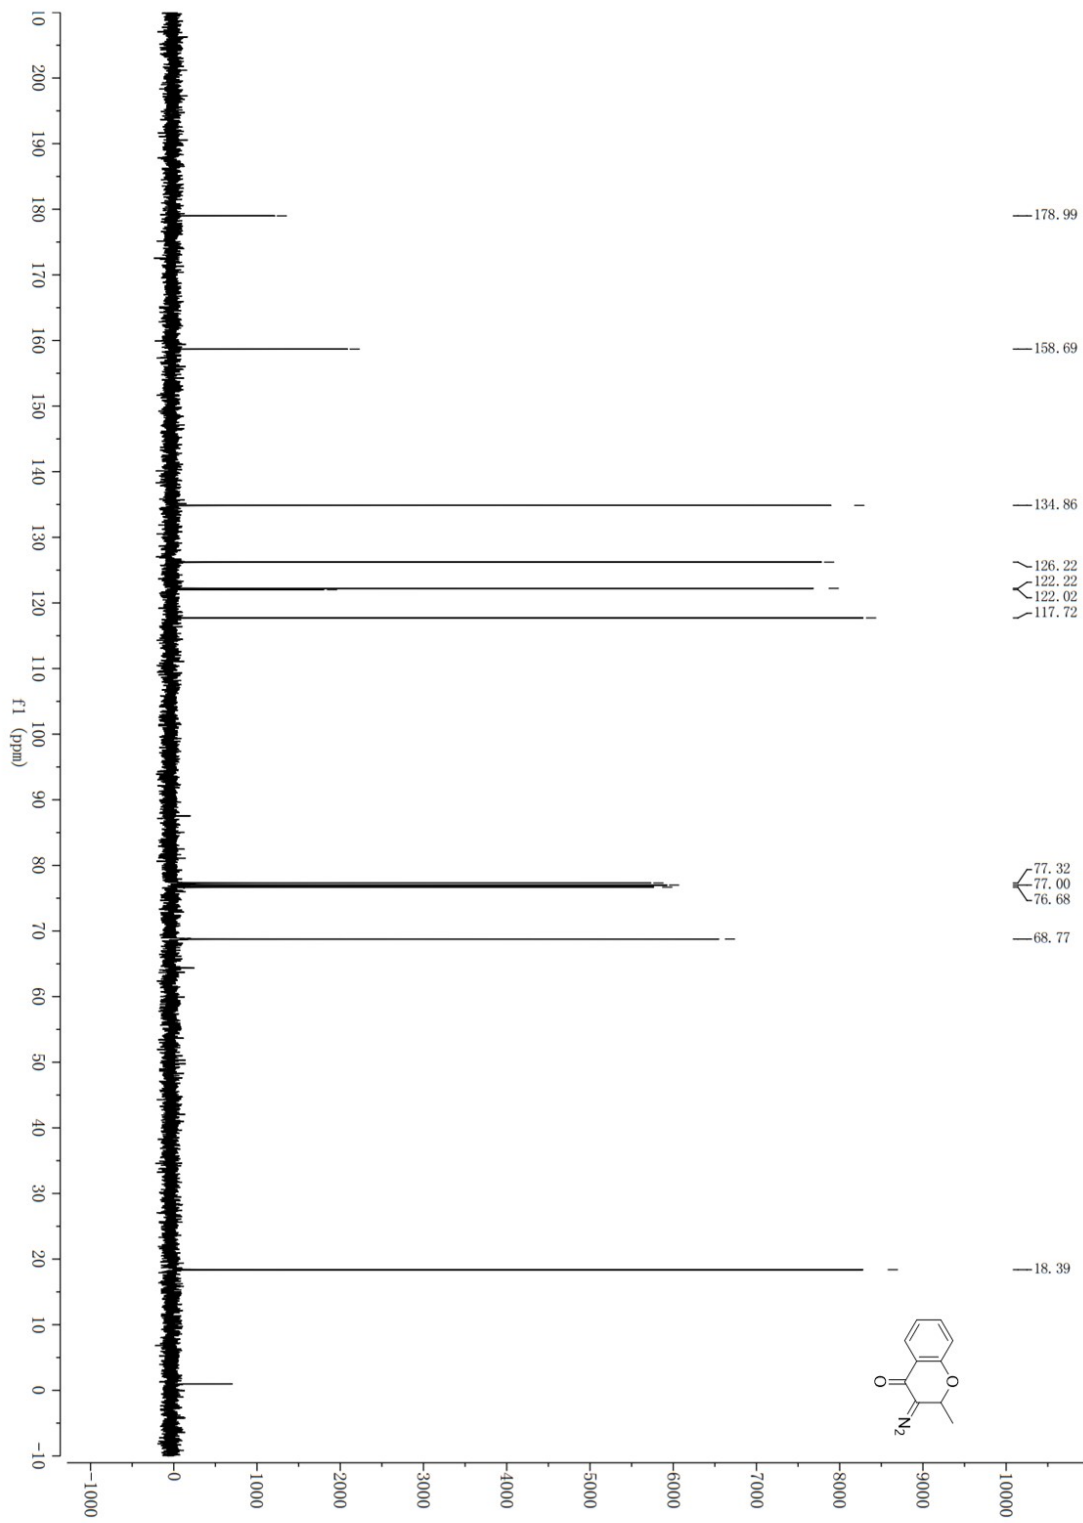

**(1d)**  
<sup>1</sup>H NMR

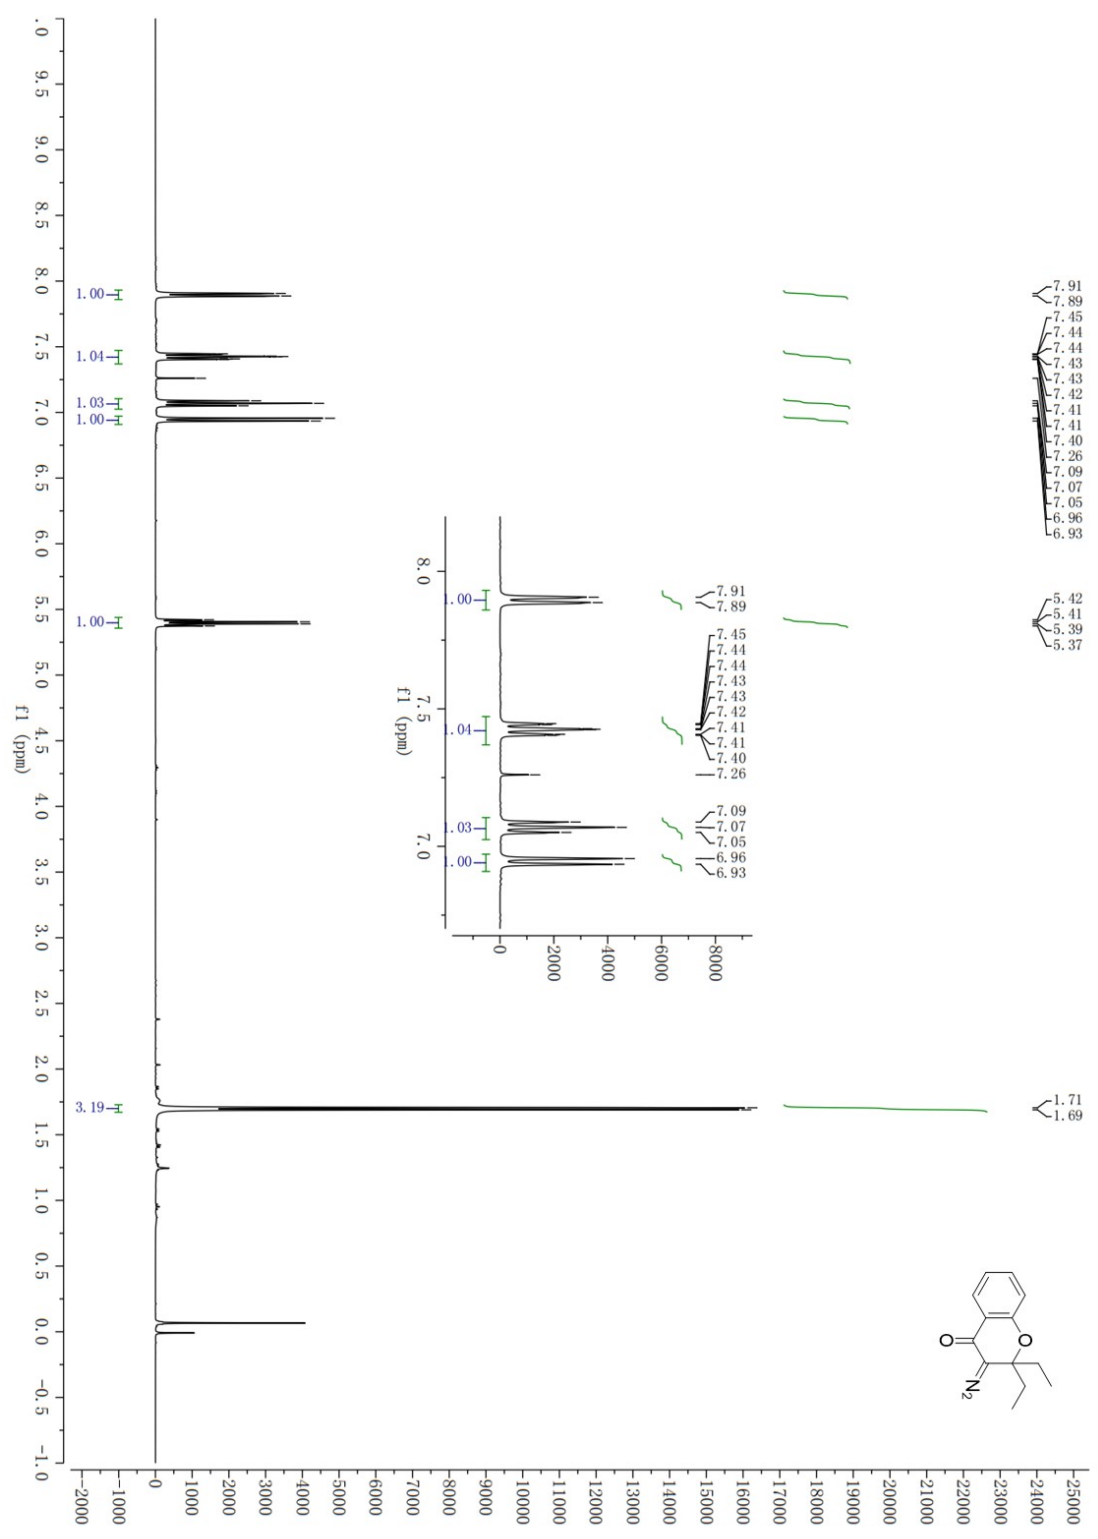

$^{13}\text{C}$  NMR

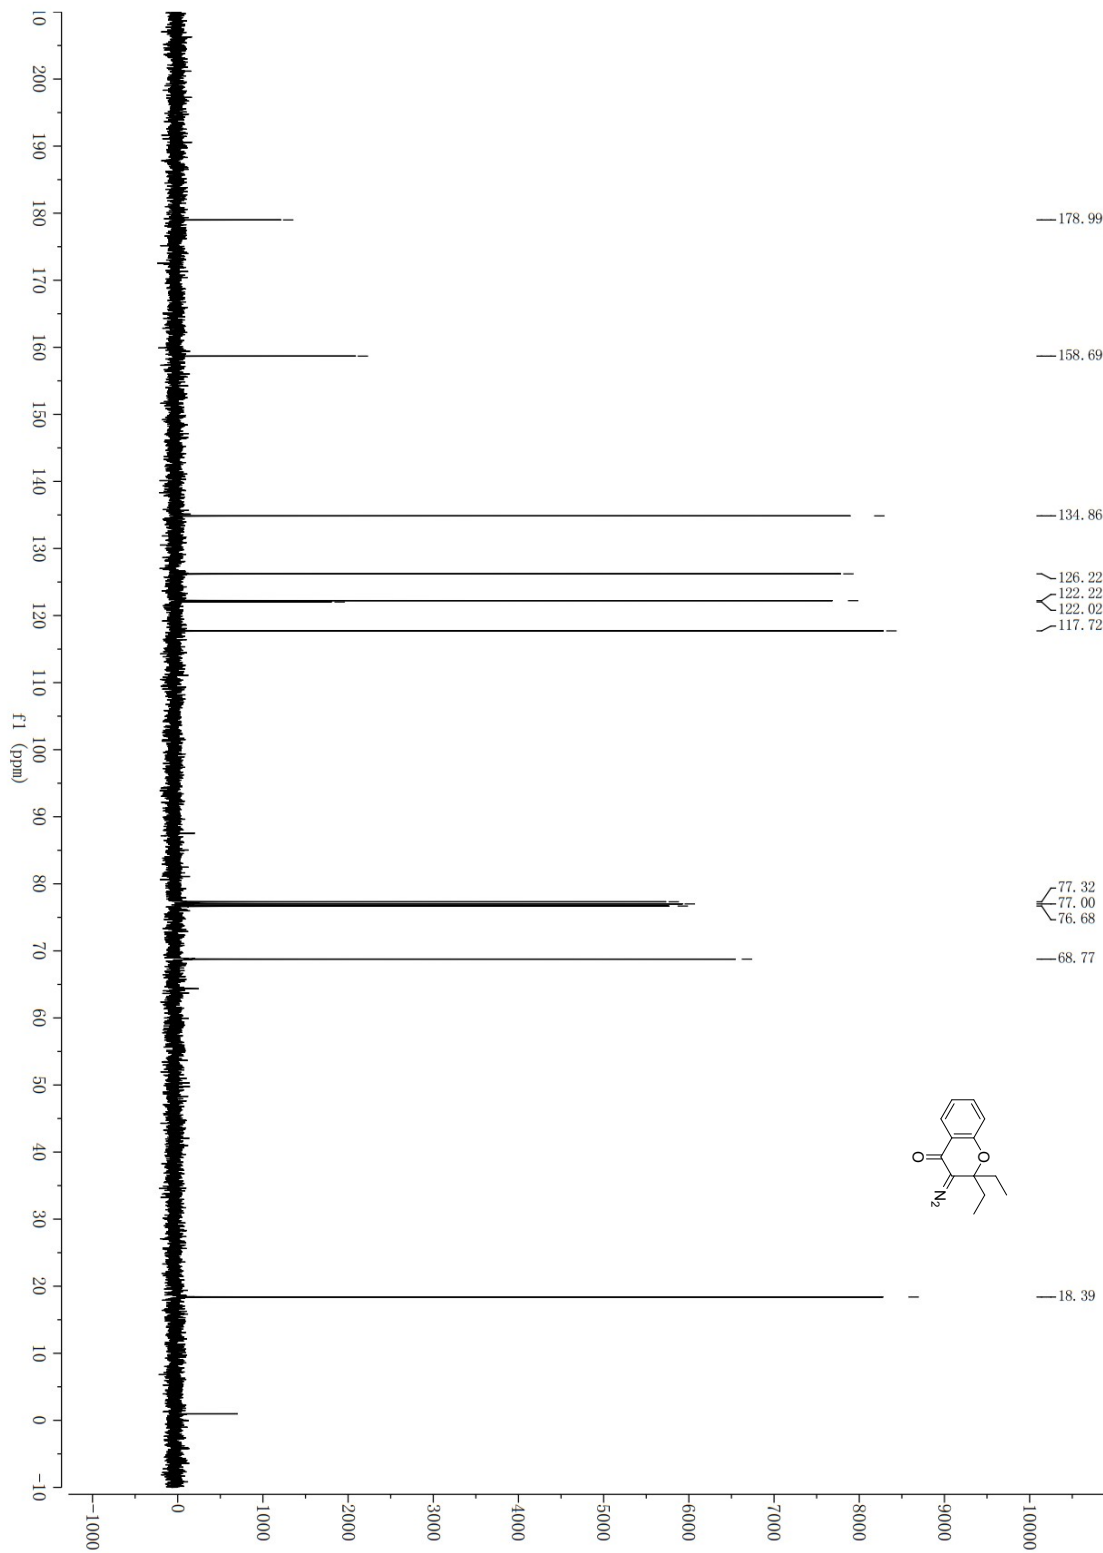

**(1e)**

$^1\text{H}$  NMR

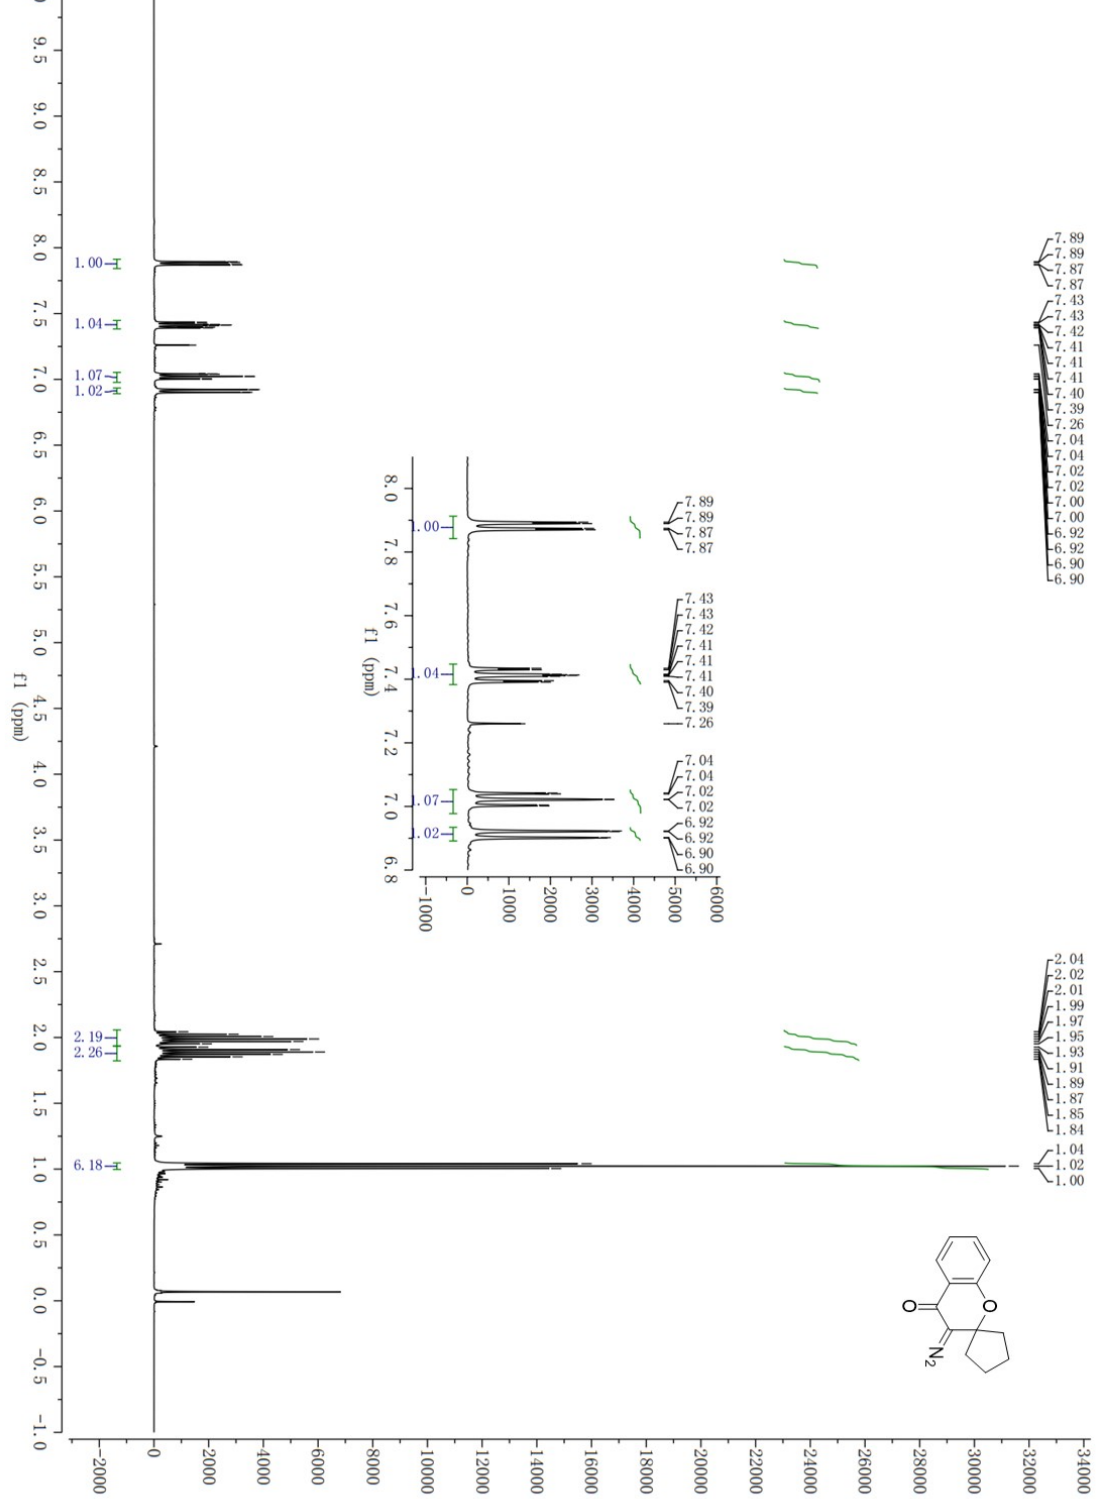

<sup>13</sup>C NMR

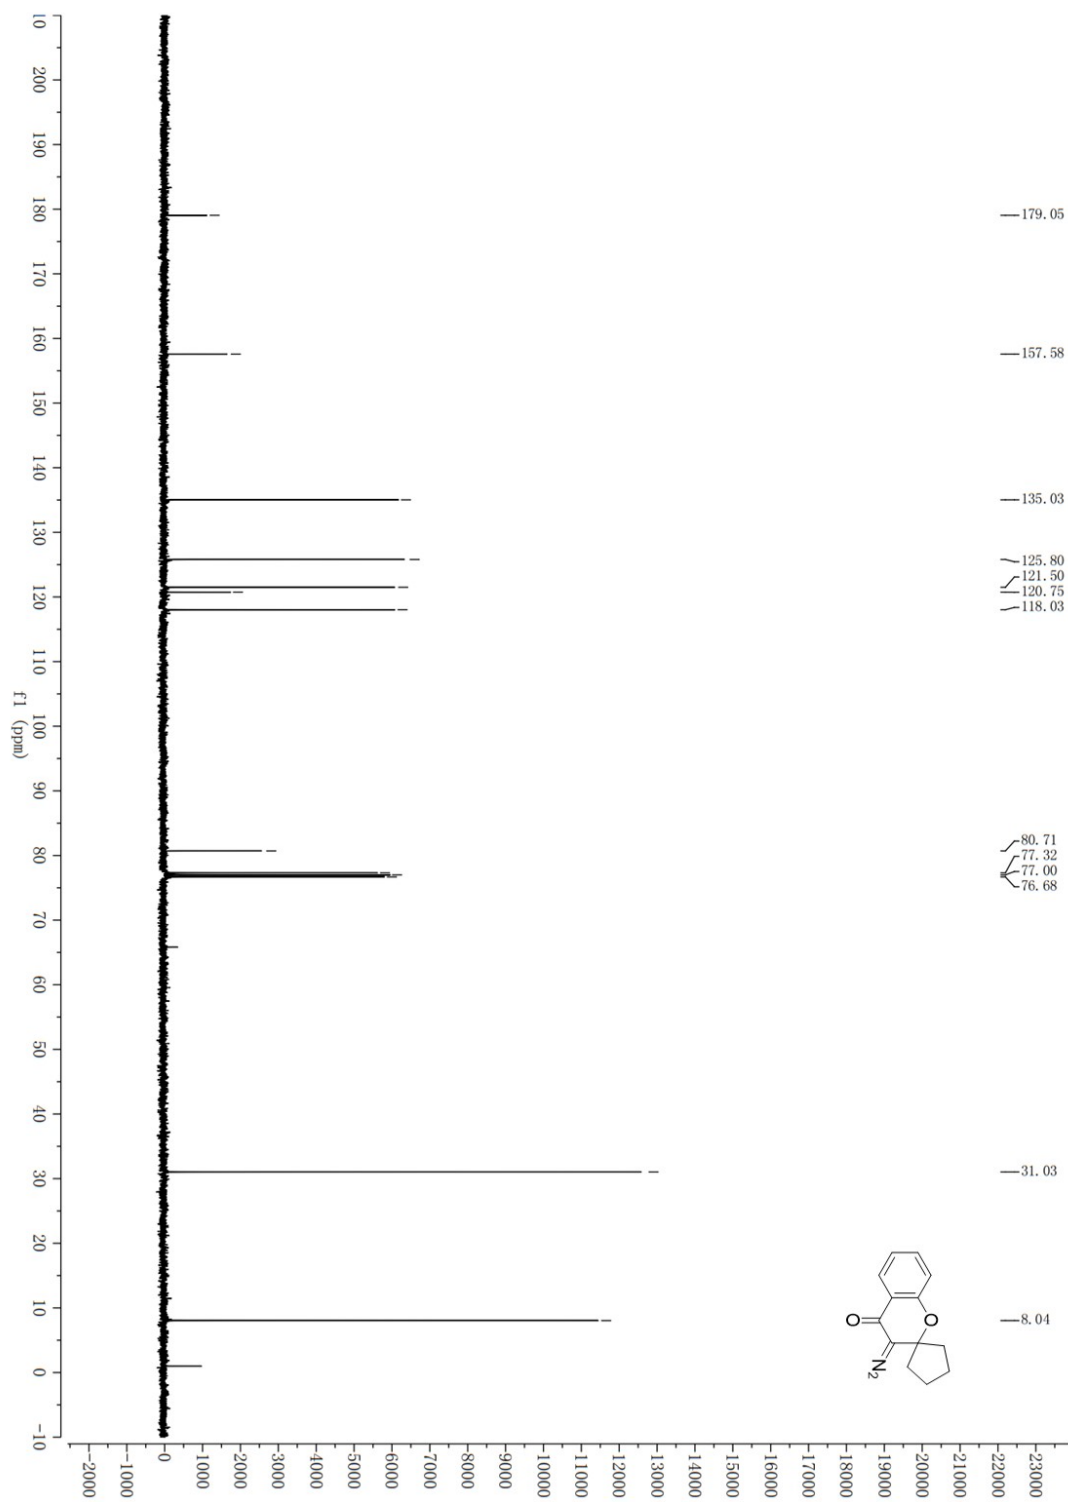

**(1f)**  
<sup>1</sup>H NMR

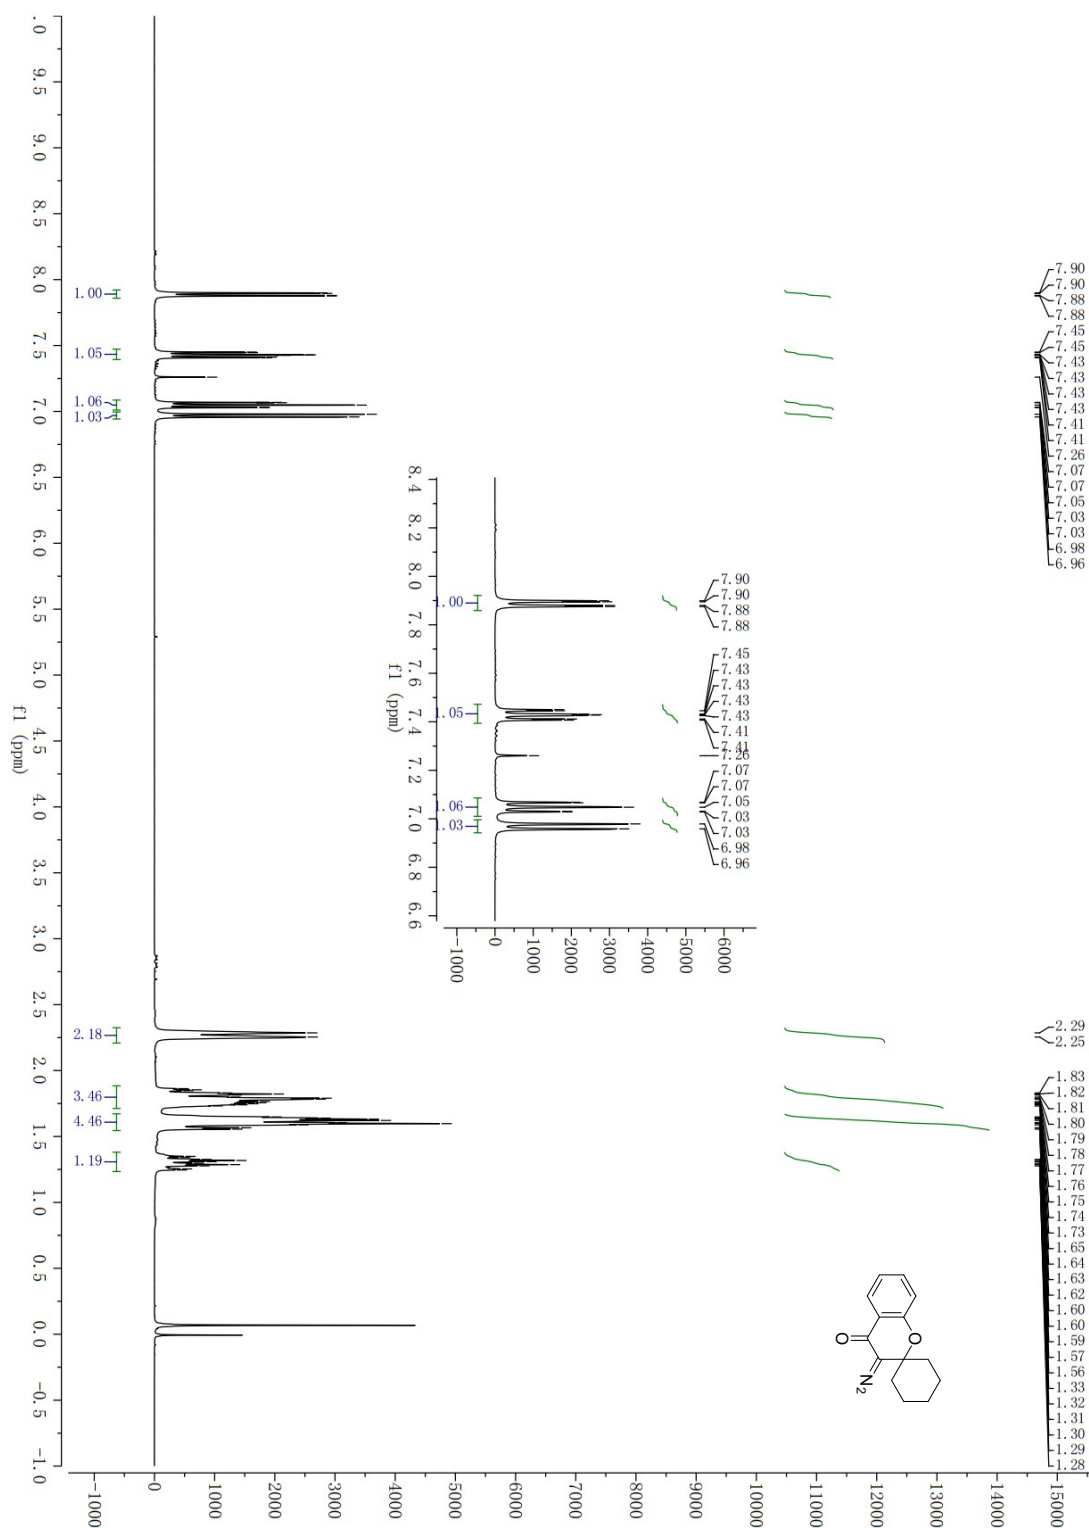



<sup>13</sup>C NMR

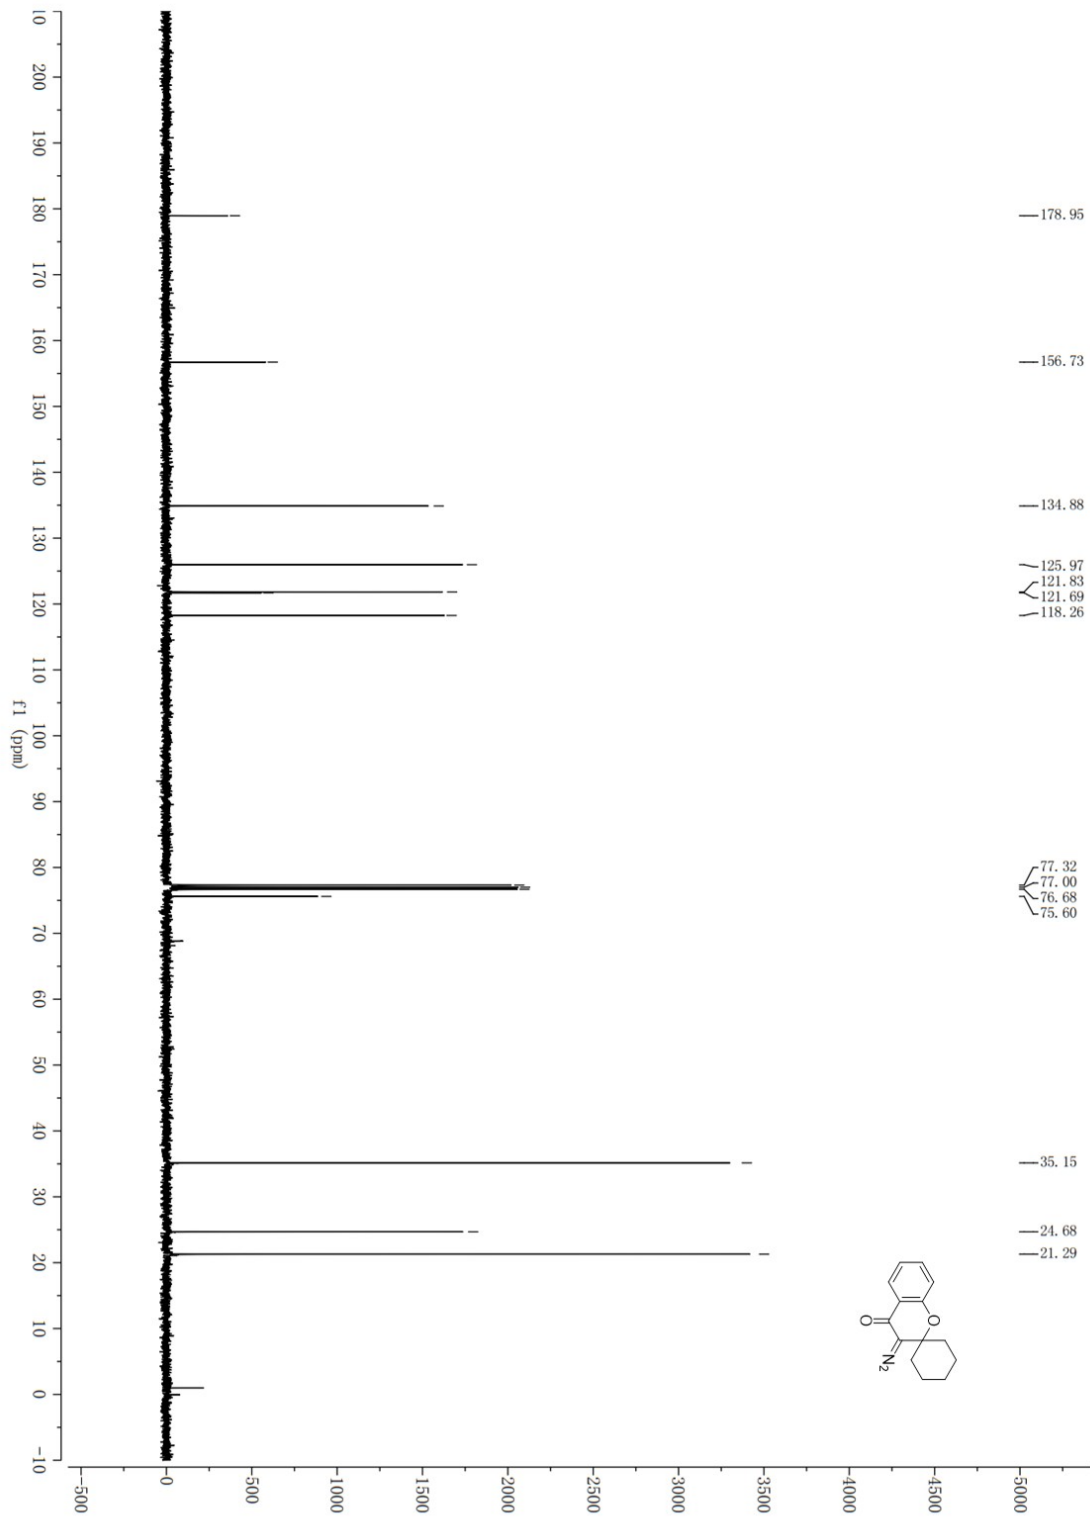

**(1g)**  
<sup>1</sup>H NMR

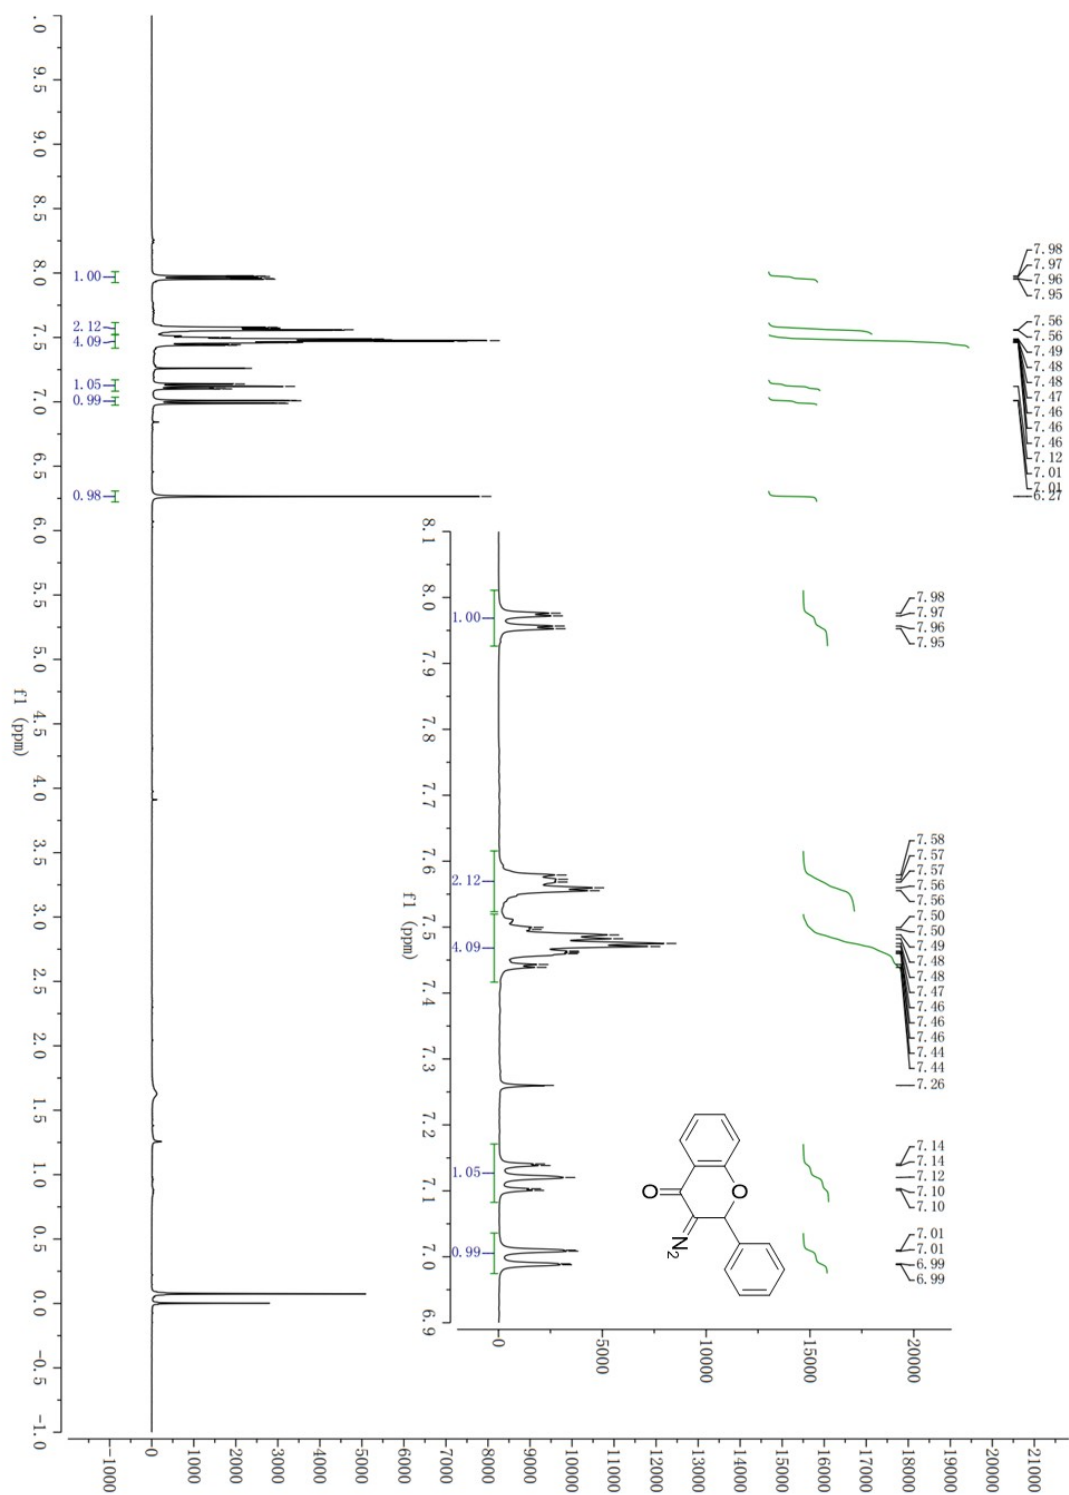

<sup>13</sup>C NMR

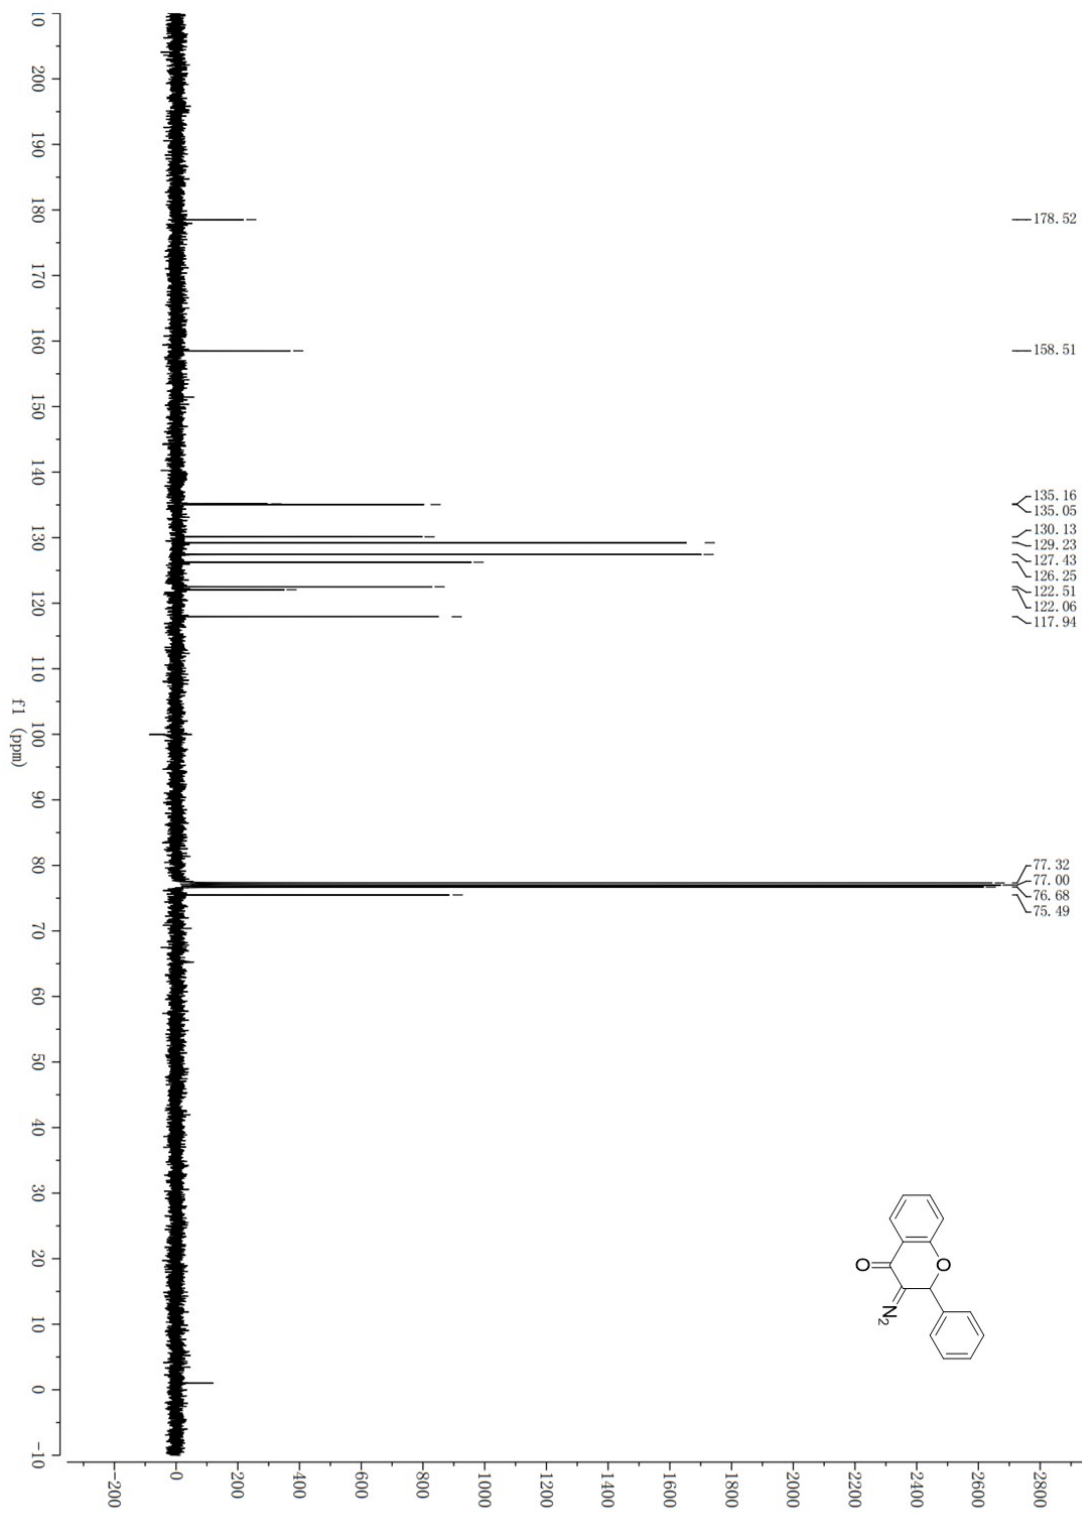

**(1h)**  
<sup>1</sup>H NMR

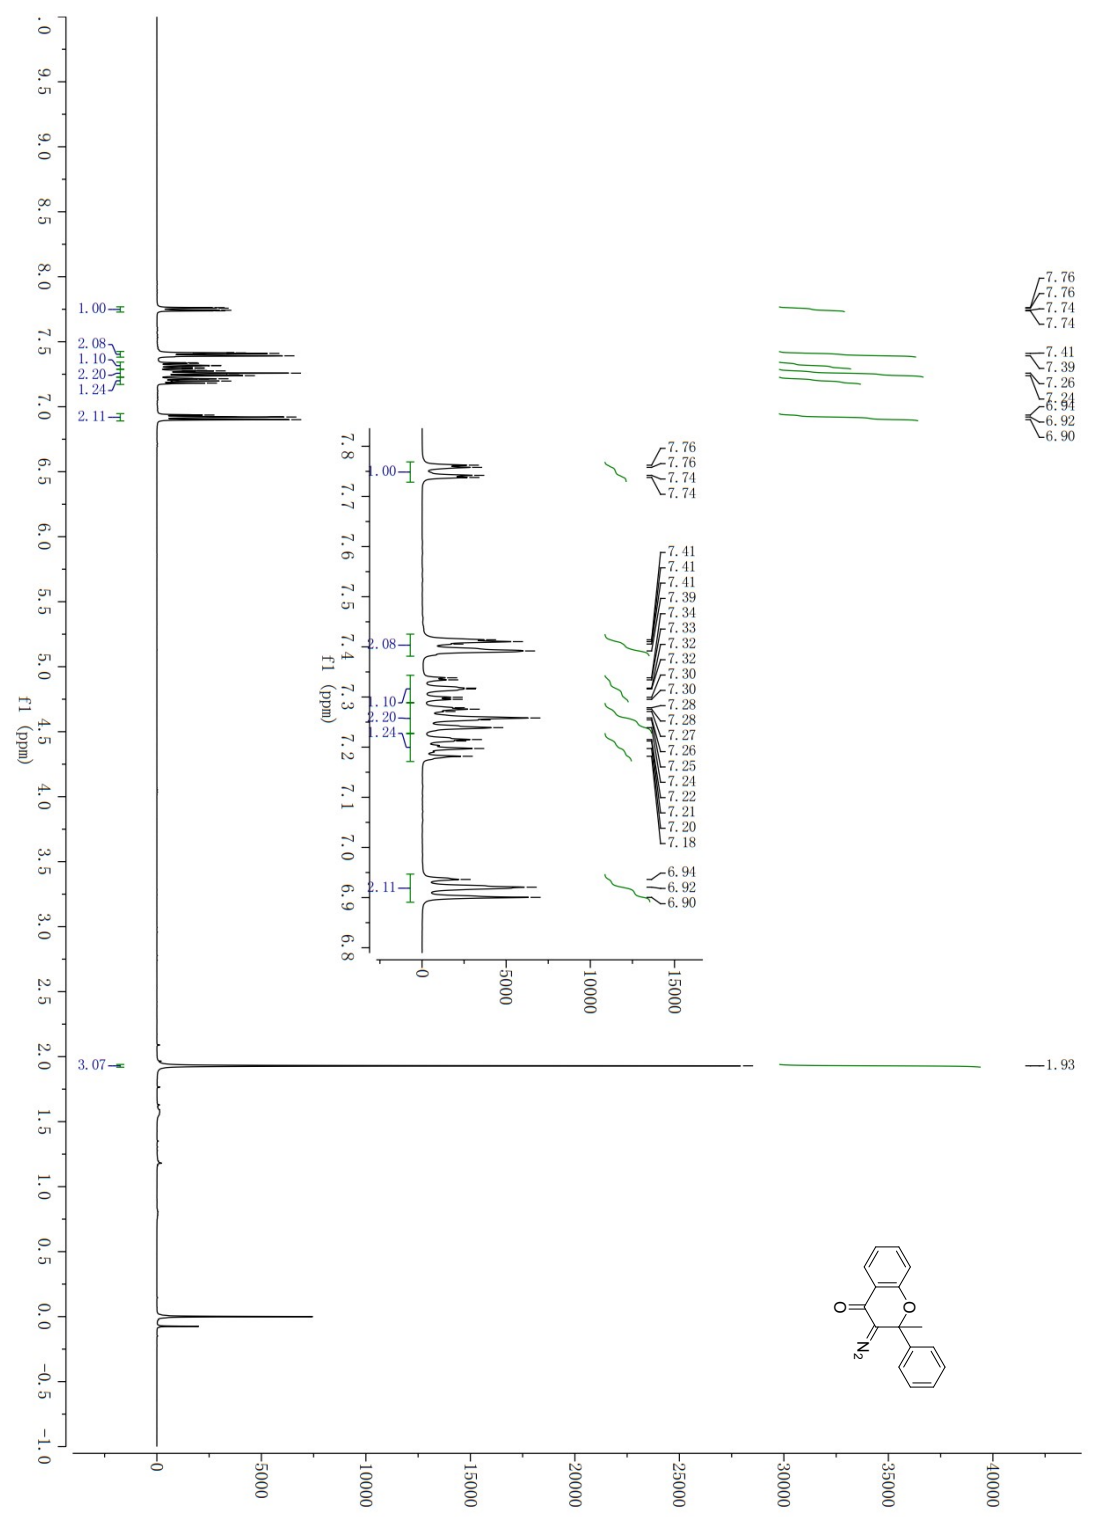

<sup>13</sup>C NMR

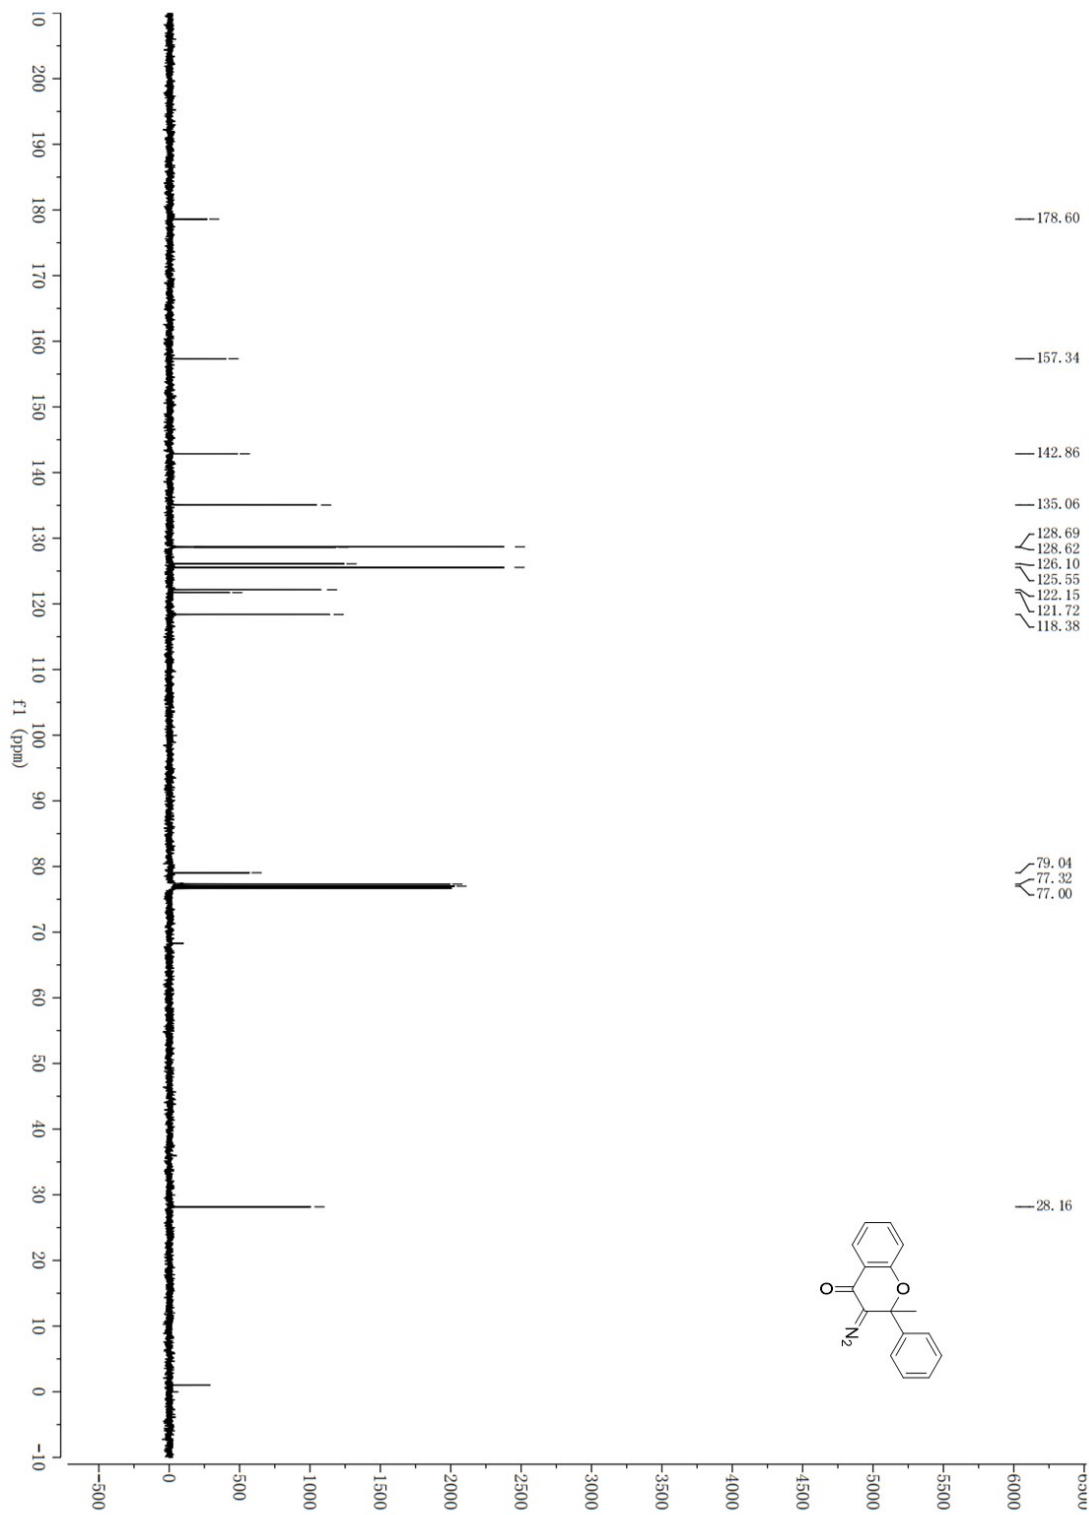

**(1i)**  
<sup>1</sup>H NMR

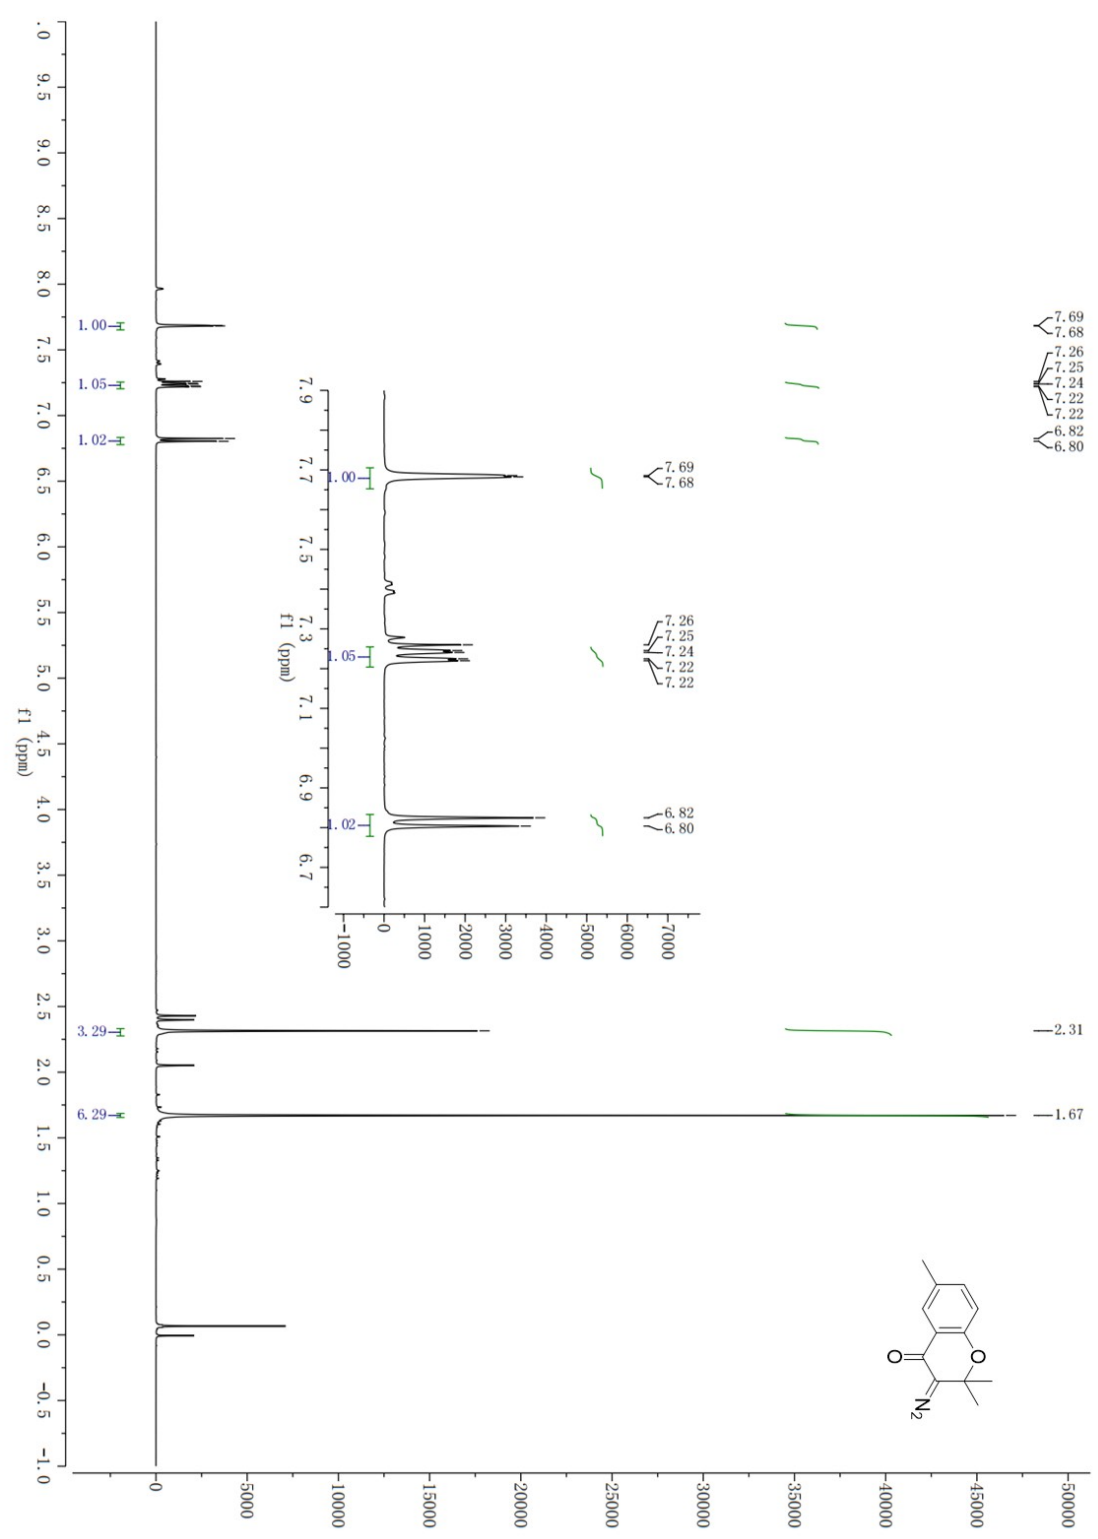

<sup>13</sup>C NMR

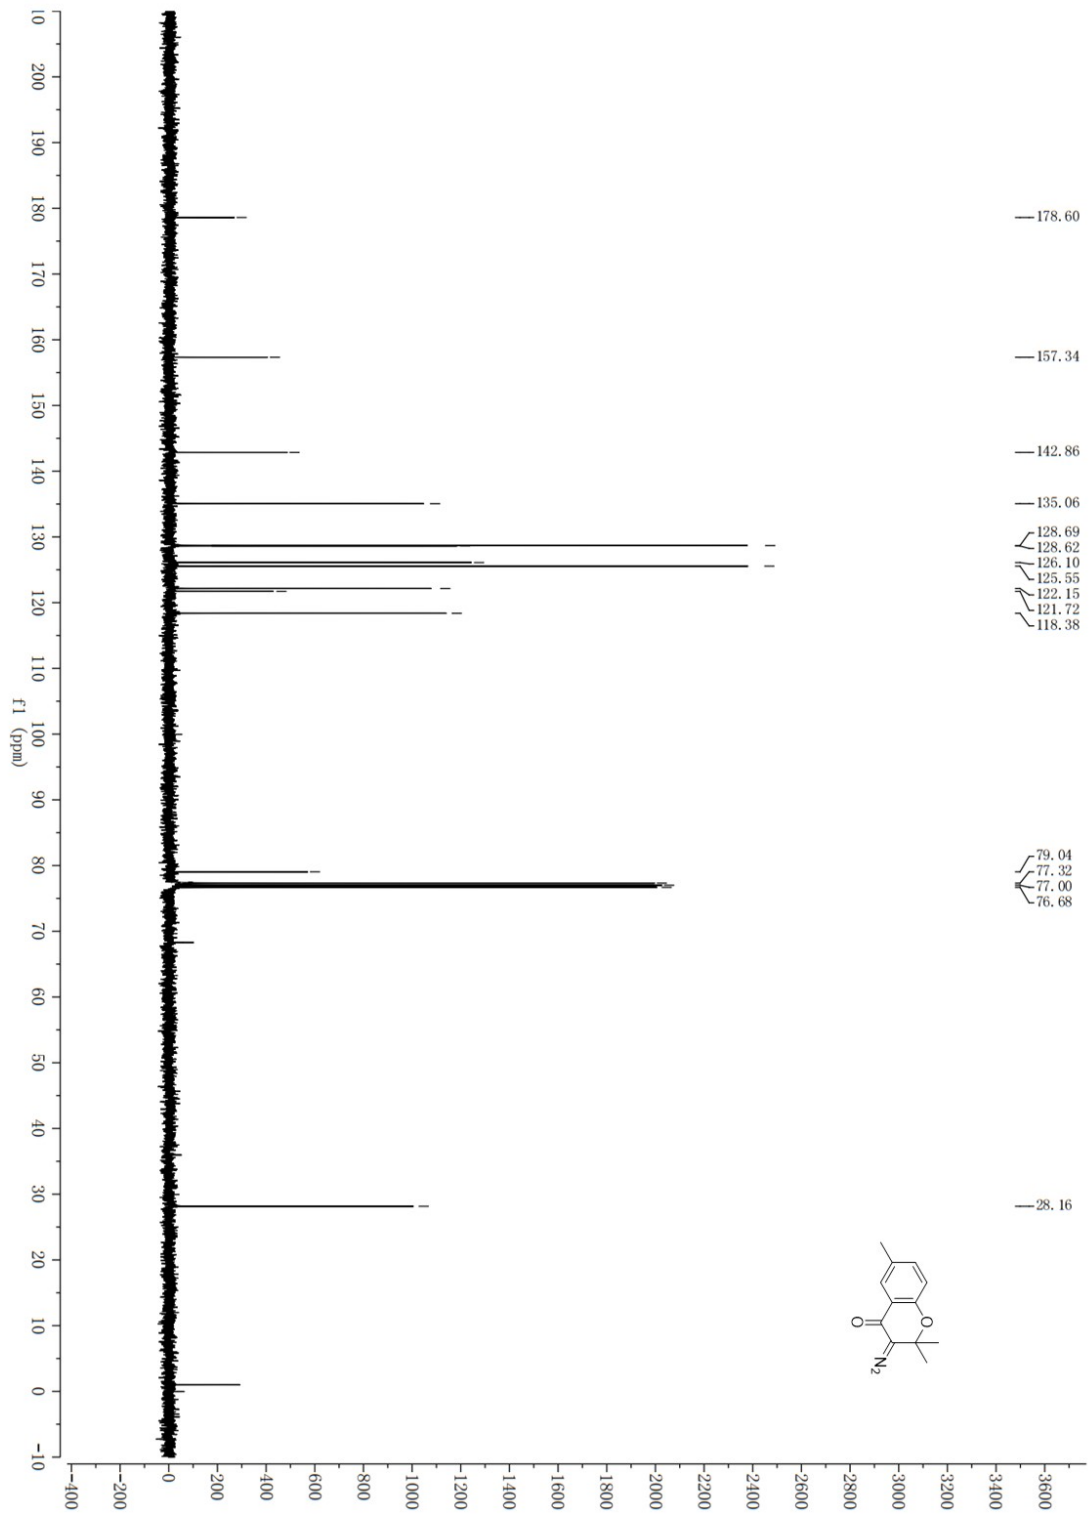

**(1j)**  
<sup>1</sup>H NMR

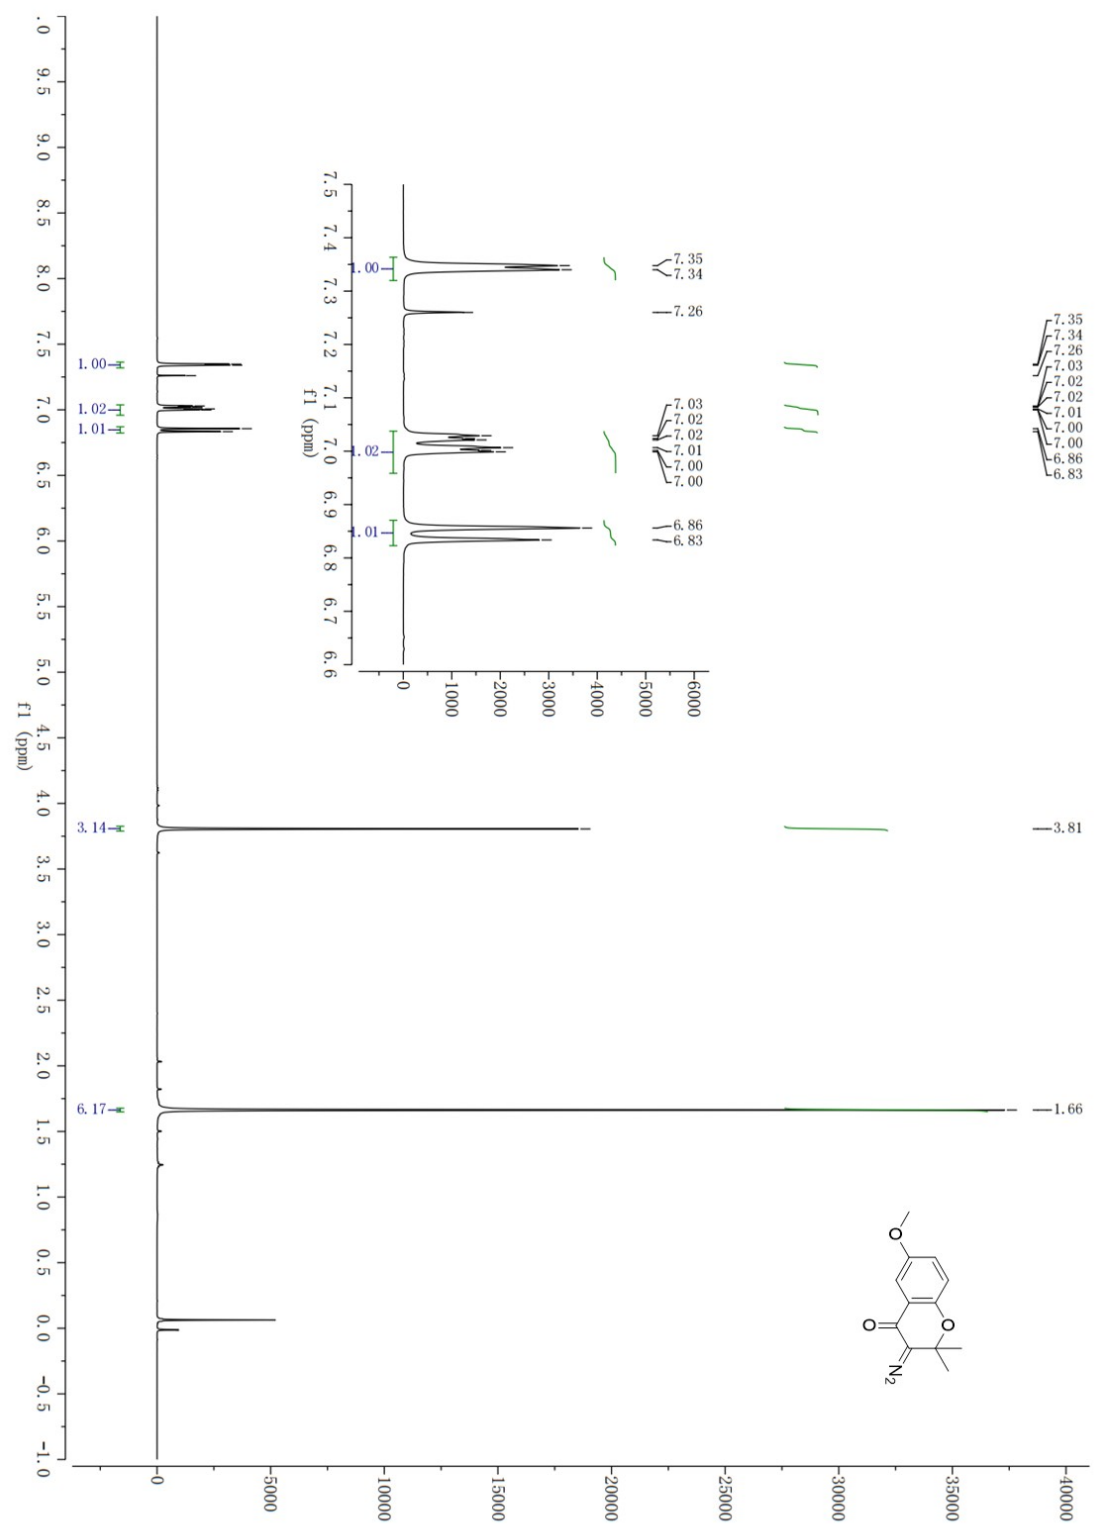



<sup>13</sup>C NMR

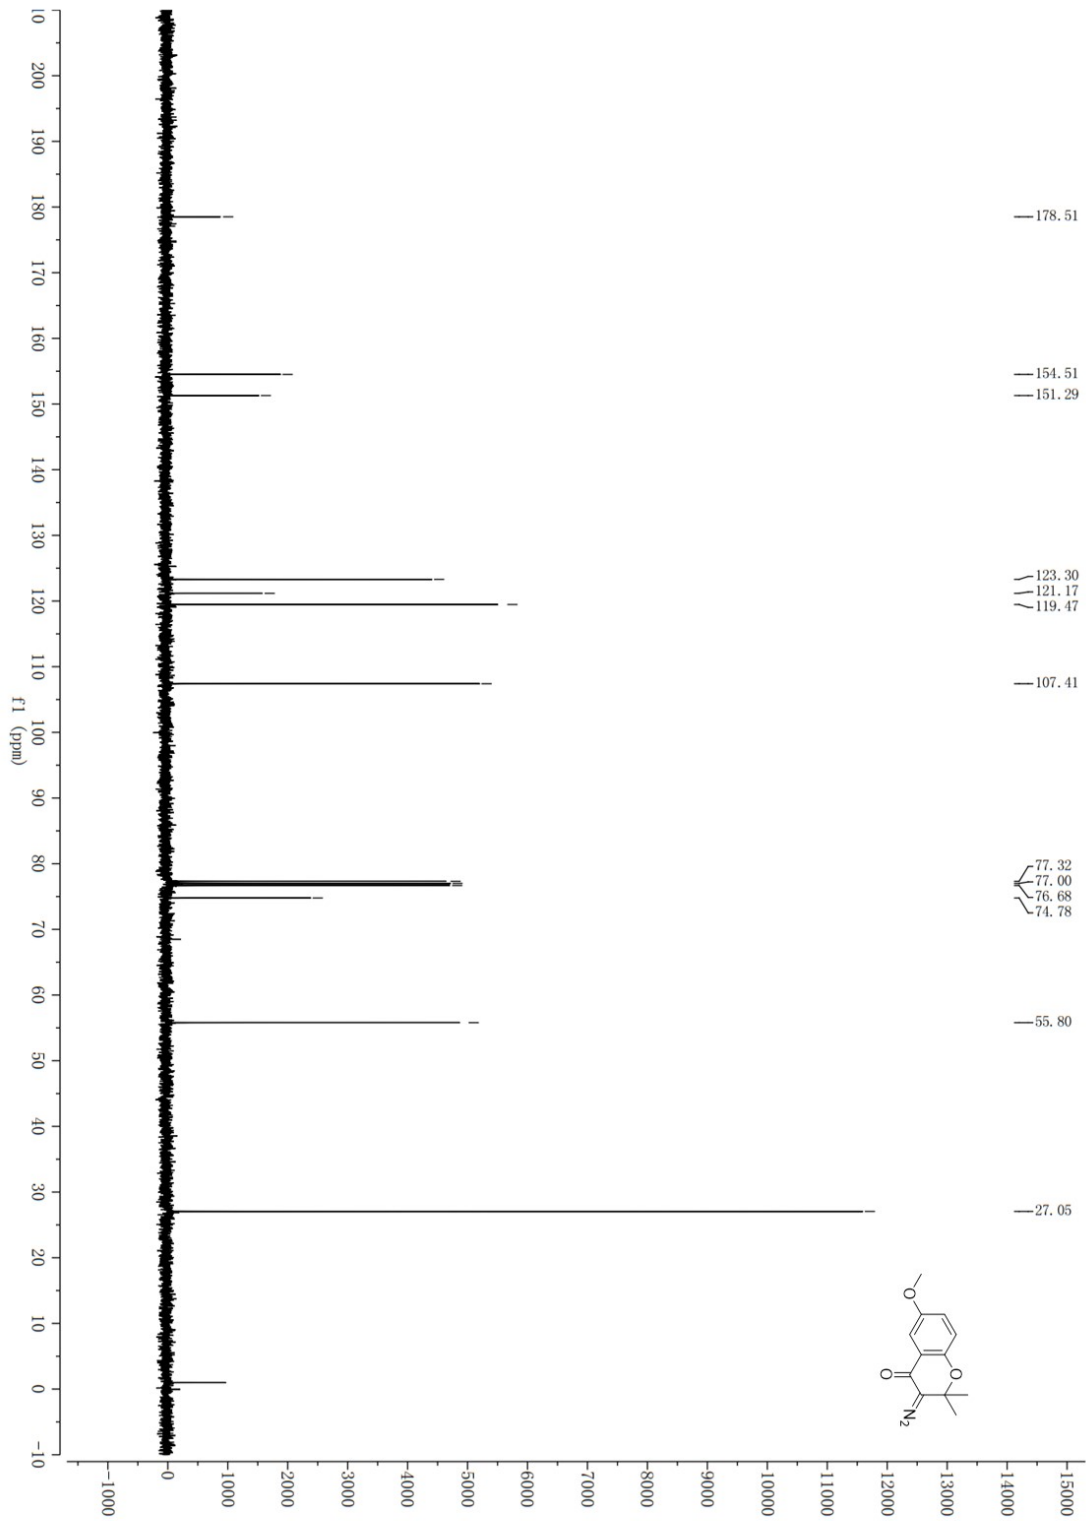

**(1k)**  
<sup>1</sup>H NMR

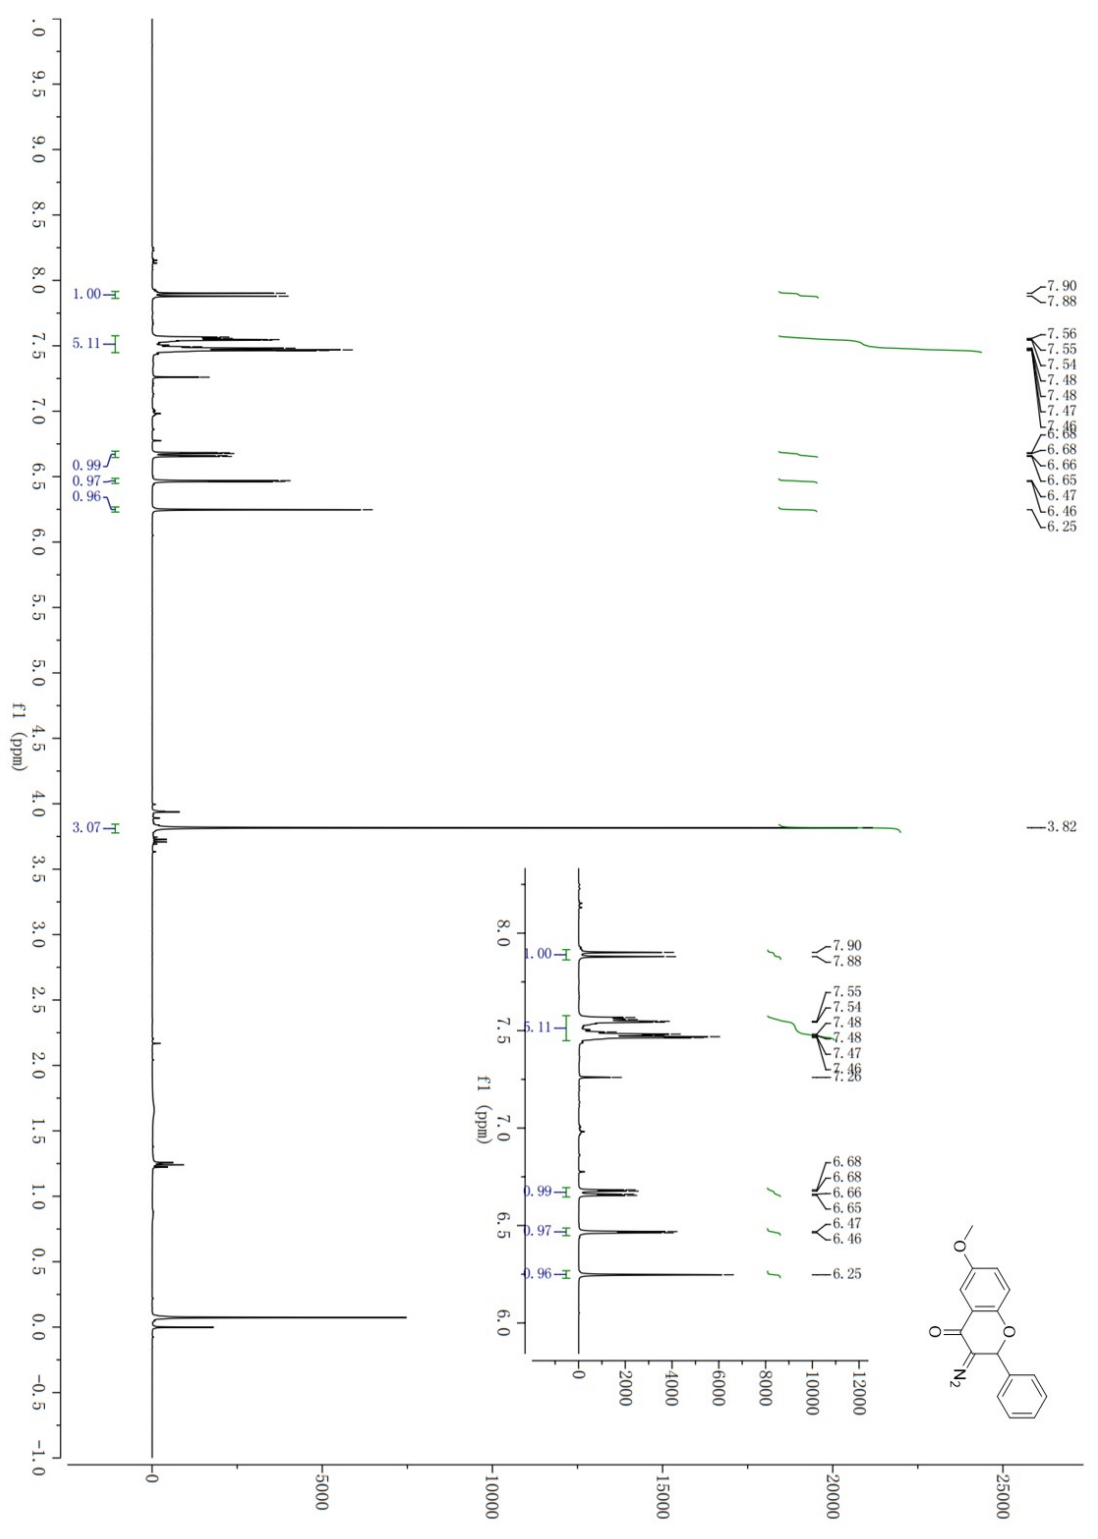

<sup>13</sup>C NMR

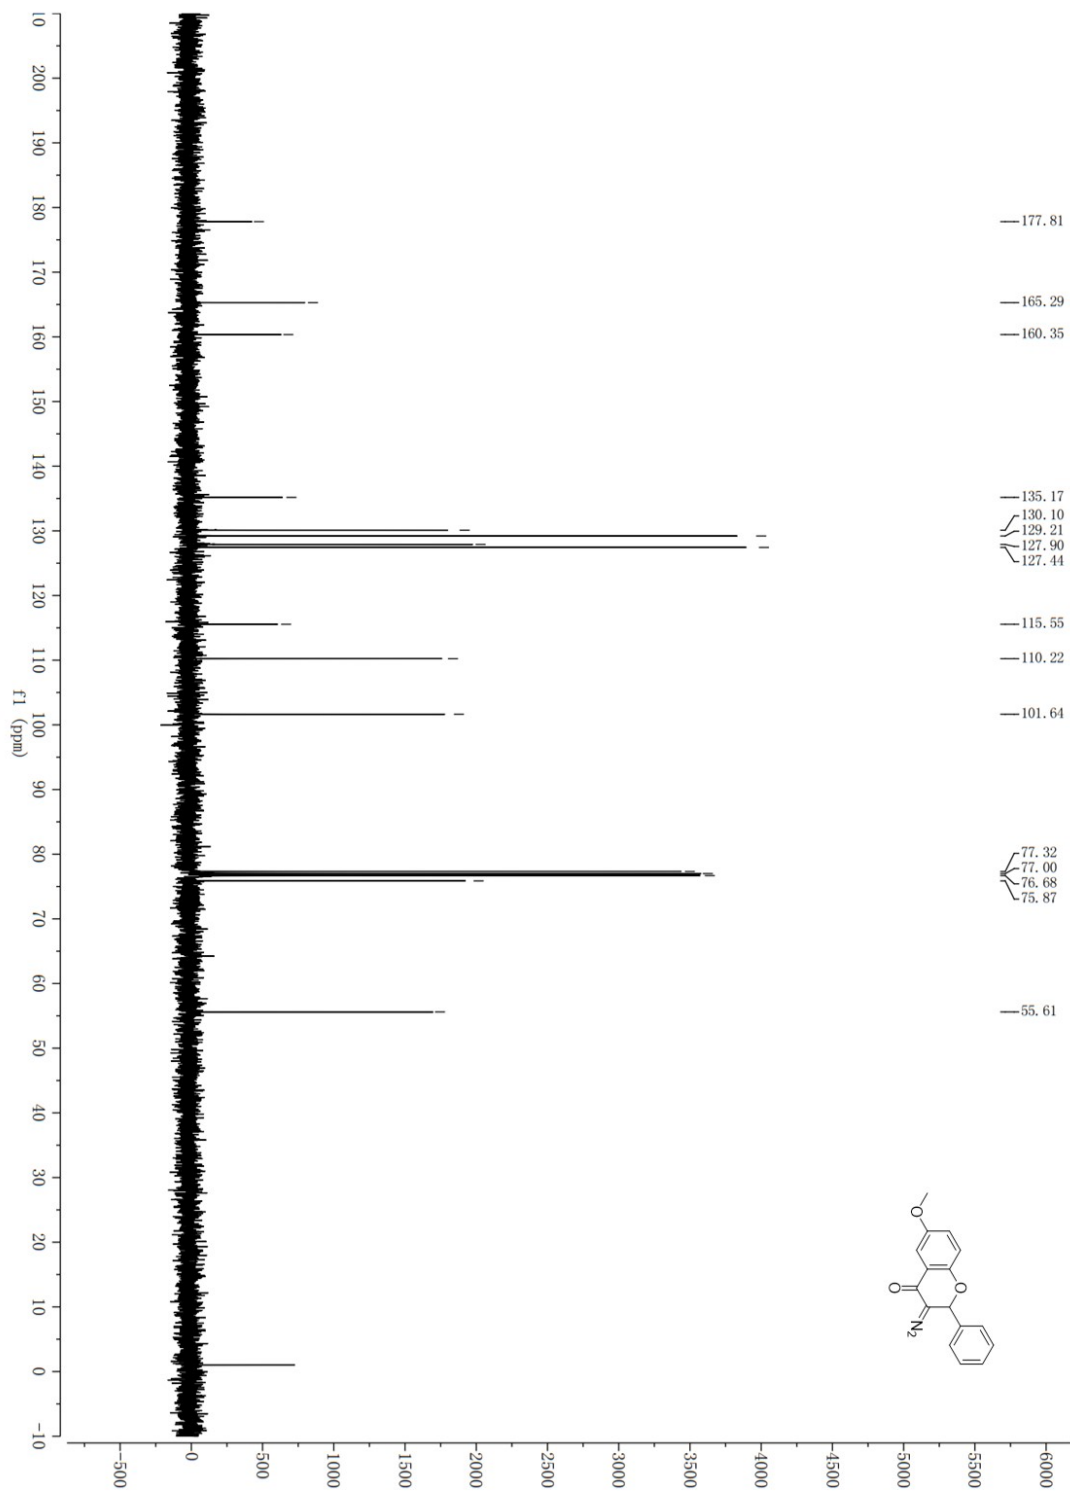

**(11)**  
**<sup>1</sup>H NMR**

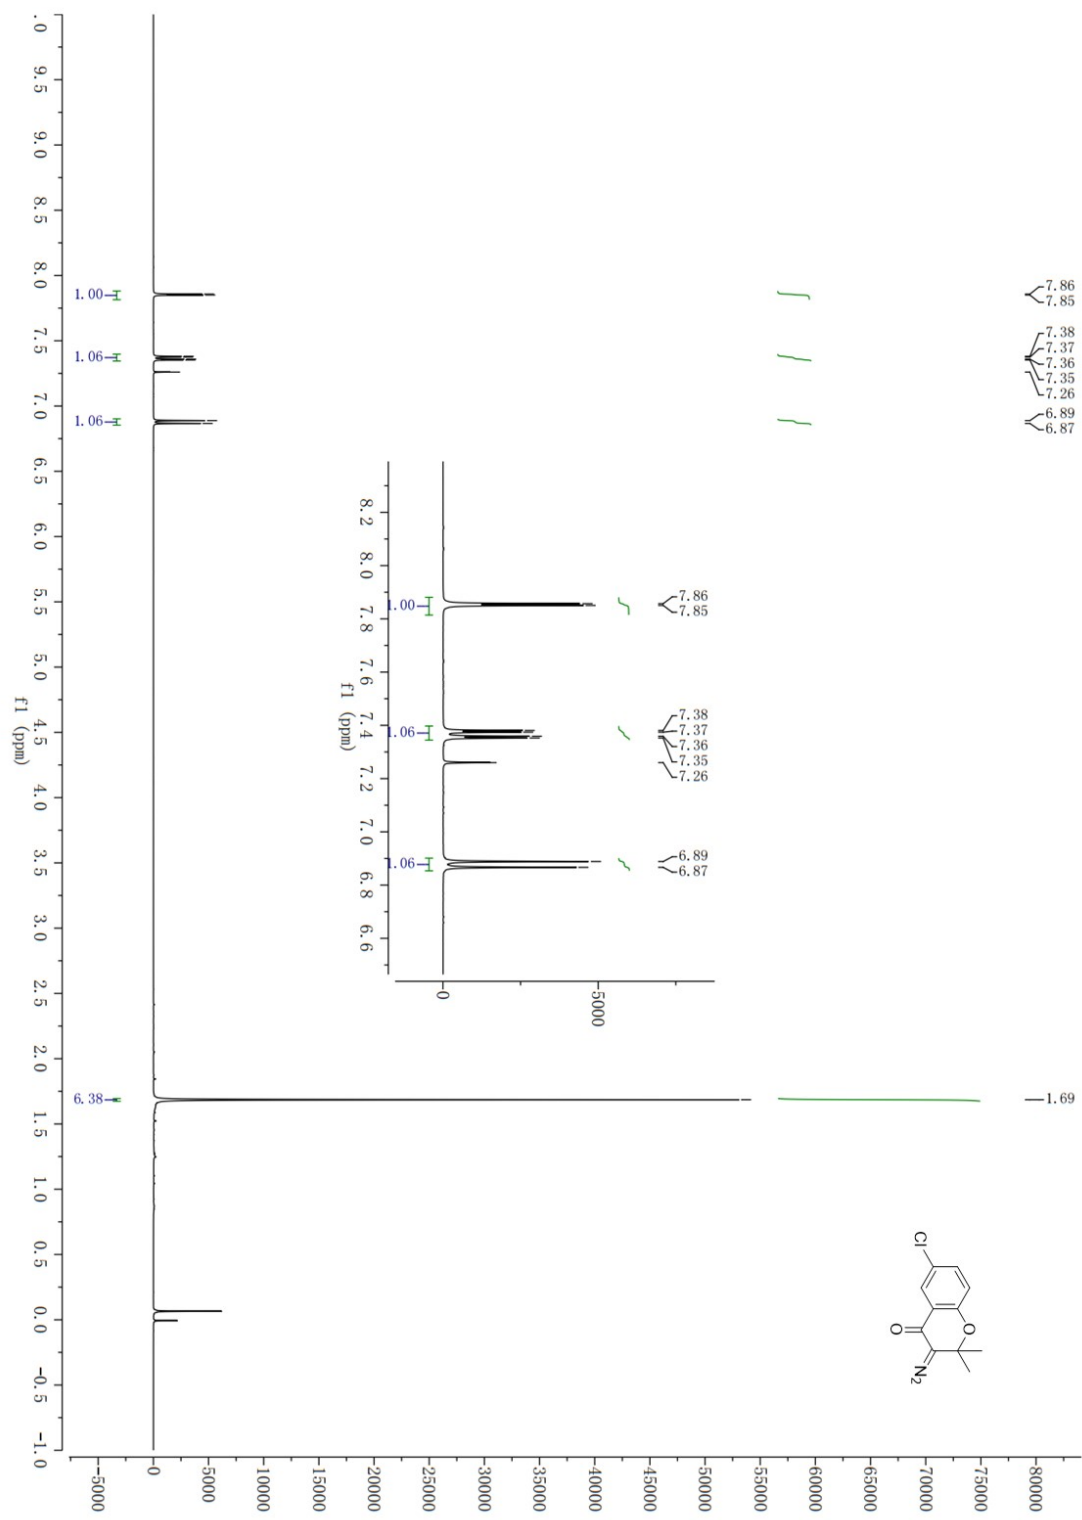

<sup>13</sup>C NMR

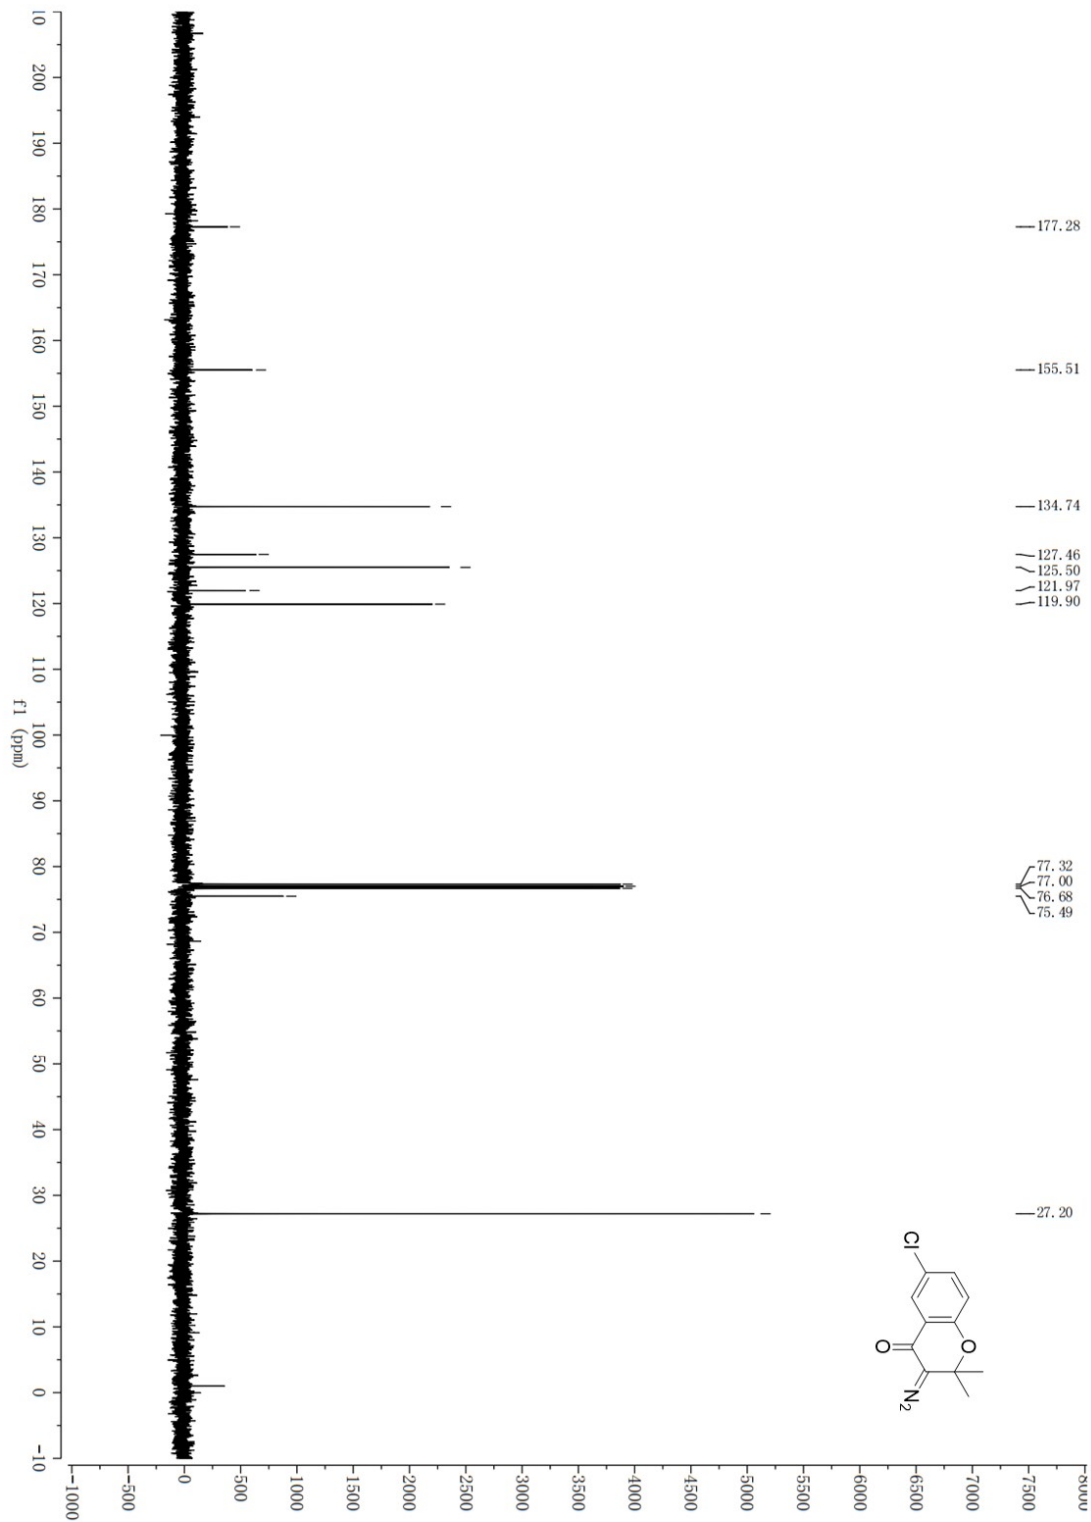

**(1m)**  
<sup>1</sup>H NMR

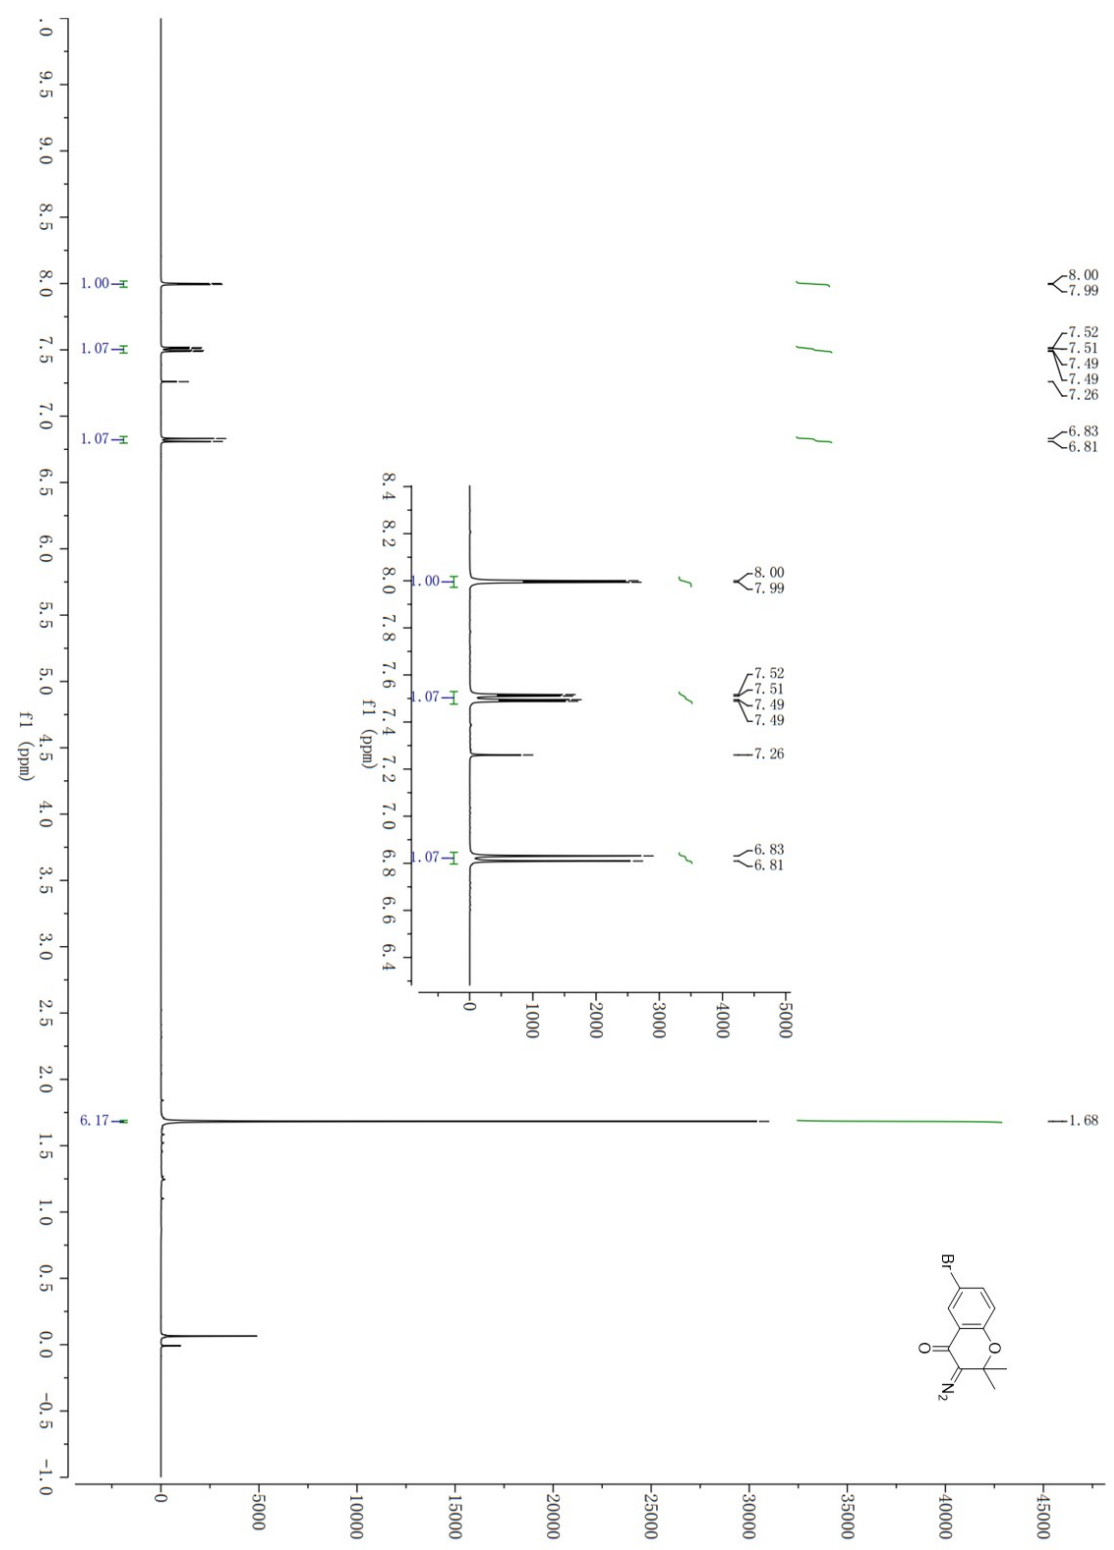

<sup>13</sup>C NMR

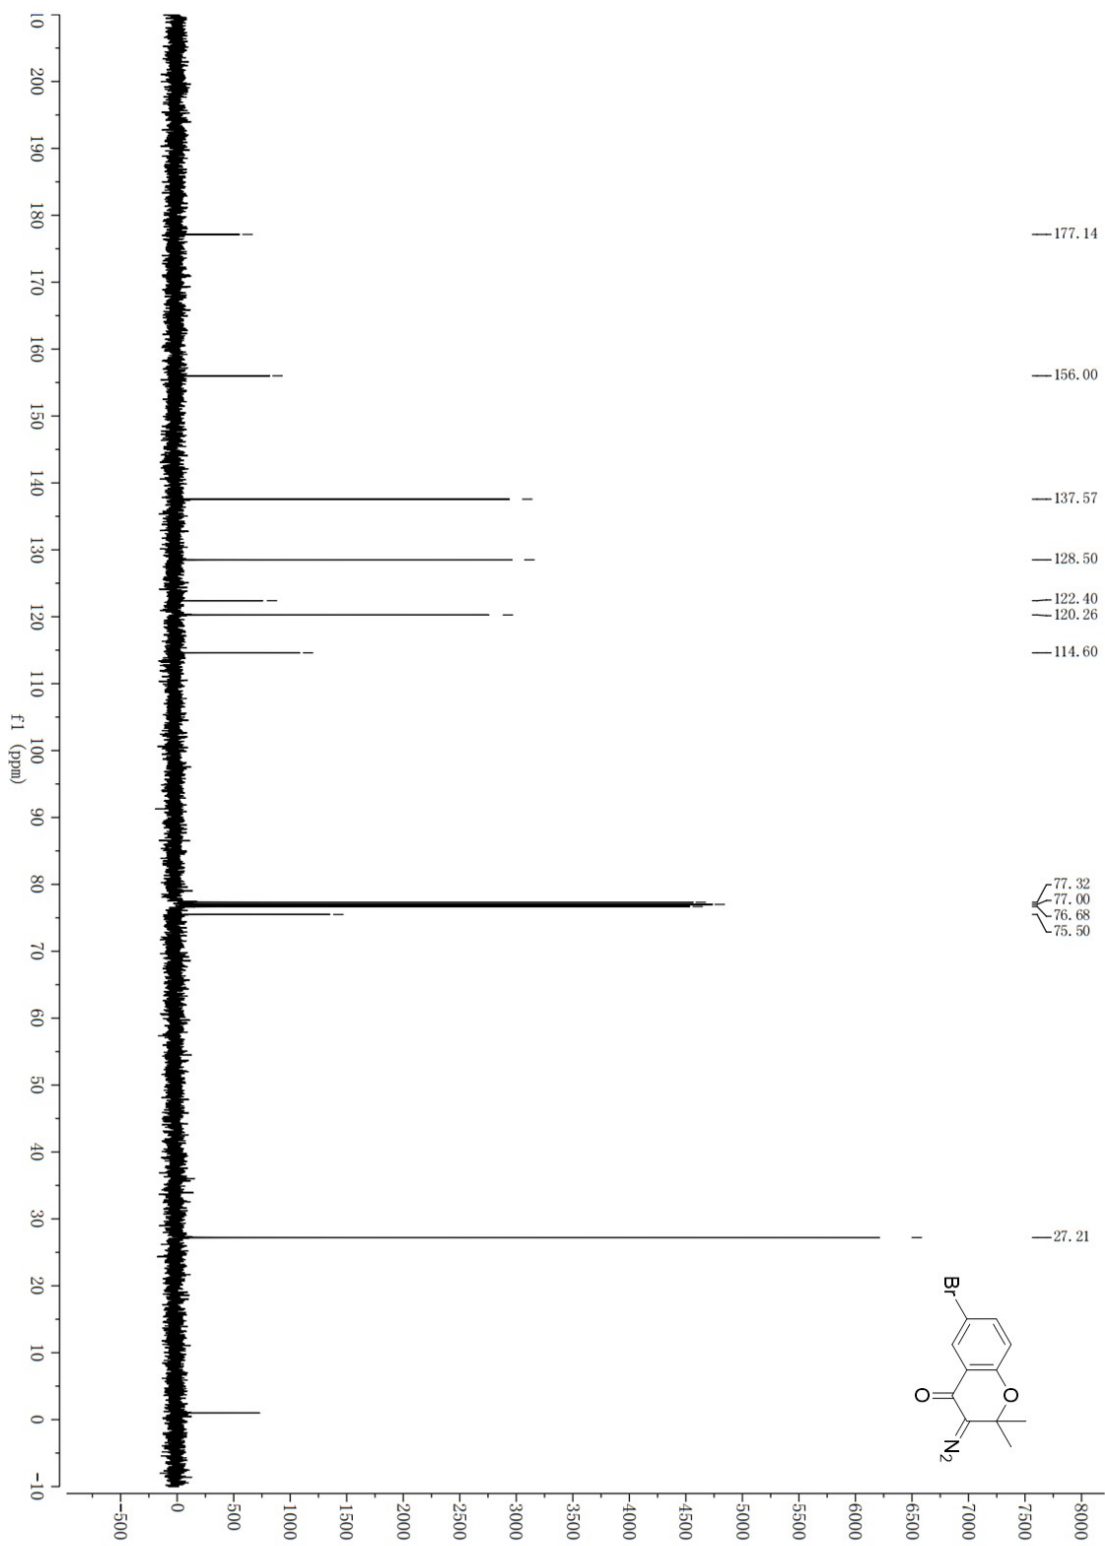

**(1n)**  
<sup>1</sup>H NMR

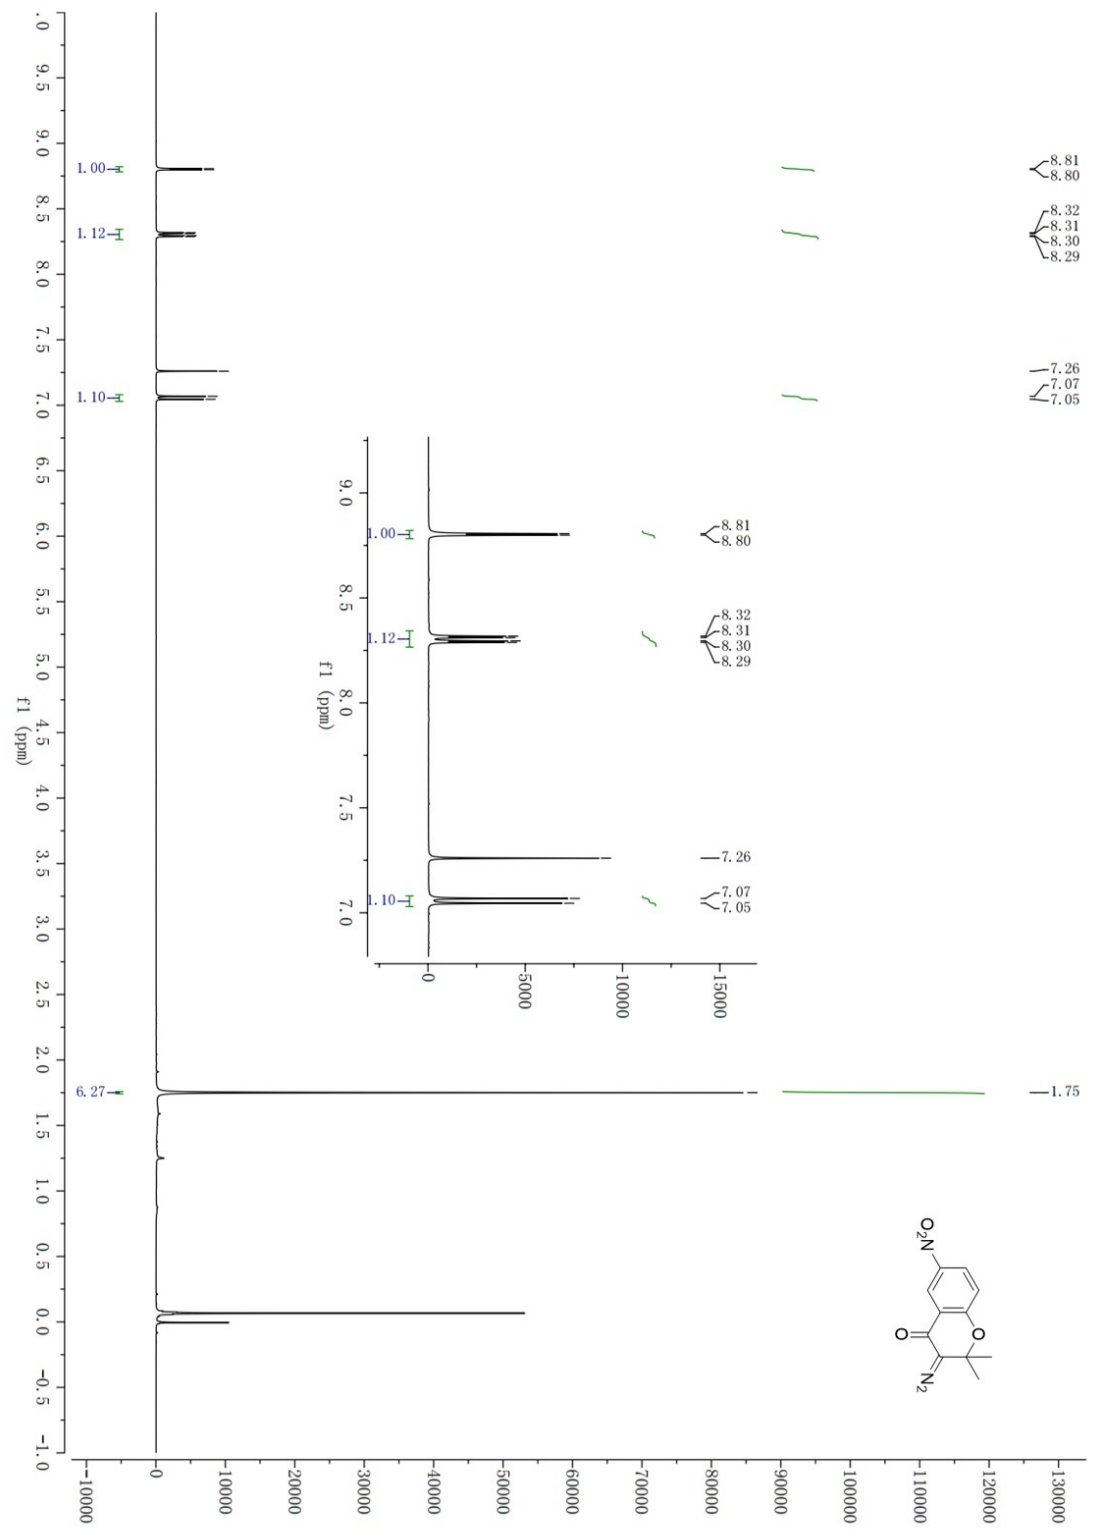



<sup>13</sup>C NMR

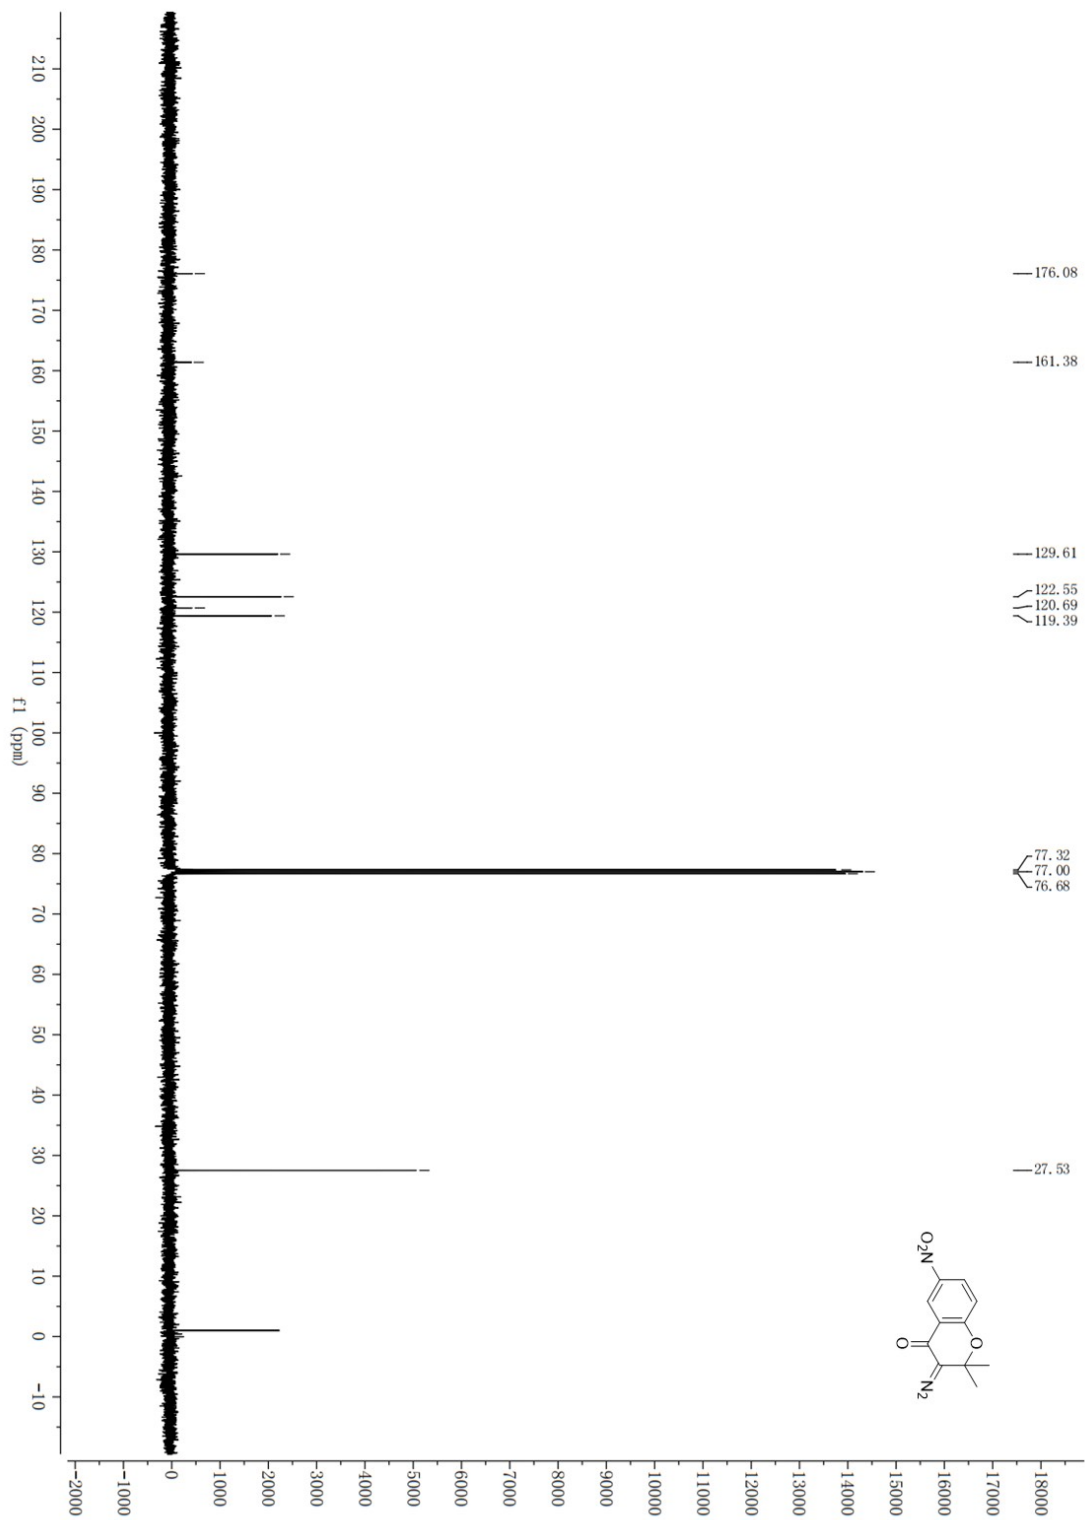

**(10)**  
<sup>1</sup>H NMR

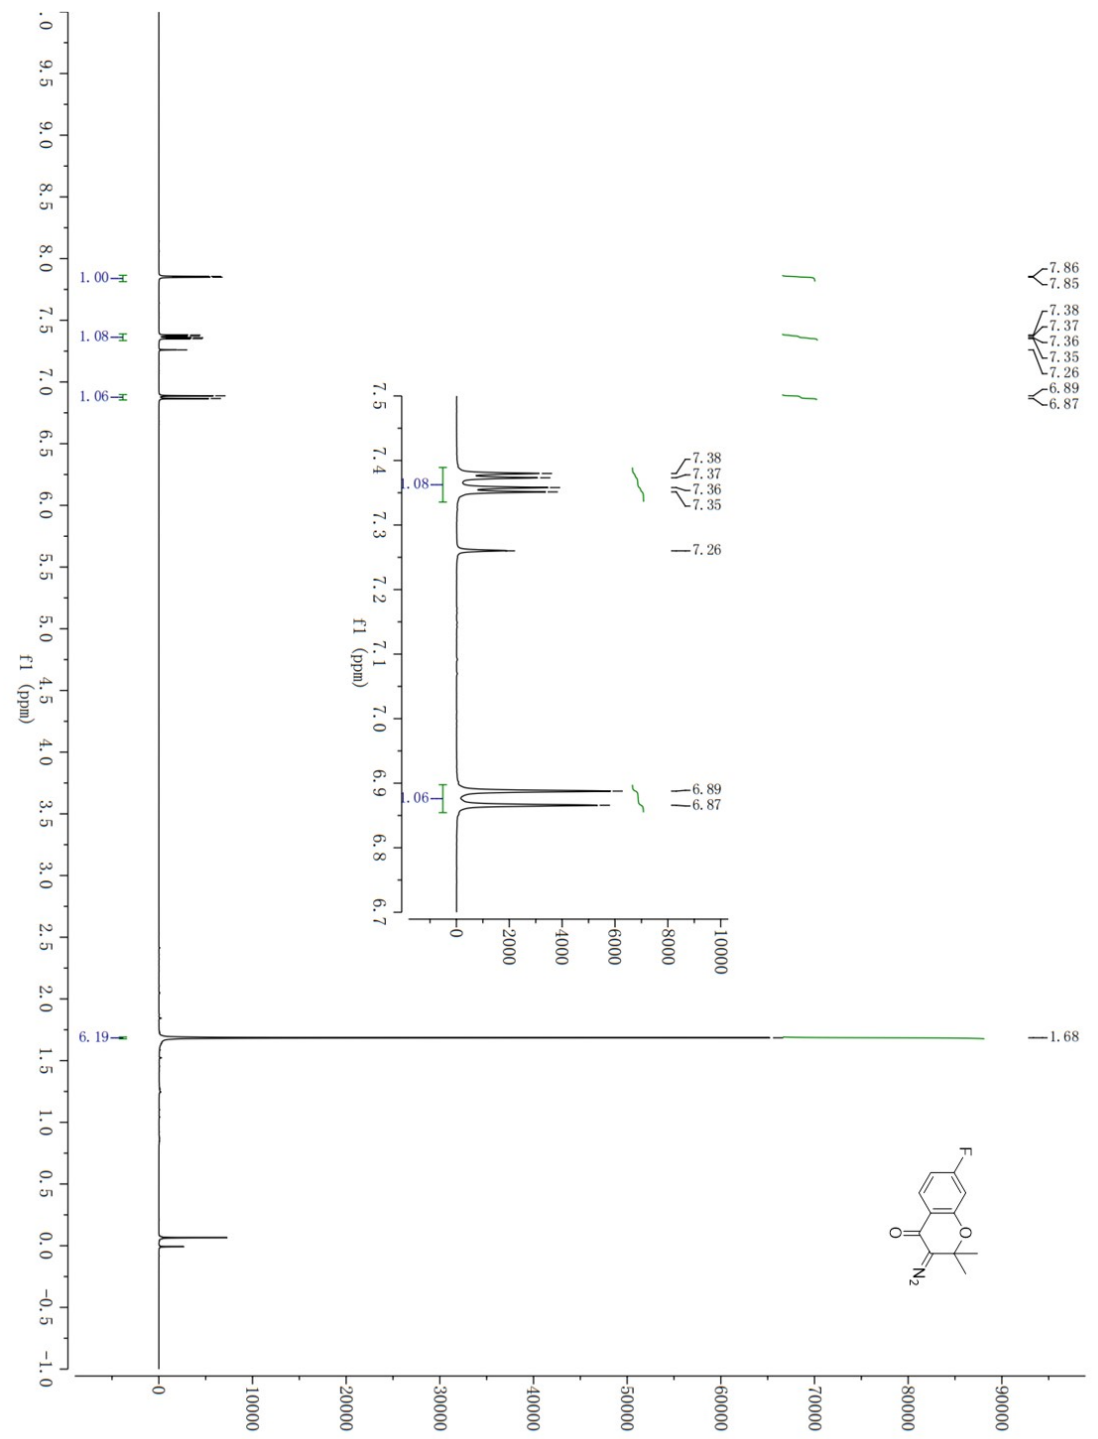

<sup>13</sup>C NMR

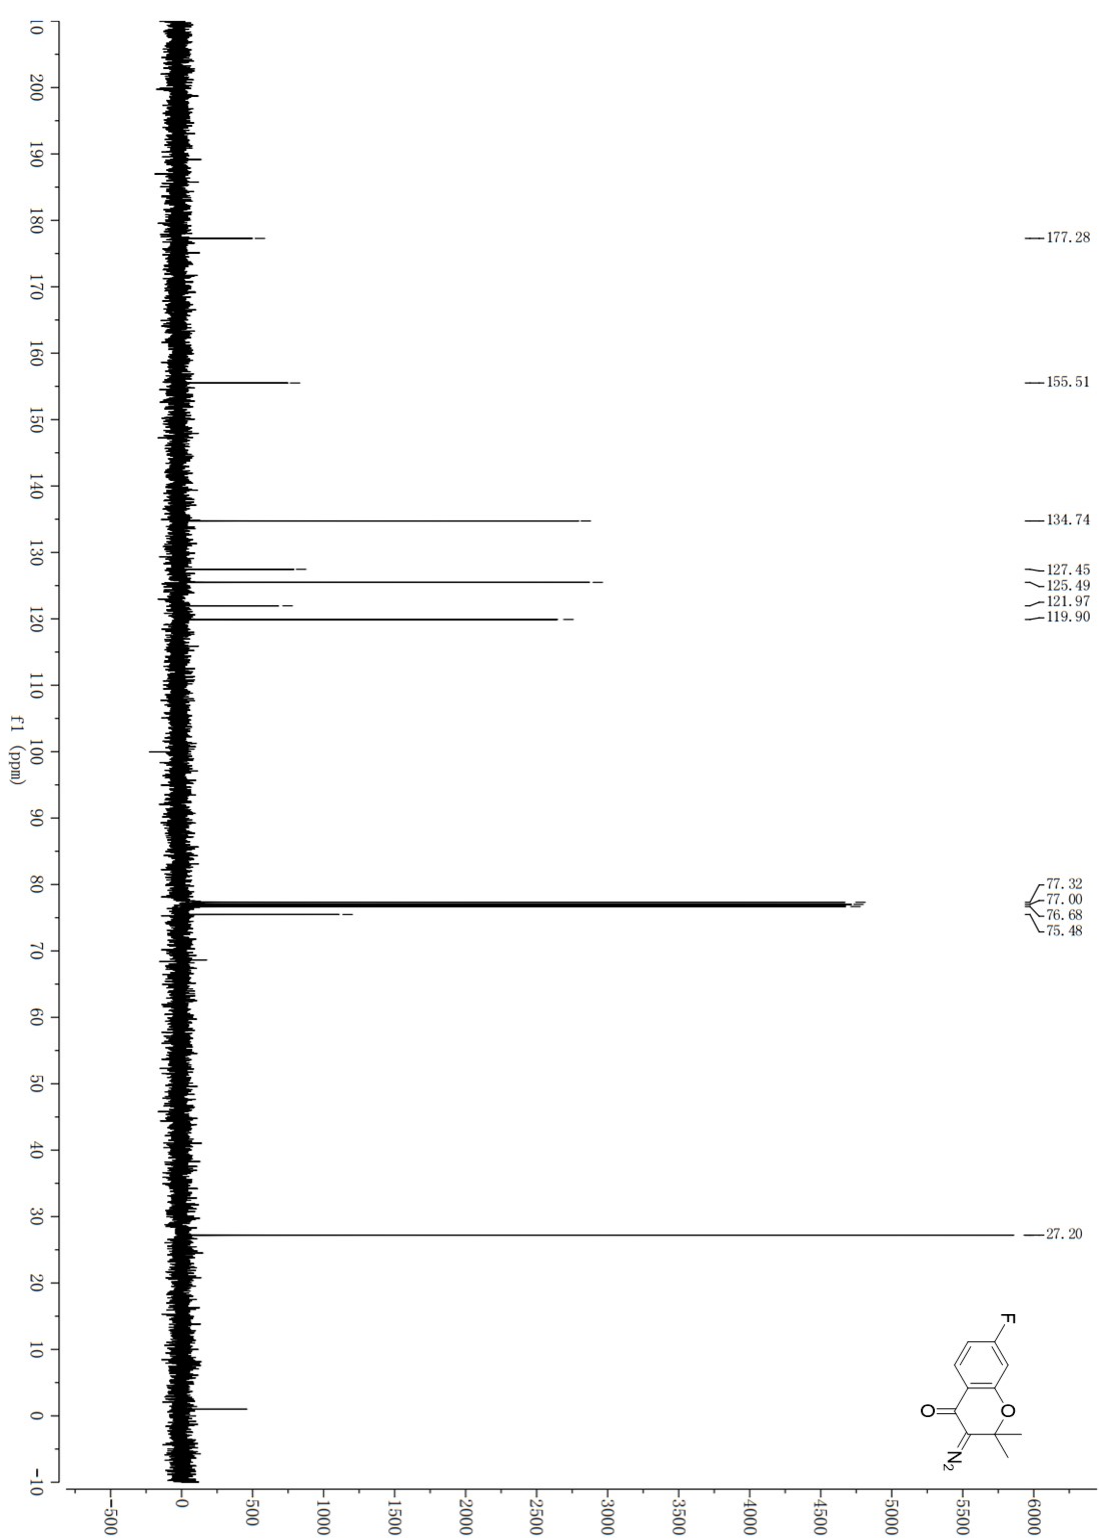

**(1p)**  
<sup>1</sup>H NMR

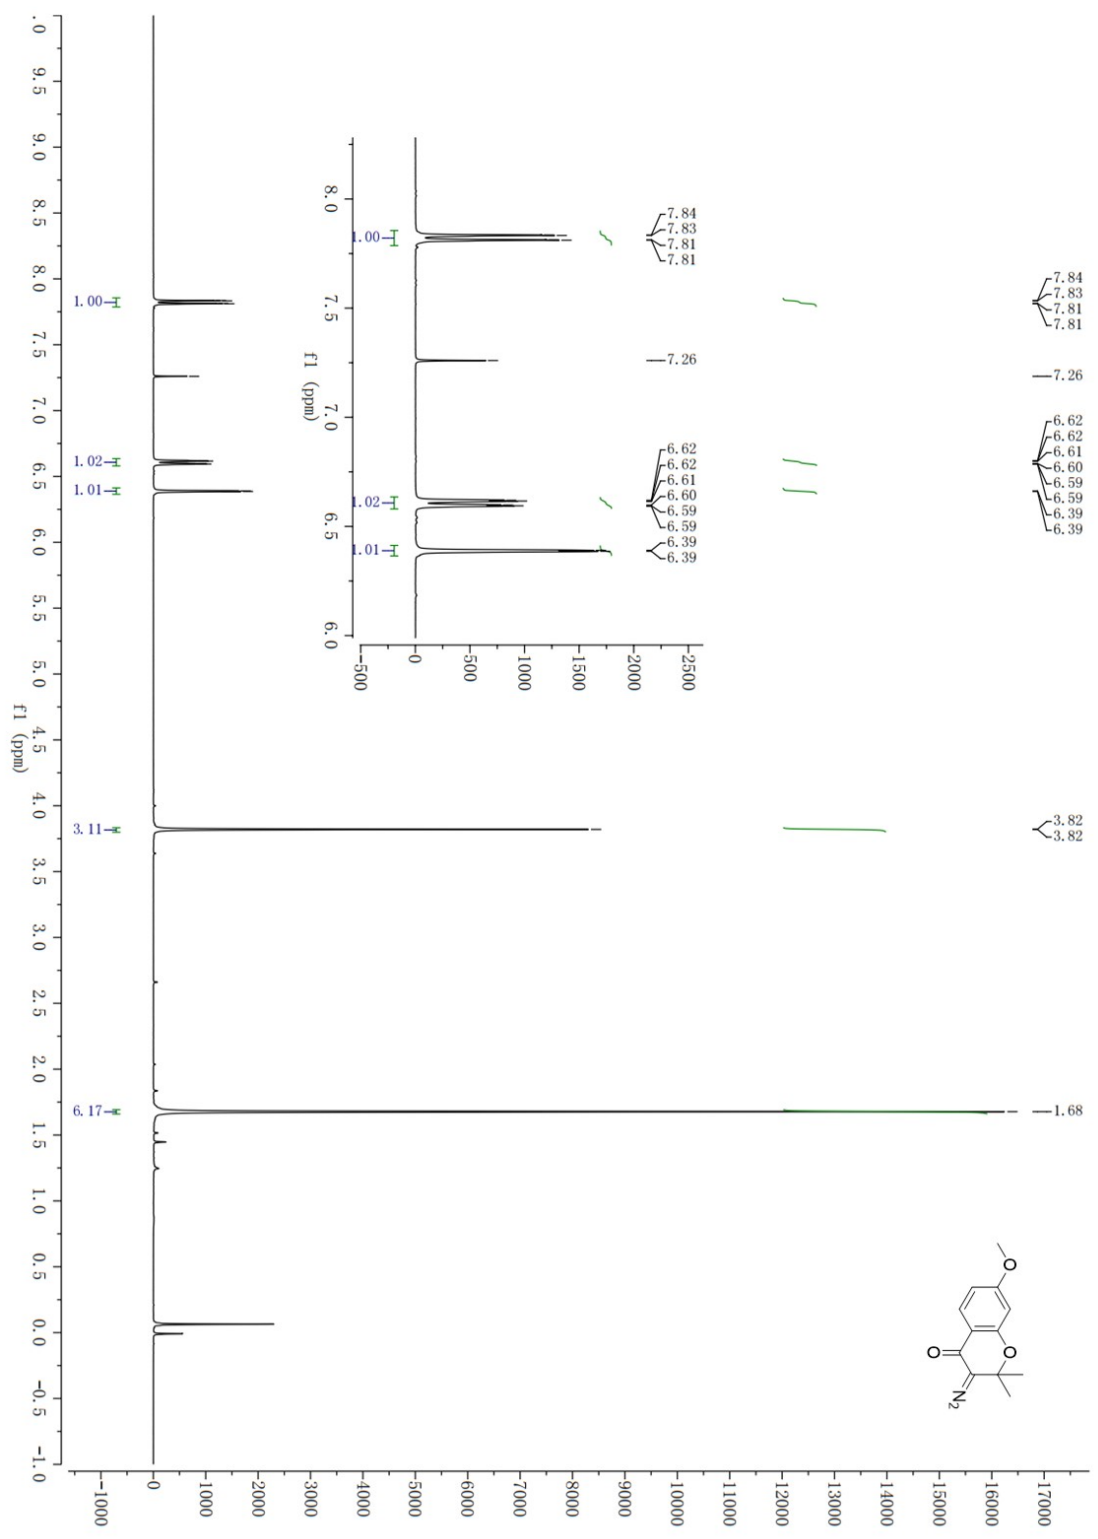

<sup>13</sup>C NMR

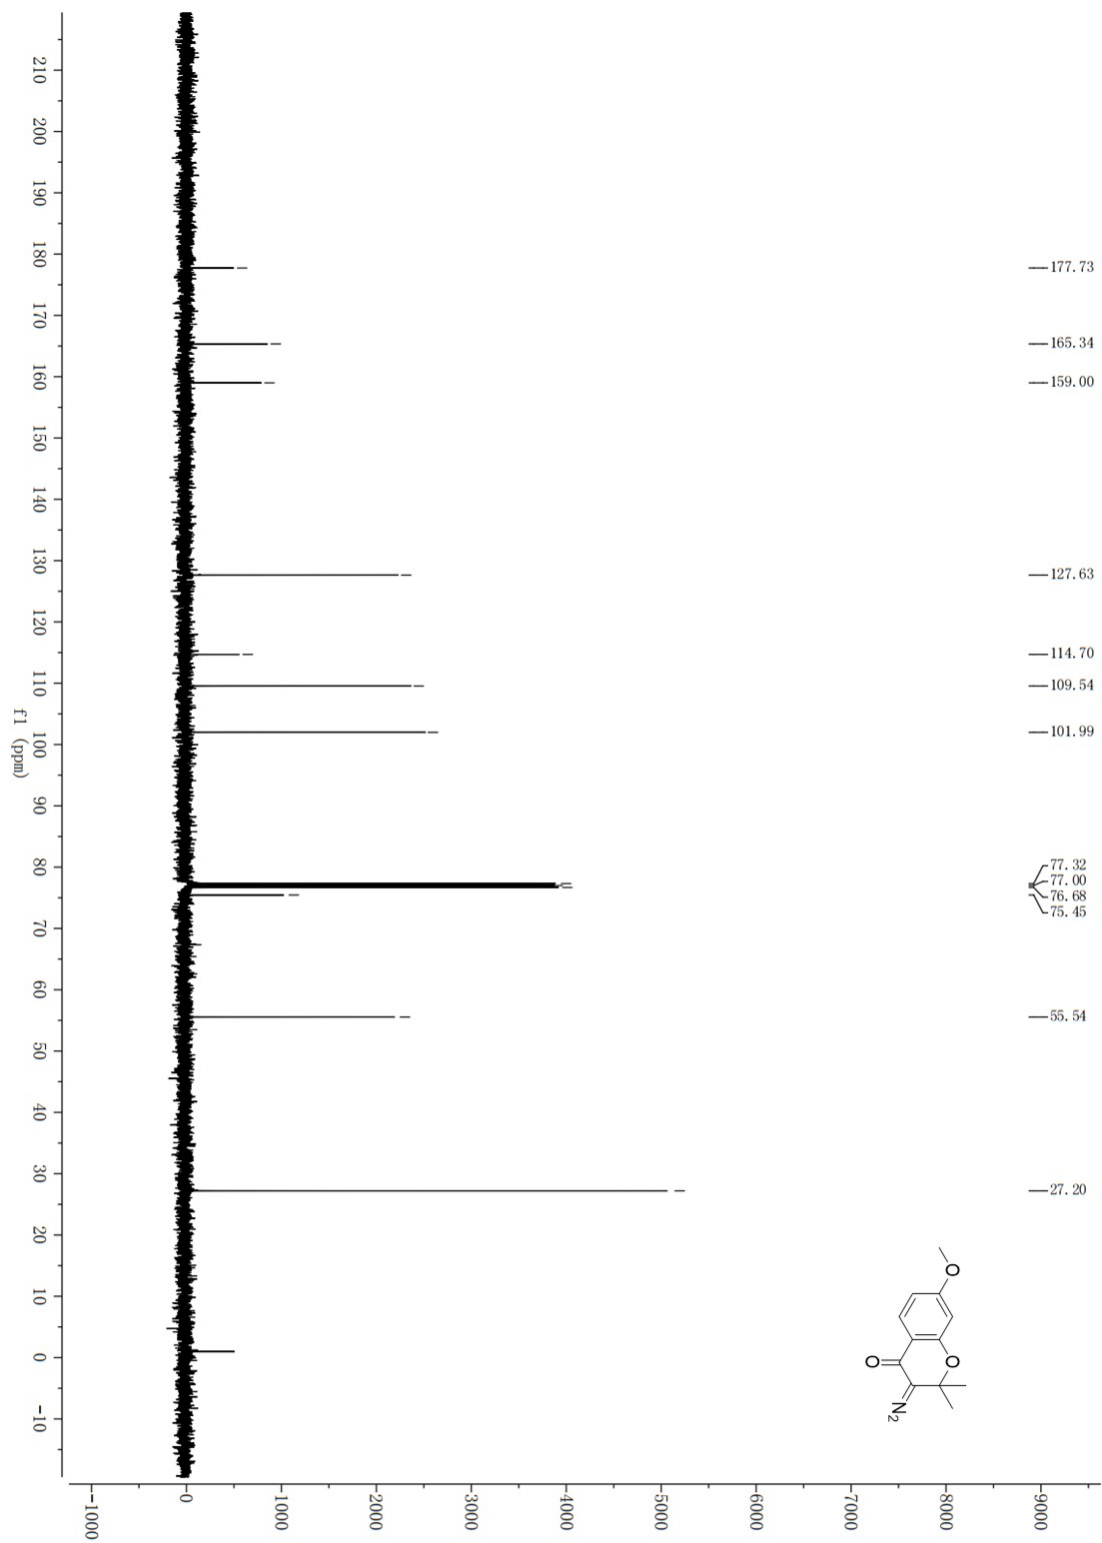

**(2a)**  
<sup>1</sup>H NMR

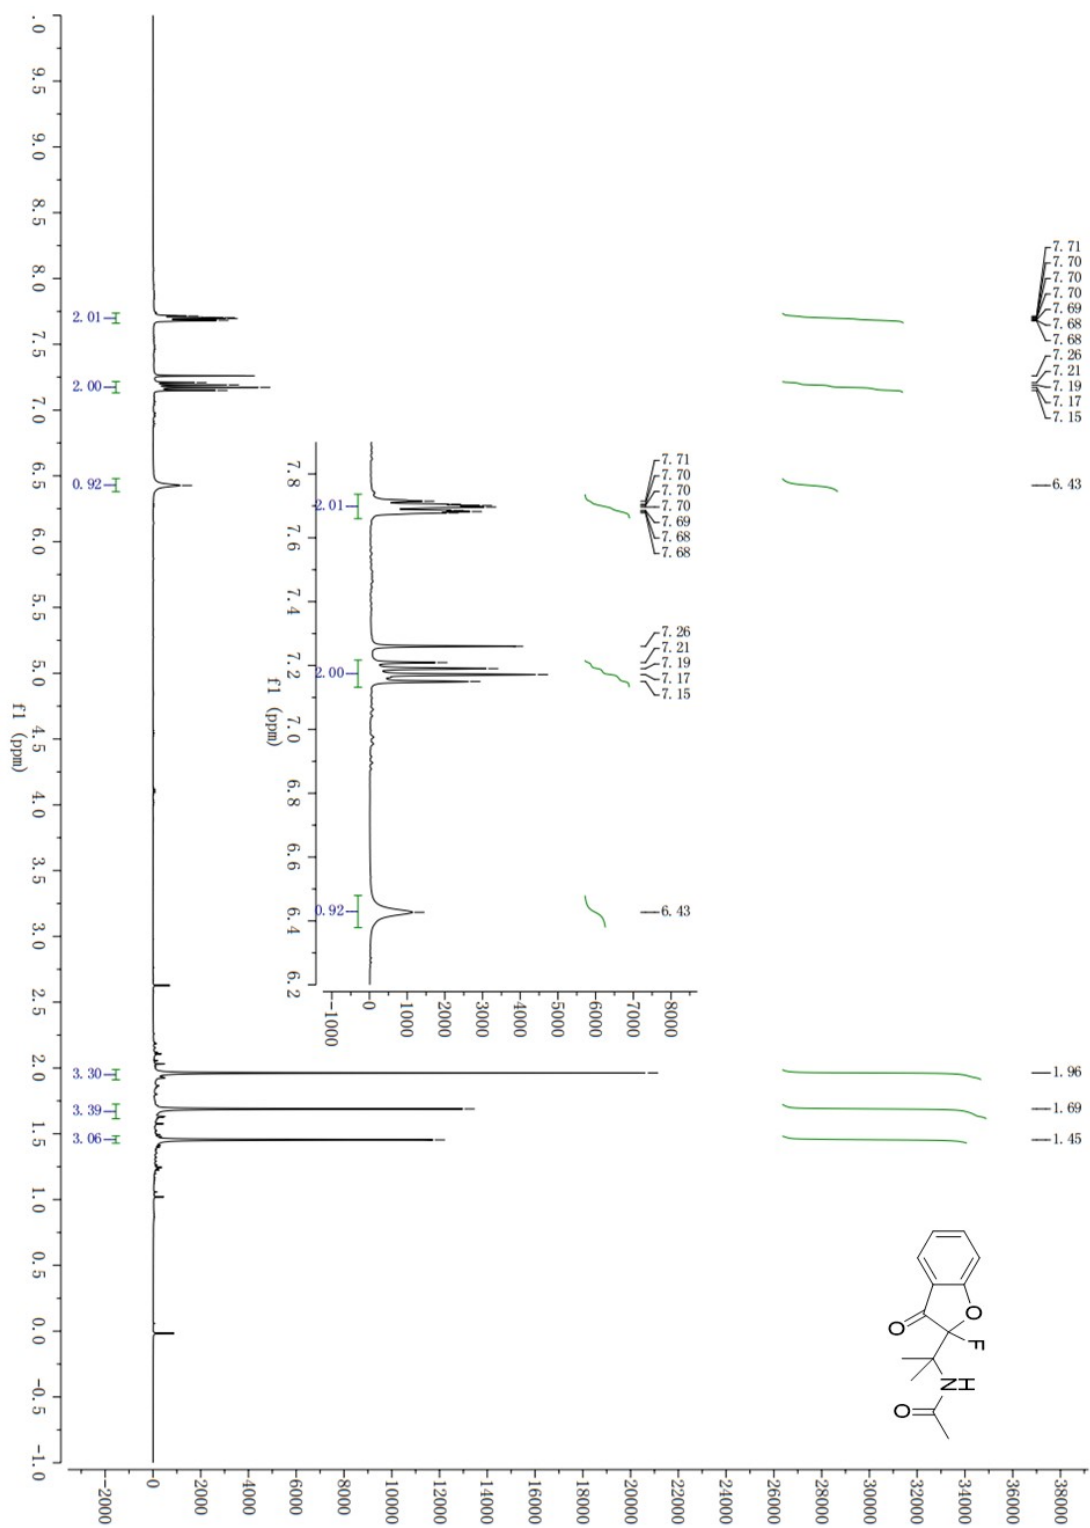

$^{19}\text{F}$  NMR

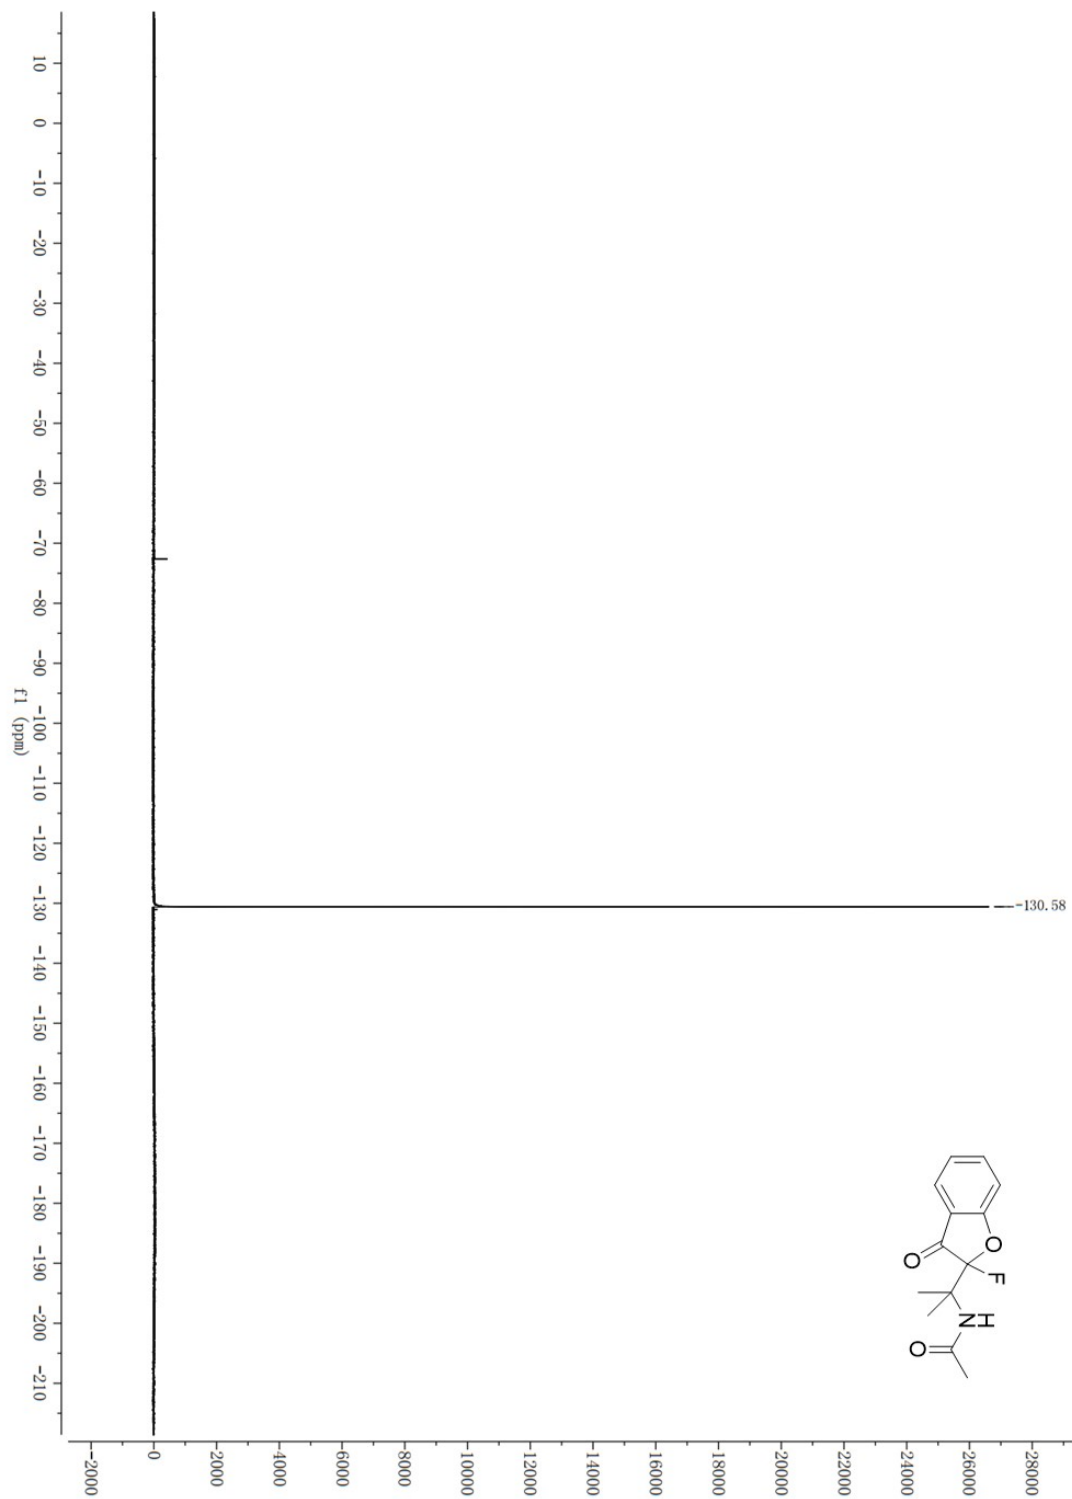

<sup>13</sup>C NMR

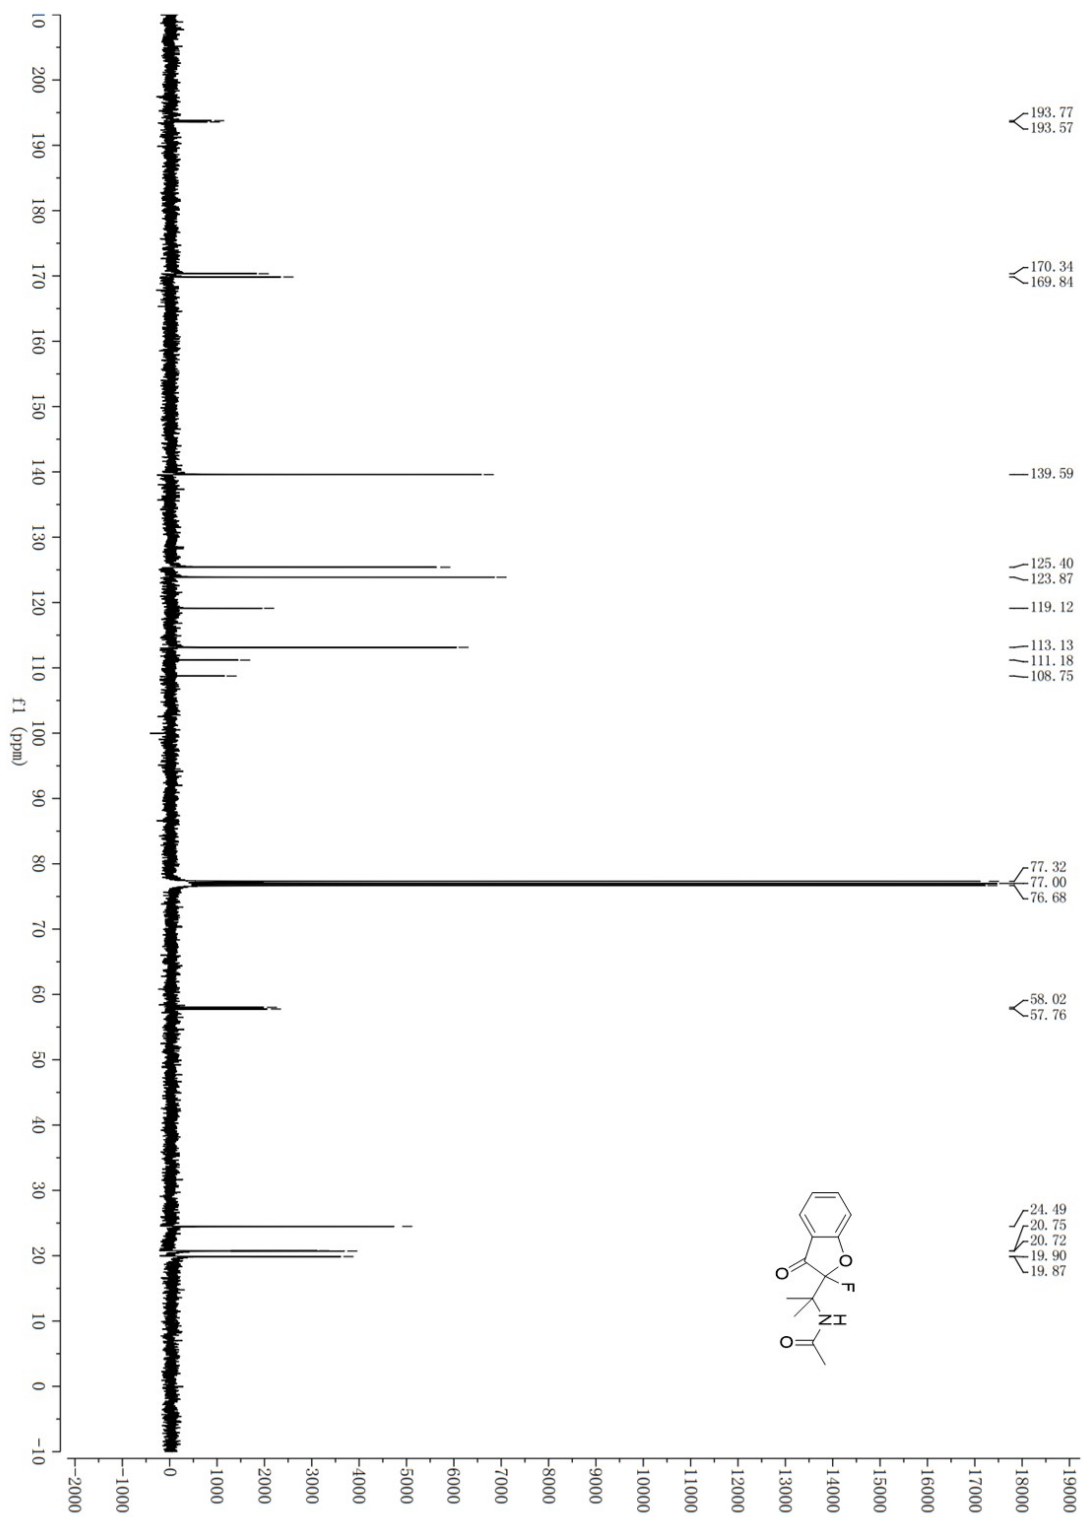



**(2b)**  
<sup>1</sup>H NMR

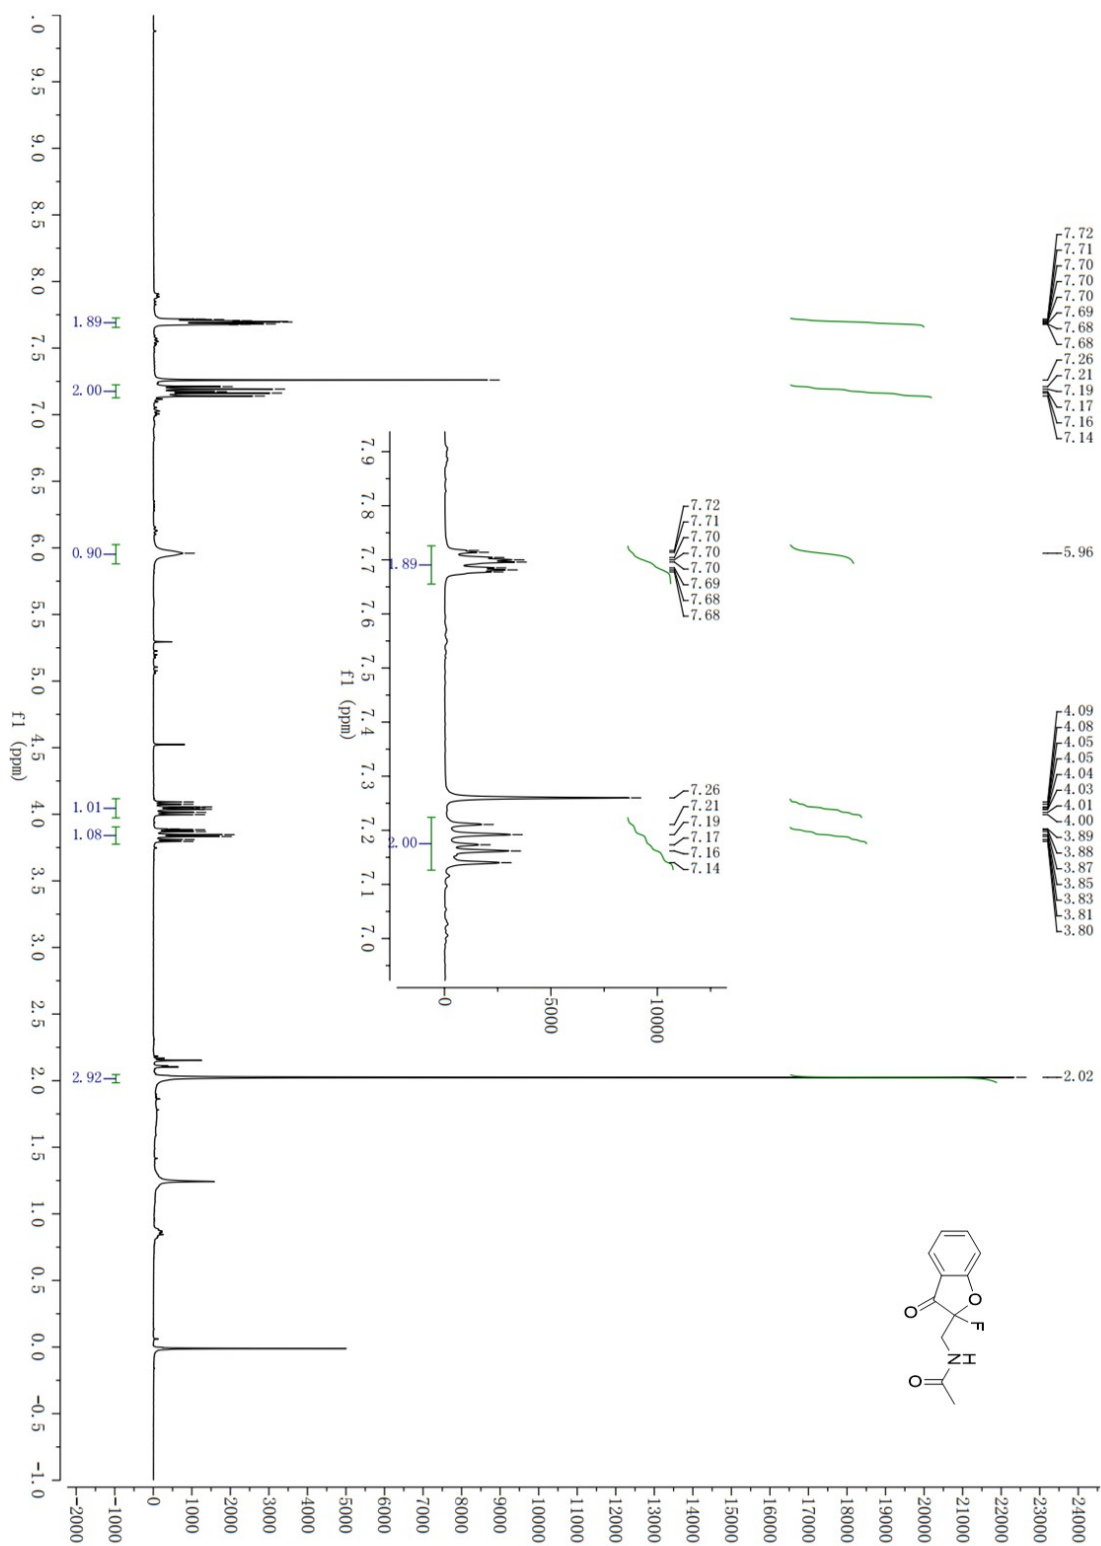

<sup>19</sup>F NMR

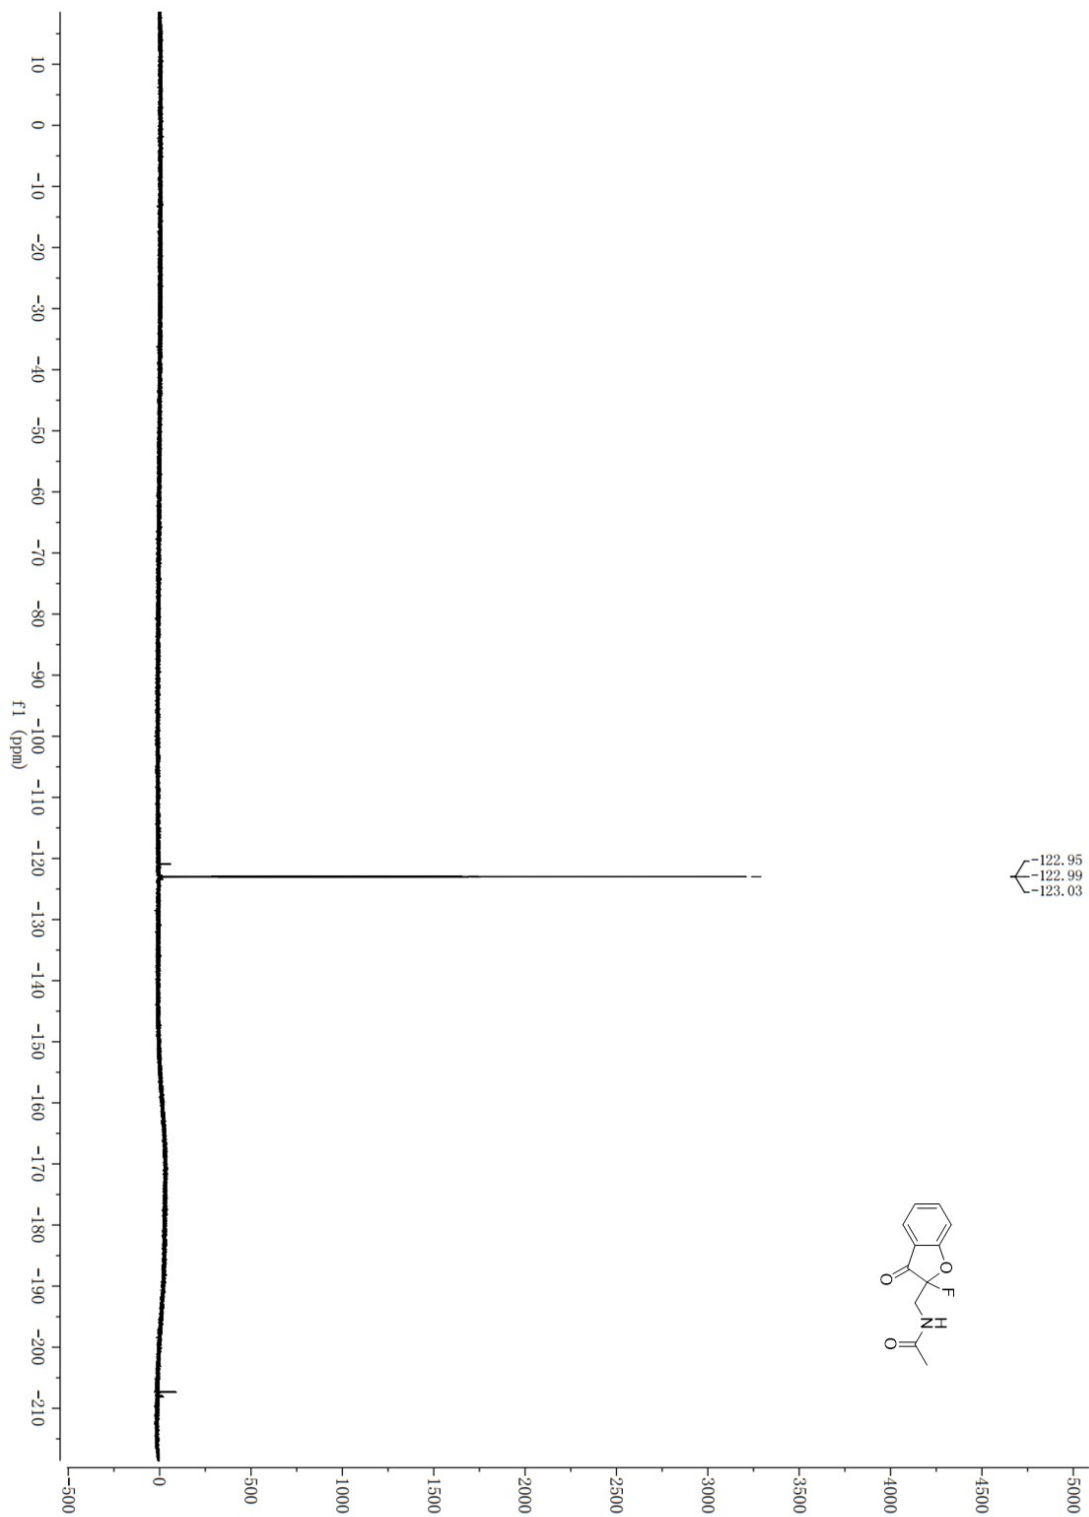

<sup>13</sup>C NMR

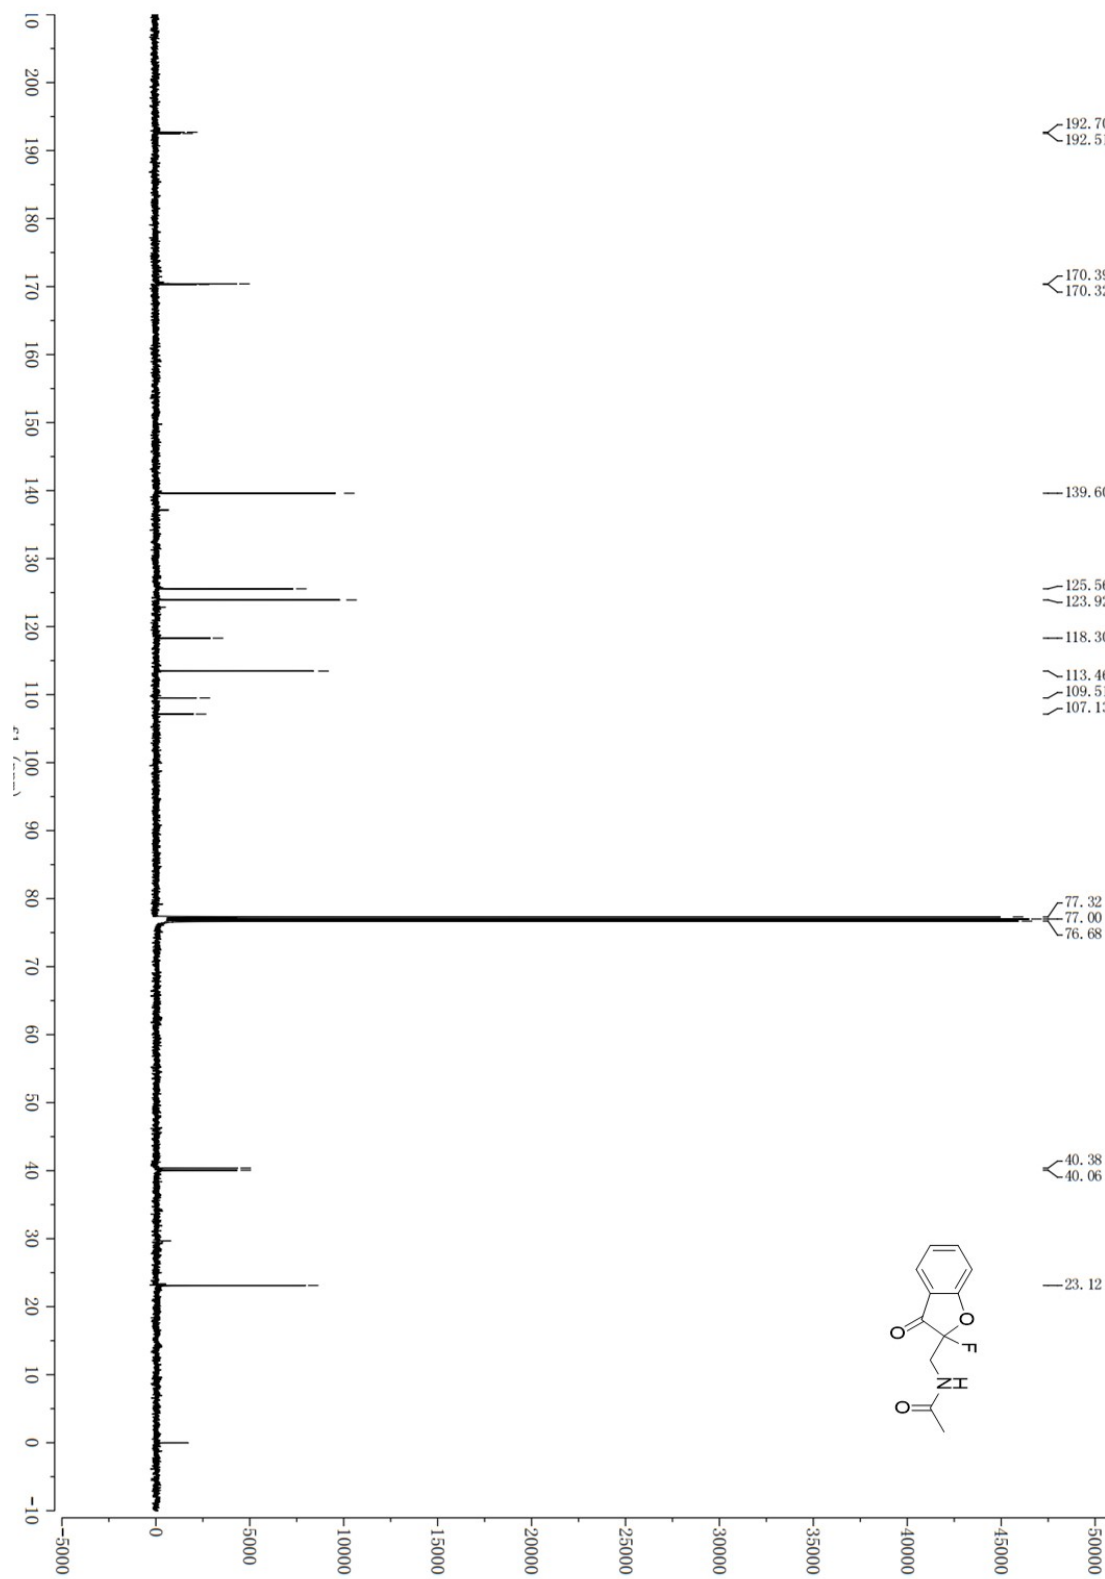

**(2c)**  
<sup>1</sup>H NMR

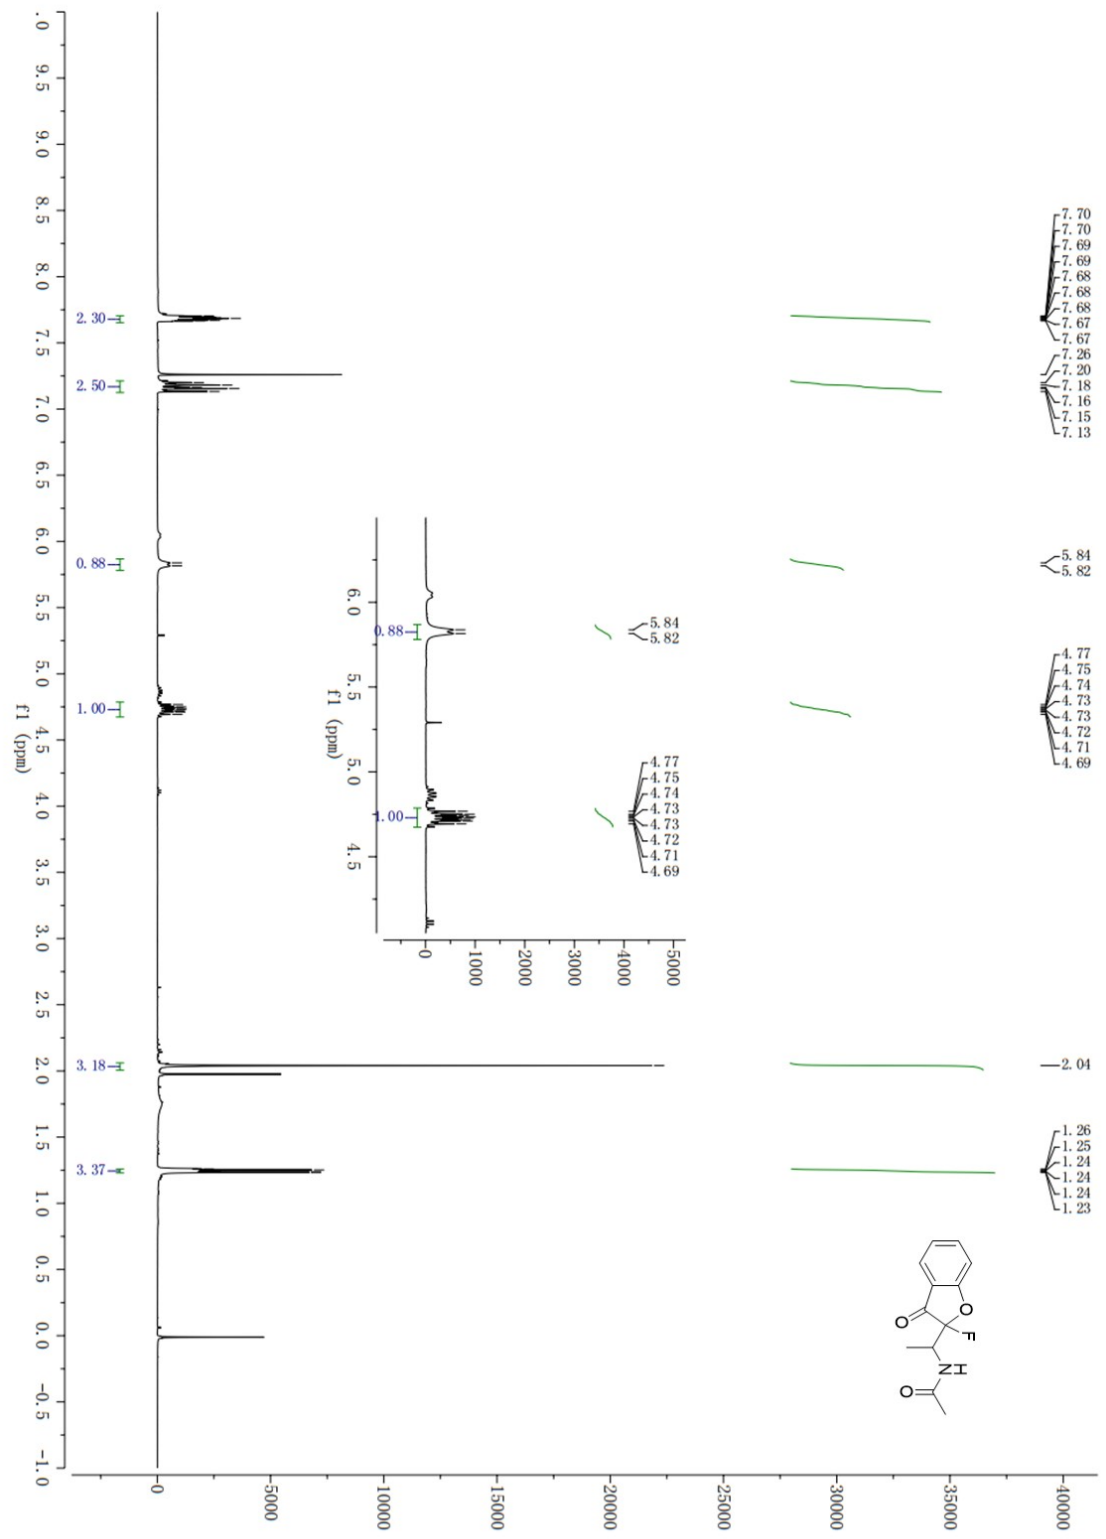

$^{19}\text{F}$  NMR

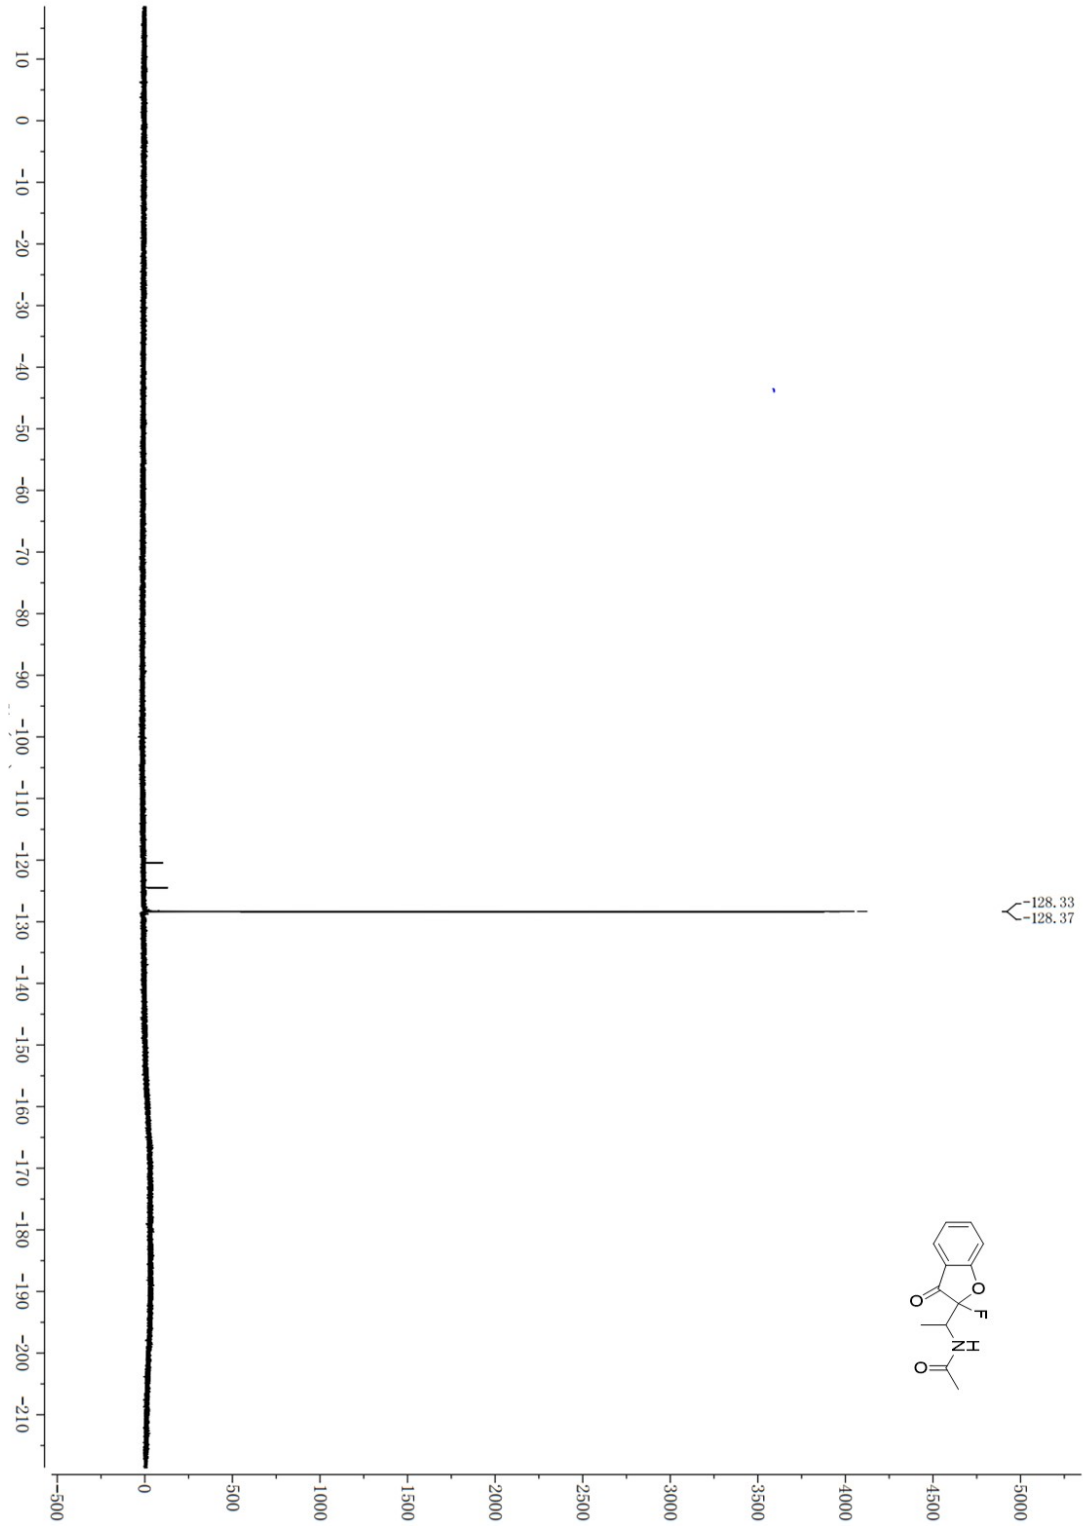

<sup>13</sup>C NMR

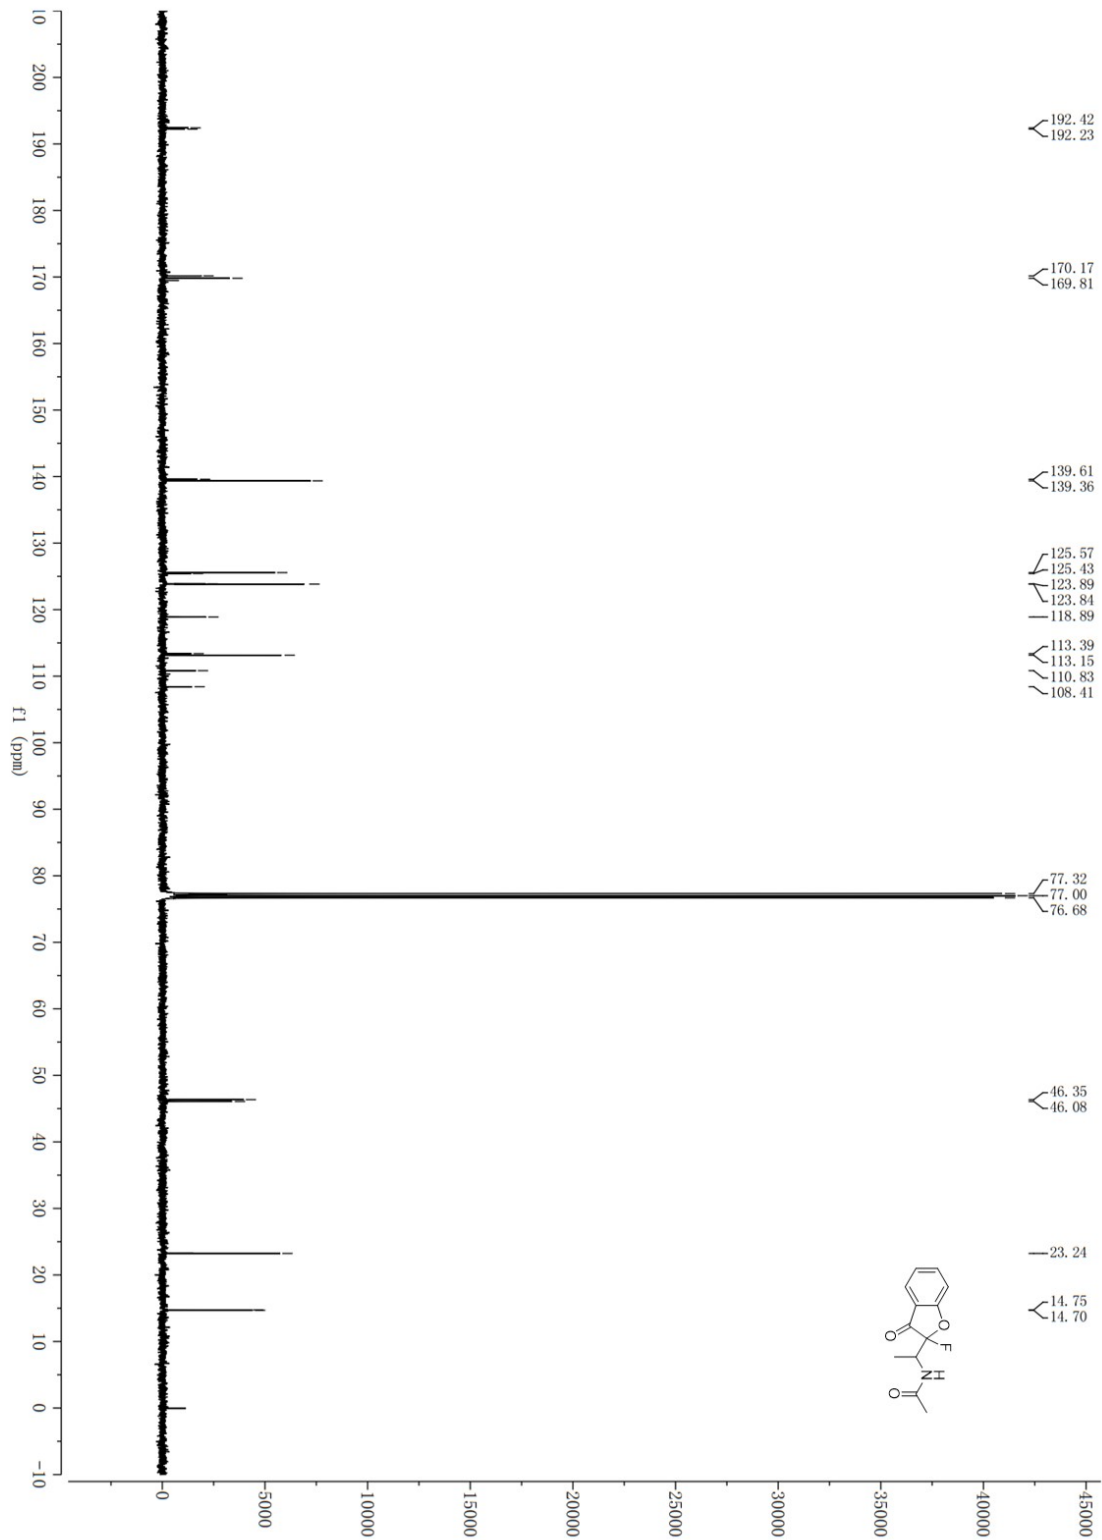

(2d)  
<sup>1</sup>H NMR

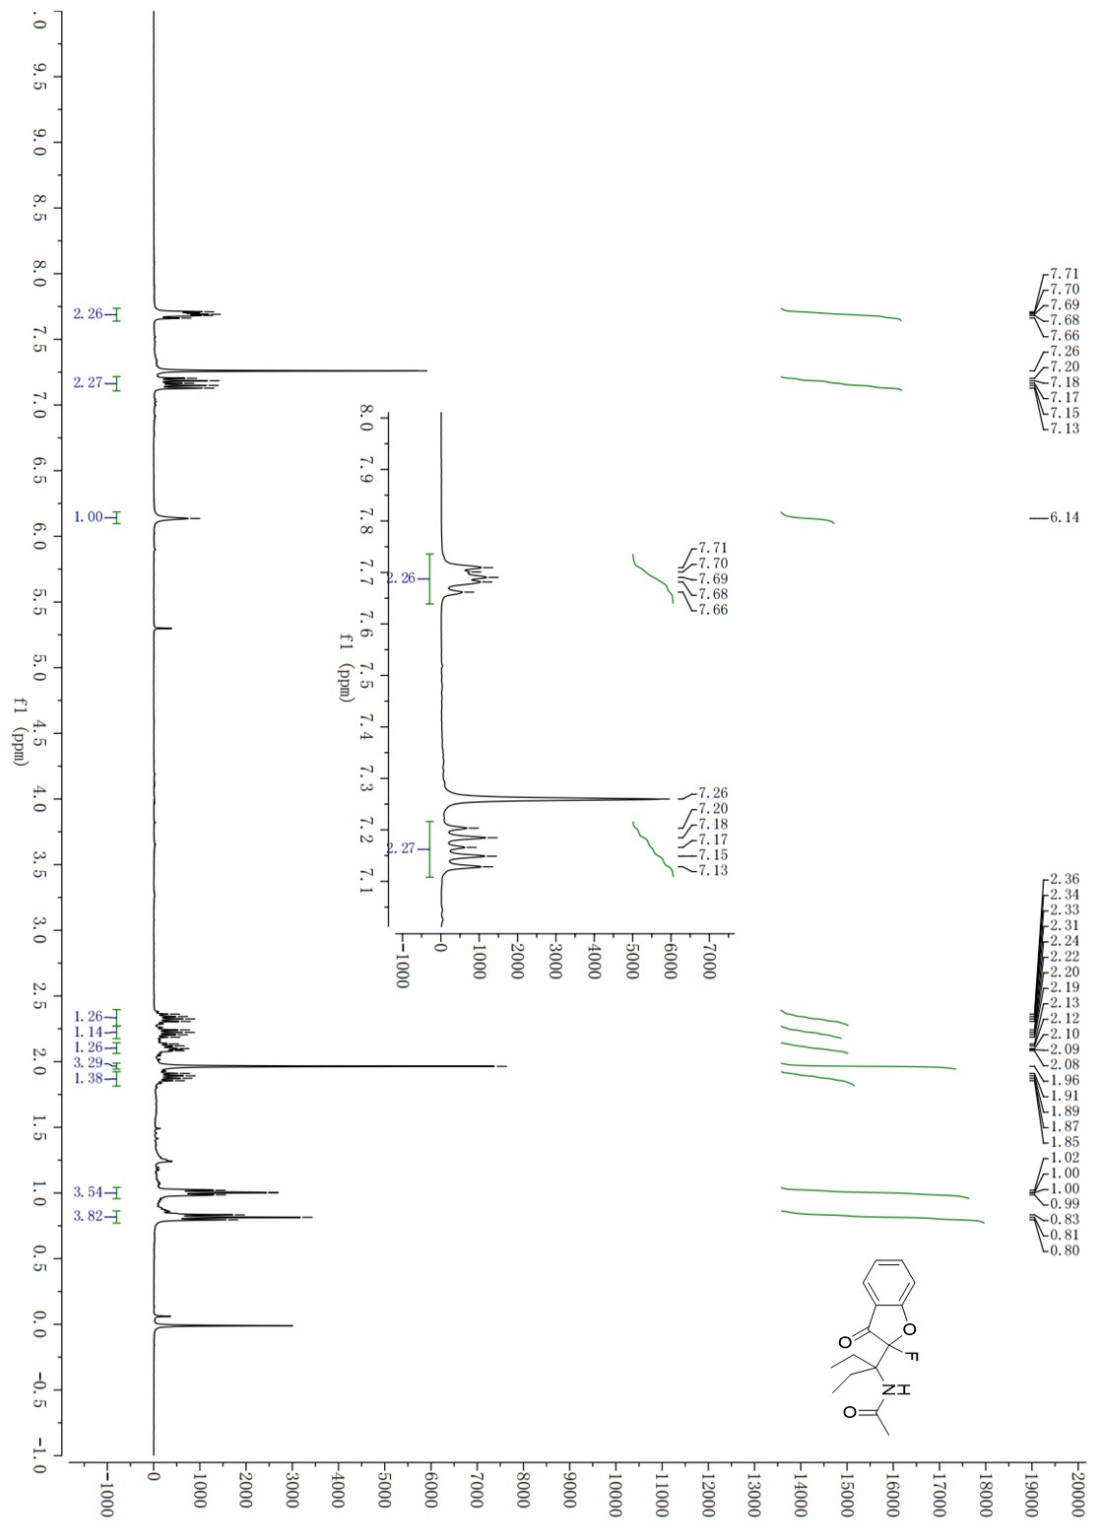

<sup>19</sup>F NMR

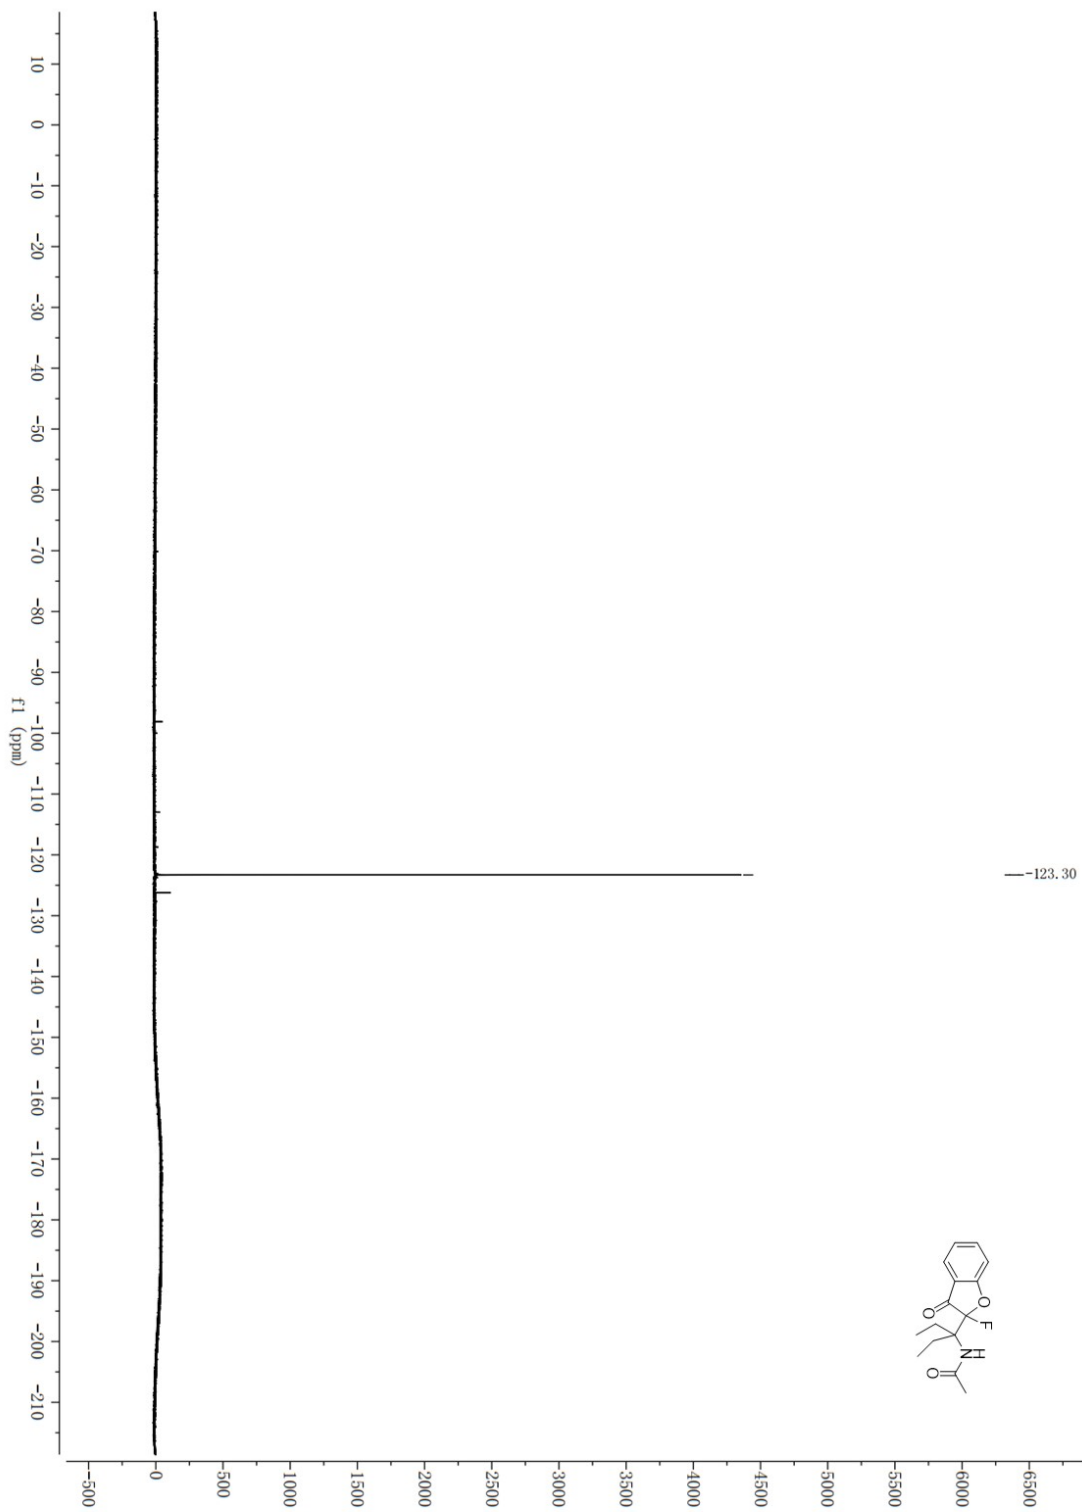



<sup>13</sup>C NMR

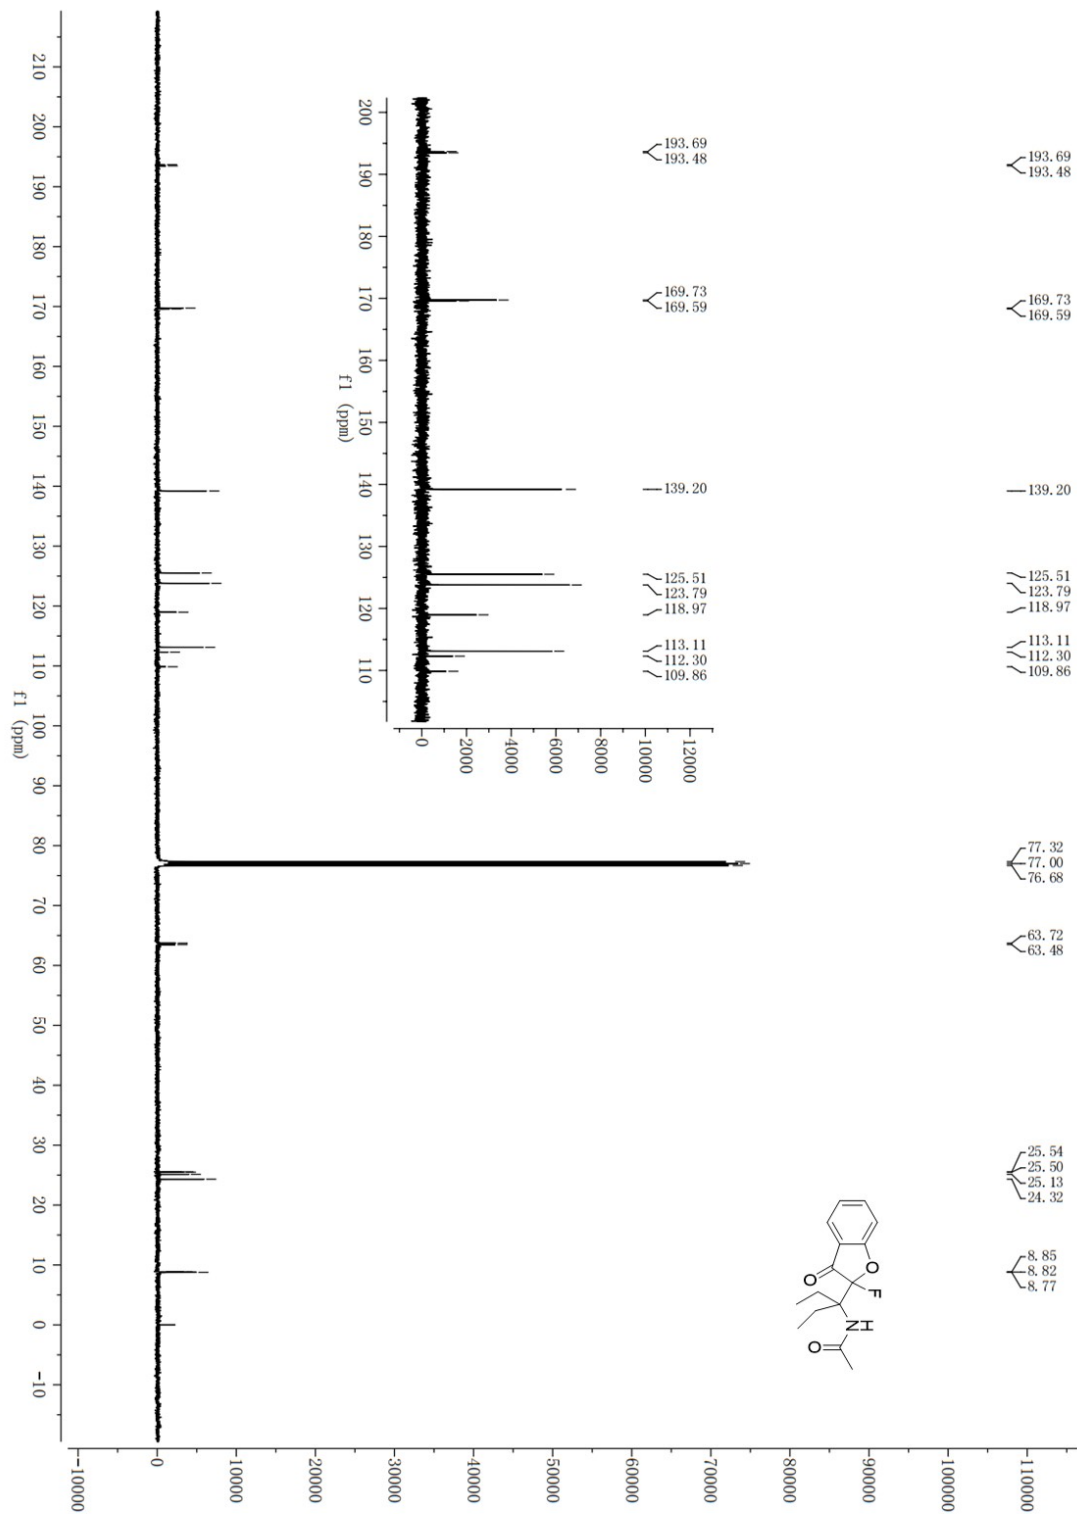

(2e)  
<sup>1</sup>H NMR

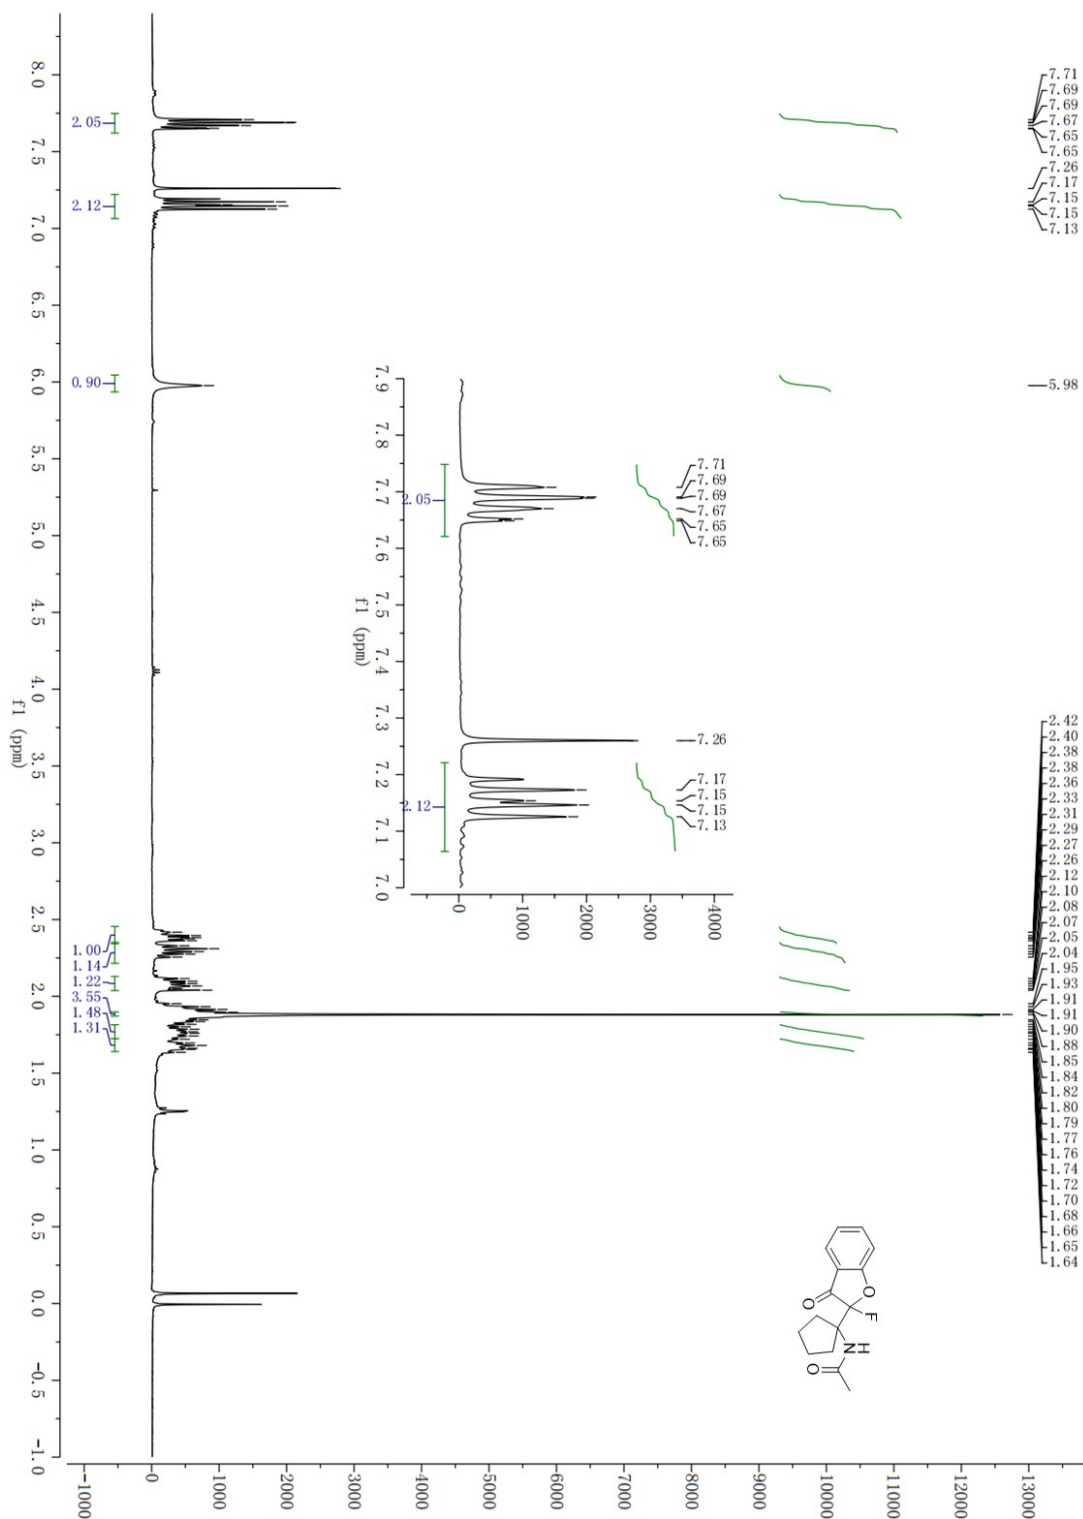

<sup>19</sup>F NMR

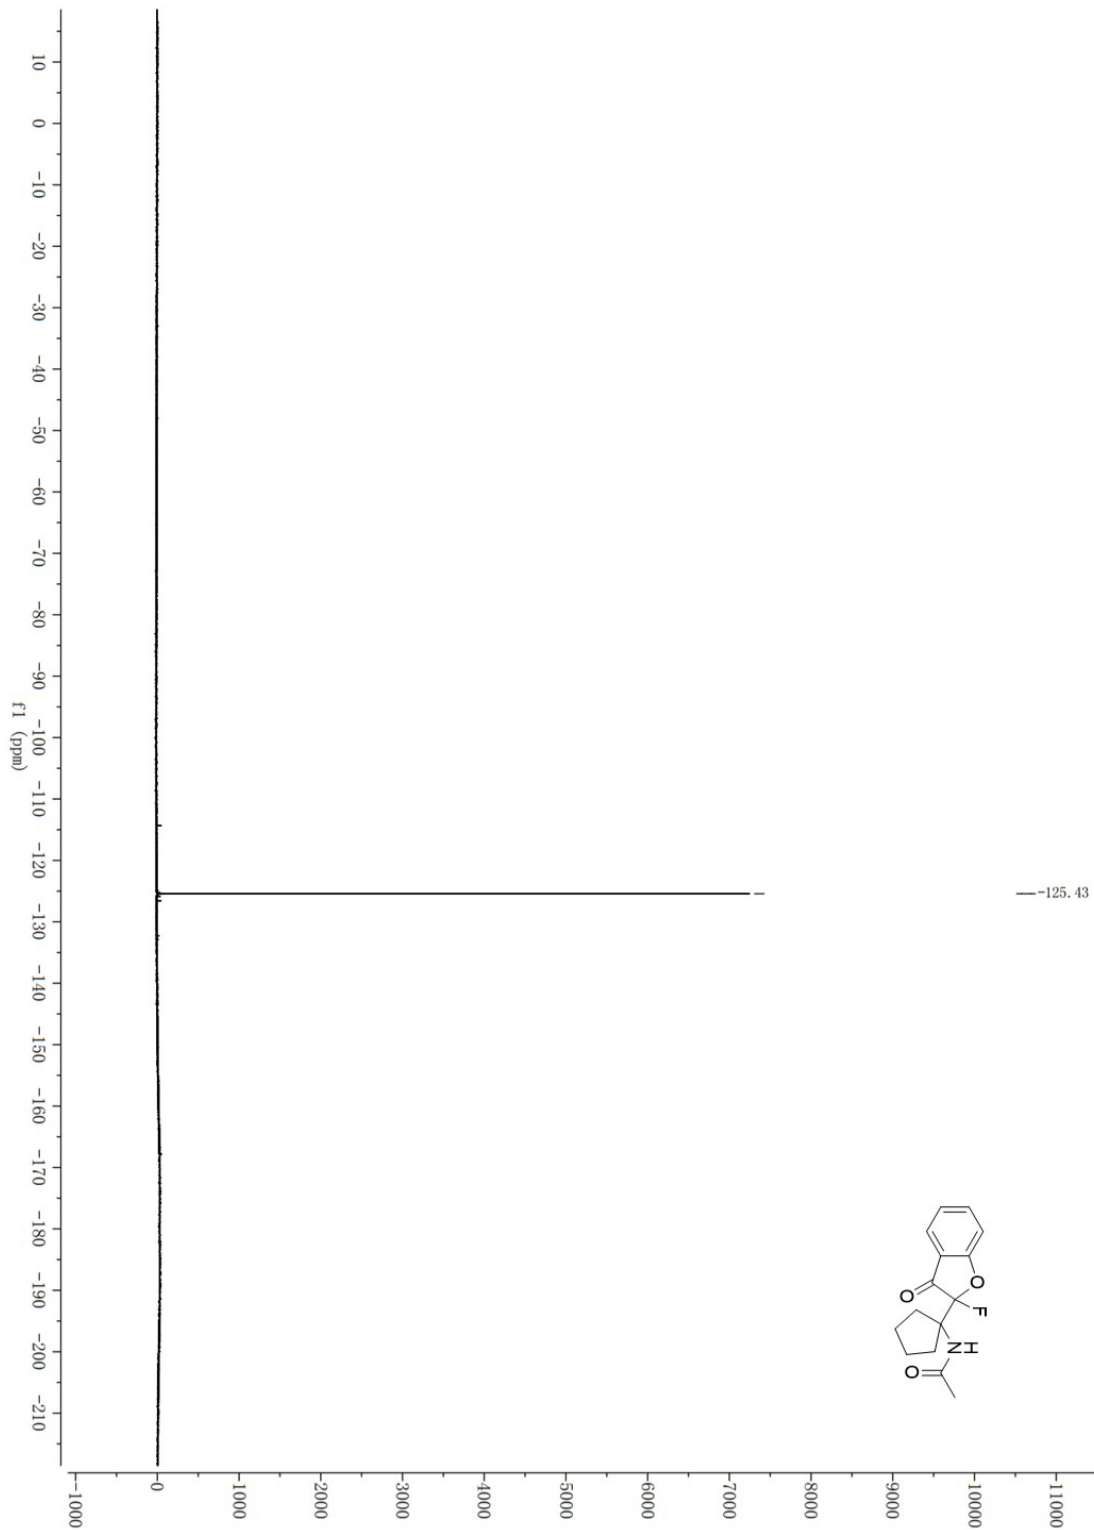

<sup>13</sup>C NMR

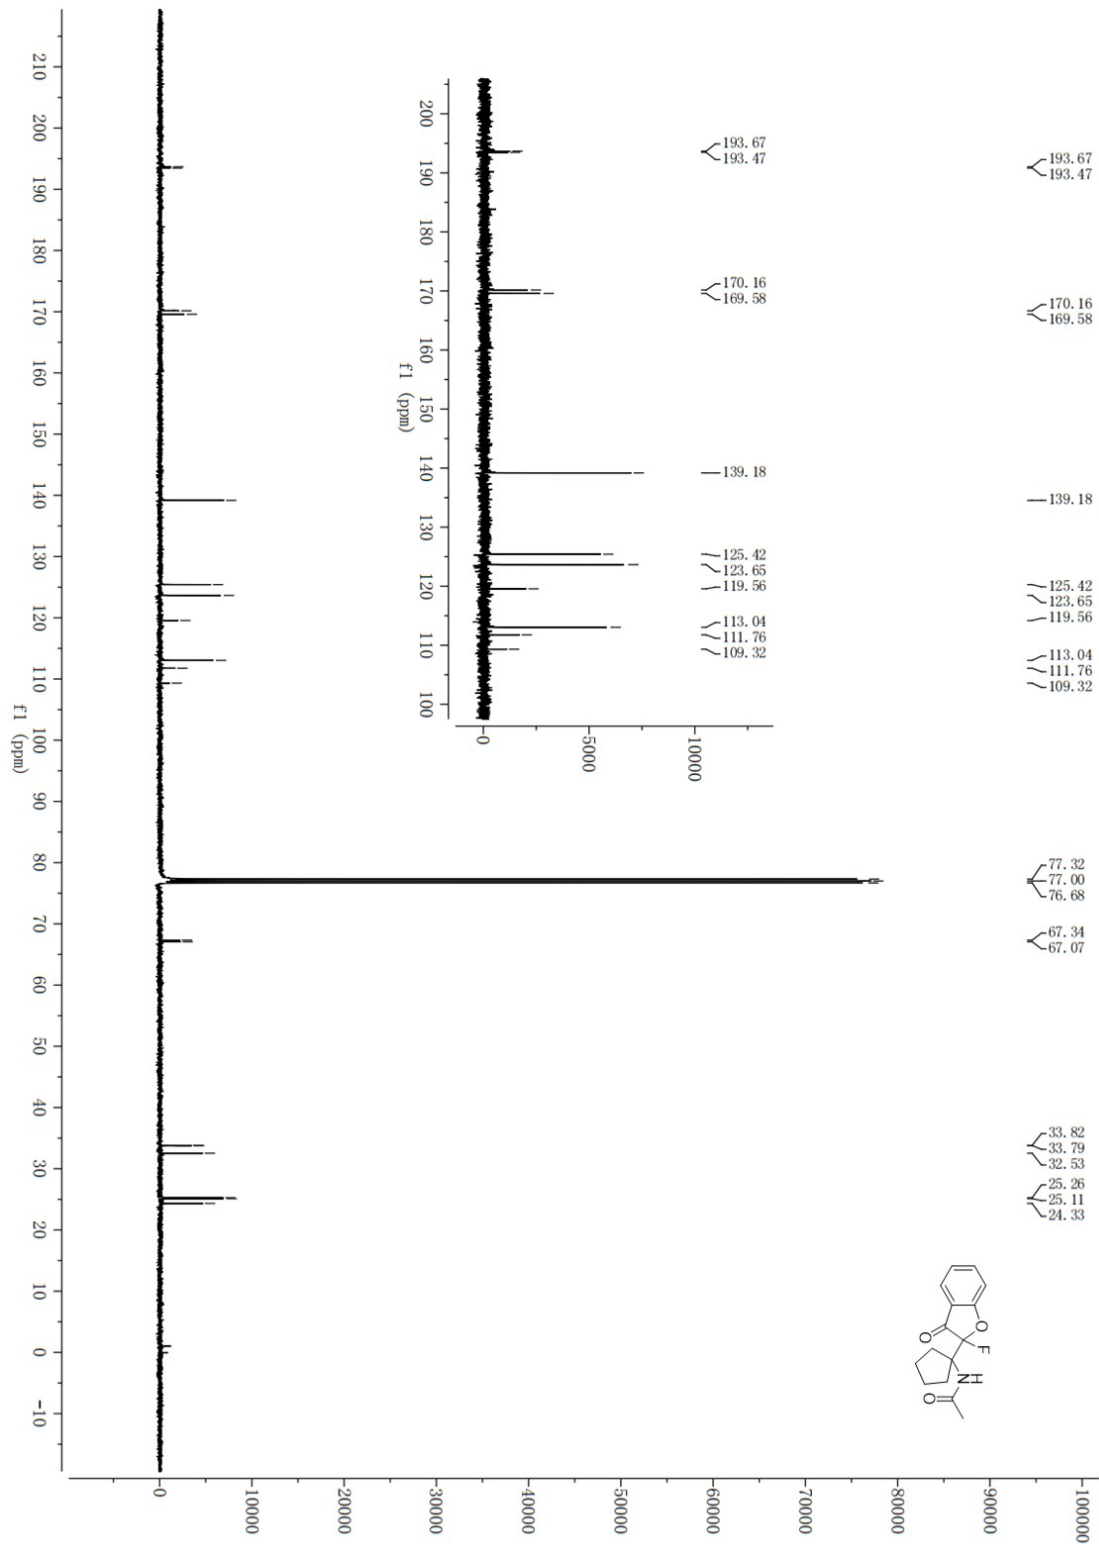

**(2f)**  
<sup>1</sup>H NMR

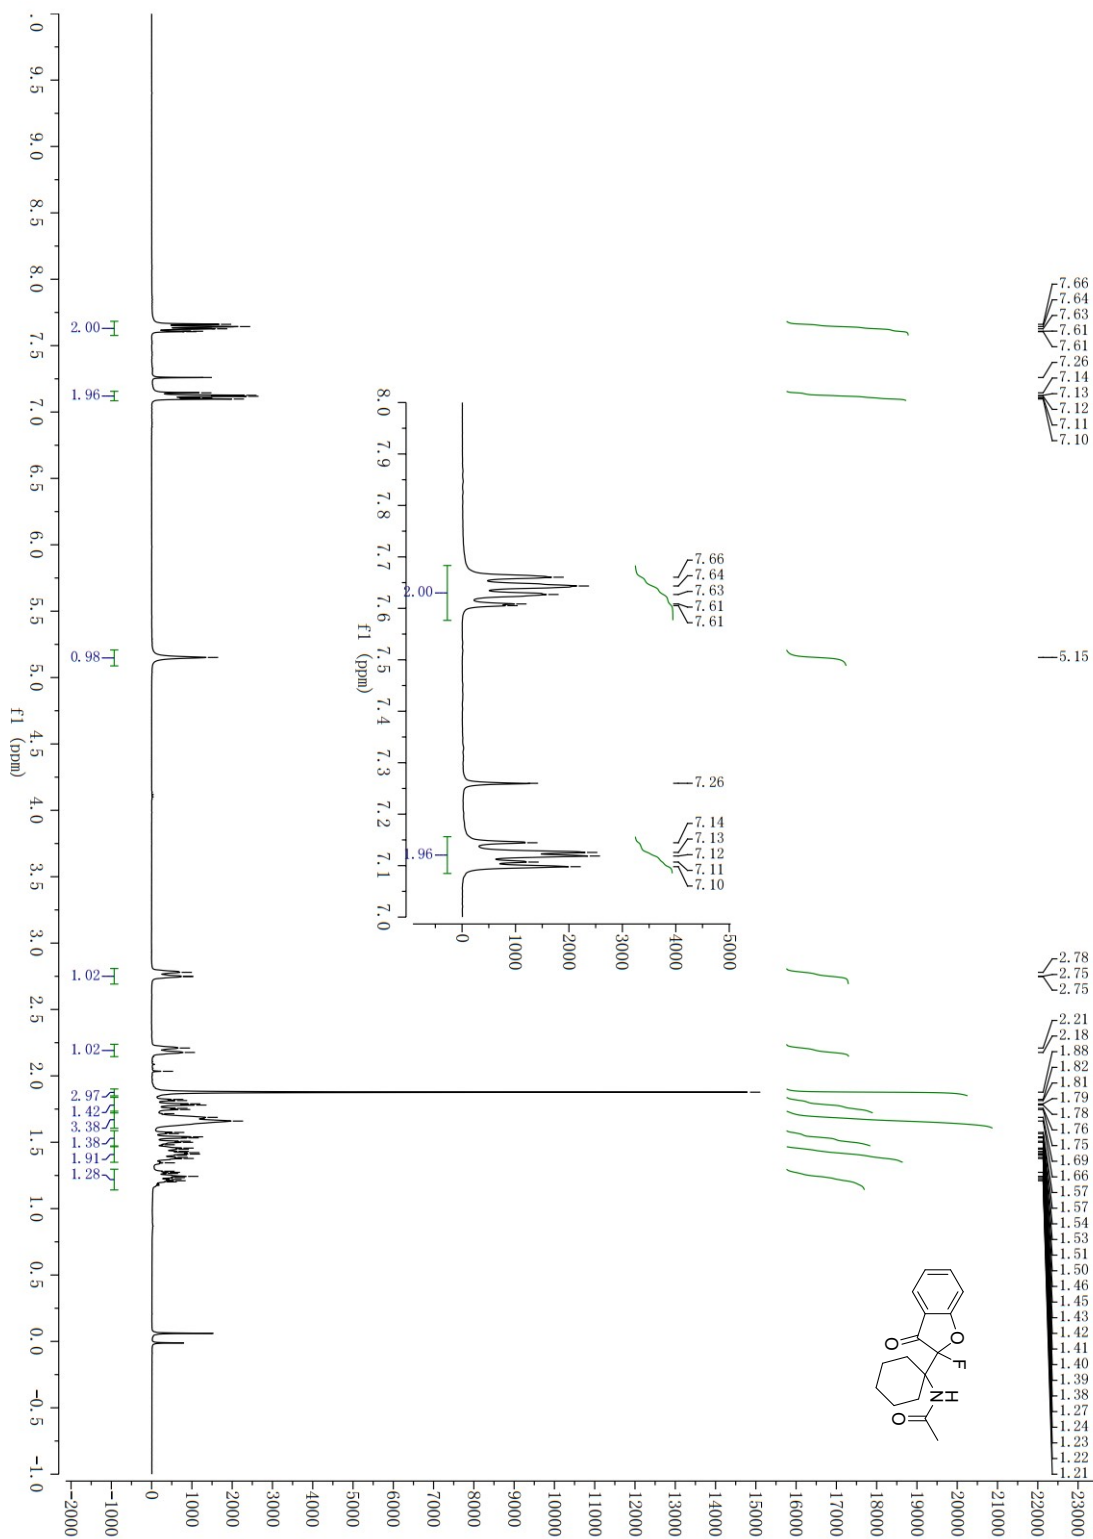

<sup>19</sup>F NMR

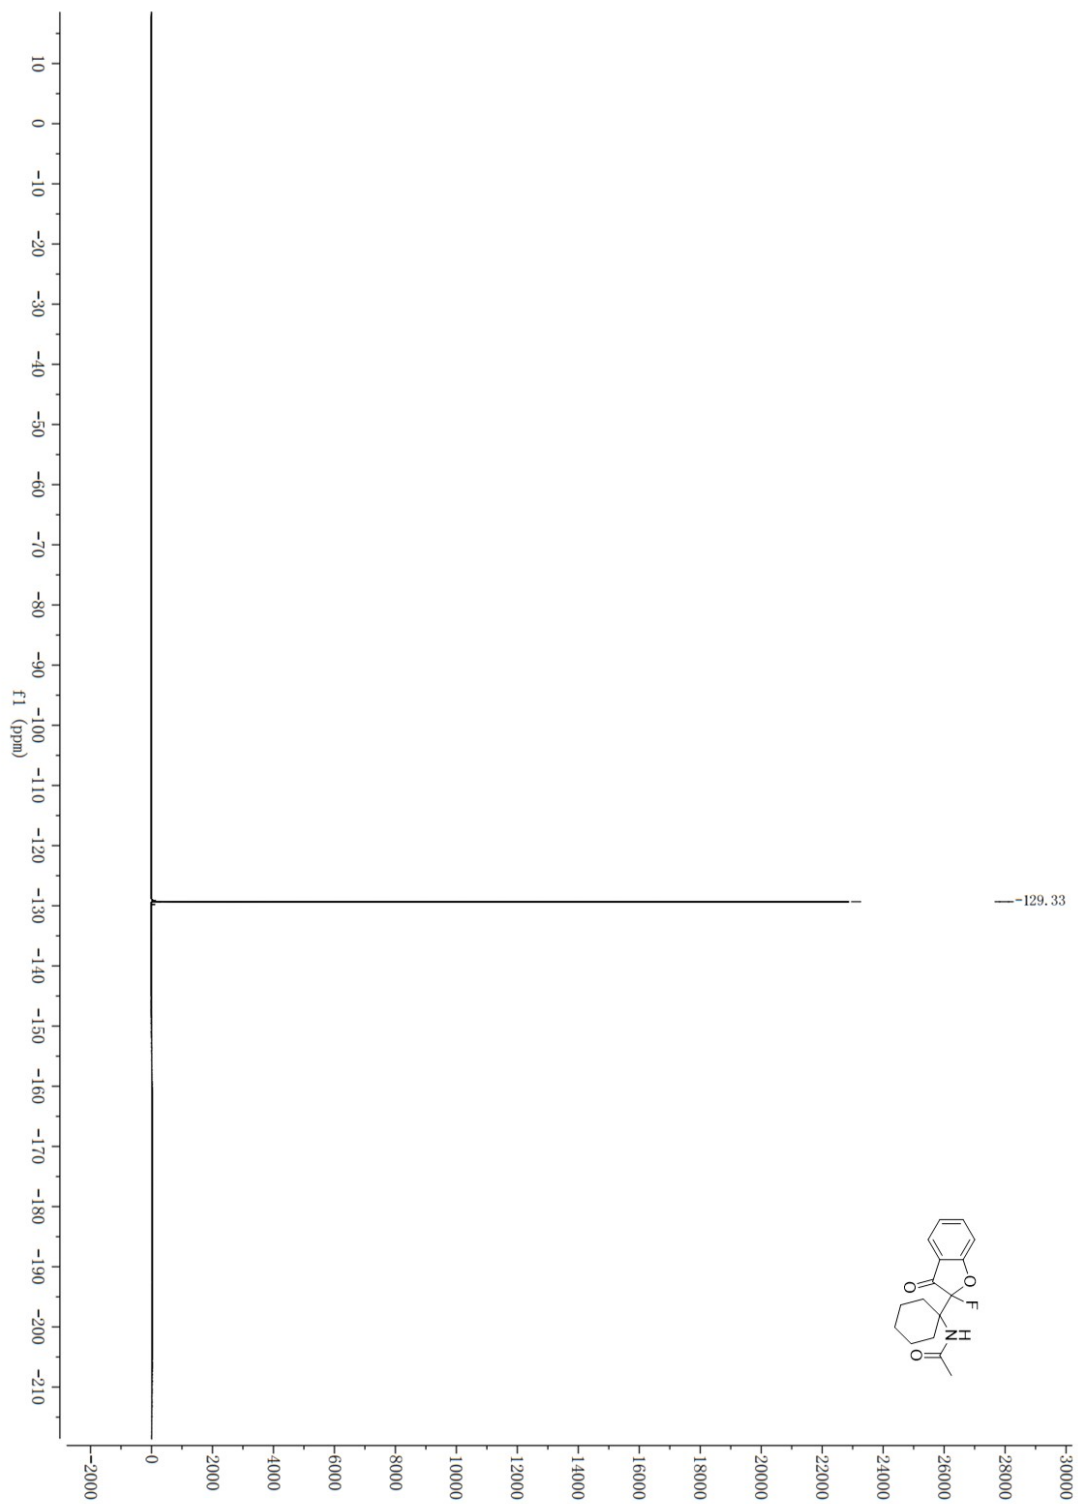

$^{13}\text{C}$  NMR

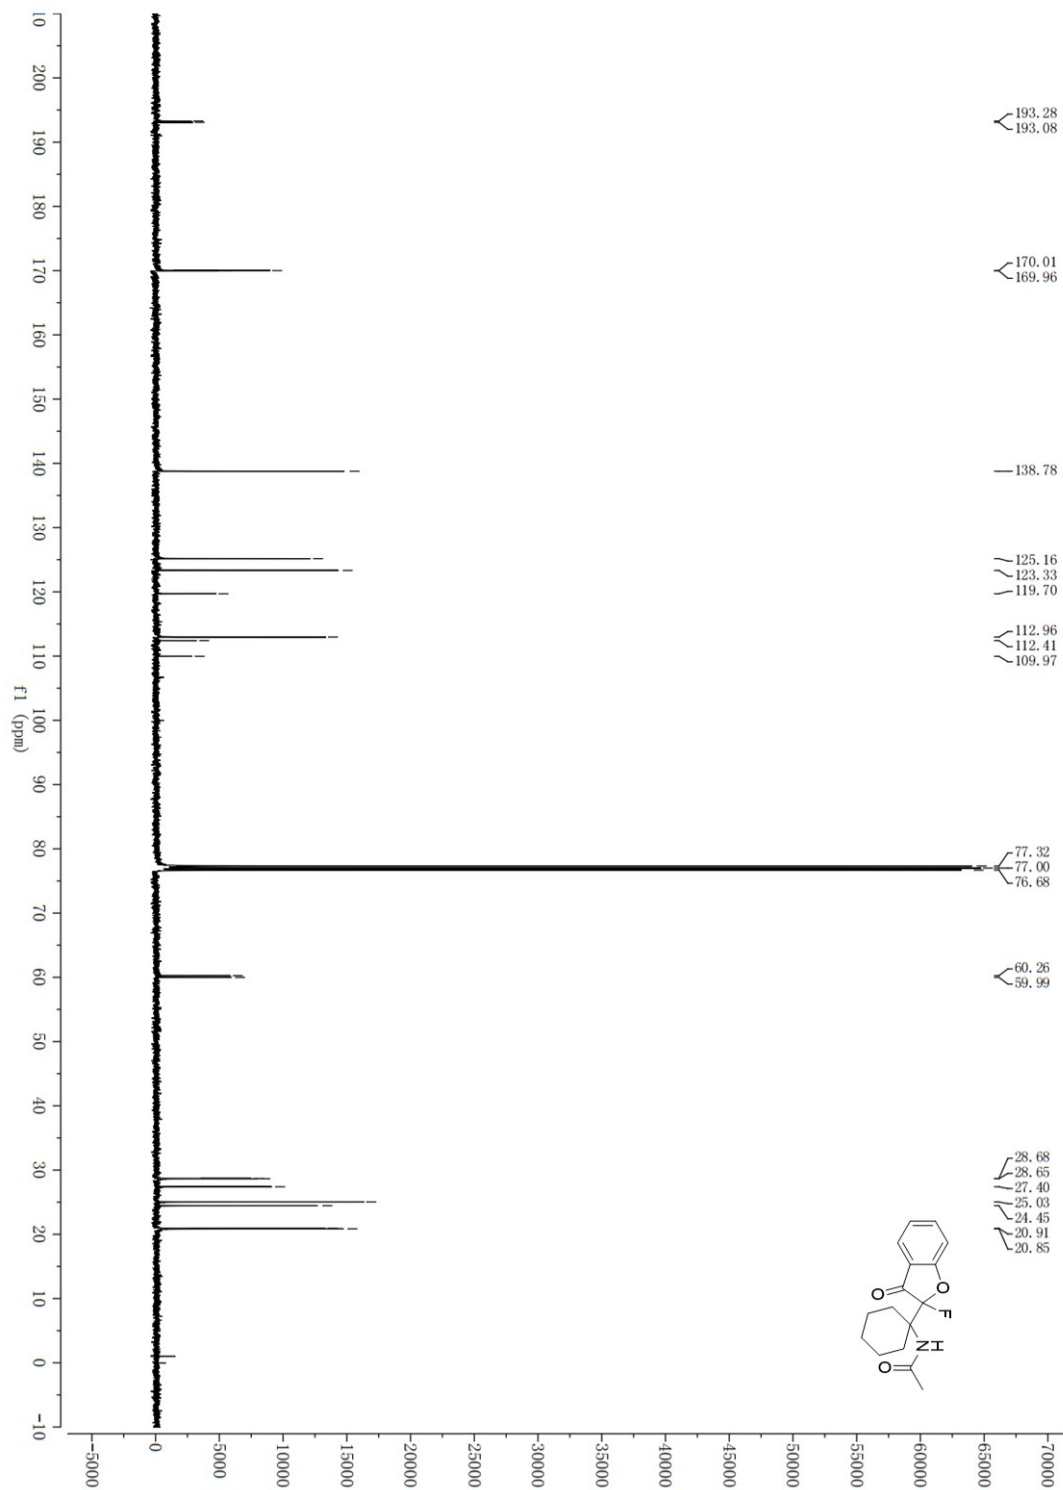

(2g)  
<sup>1</sup>H NMR

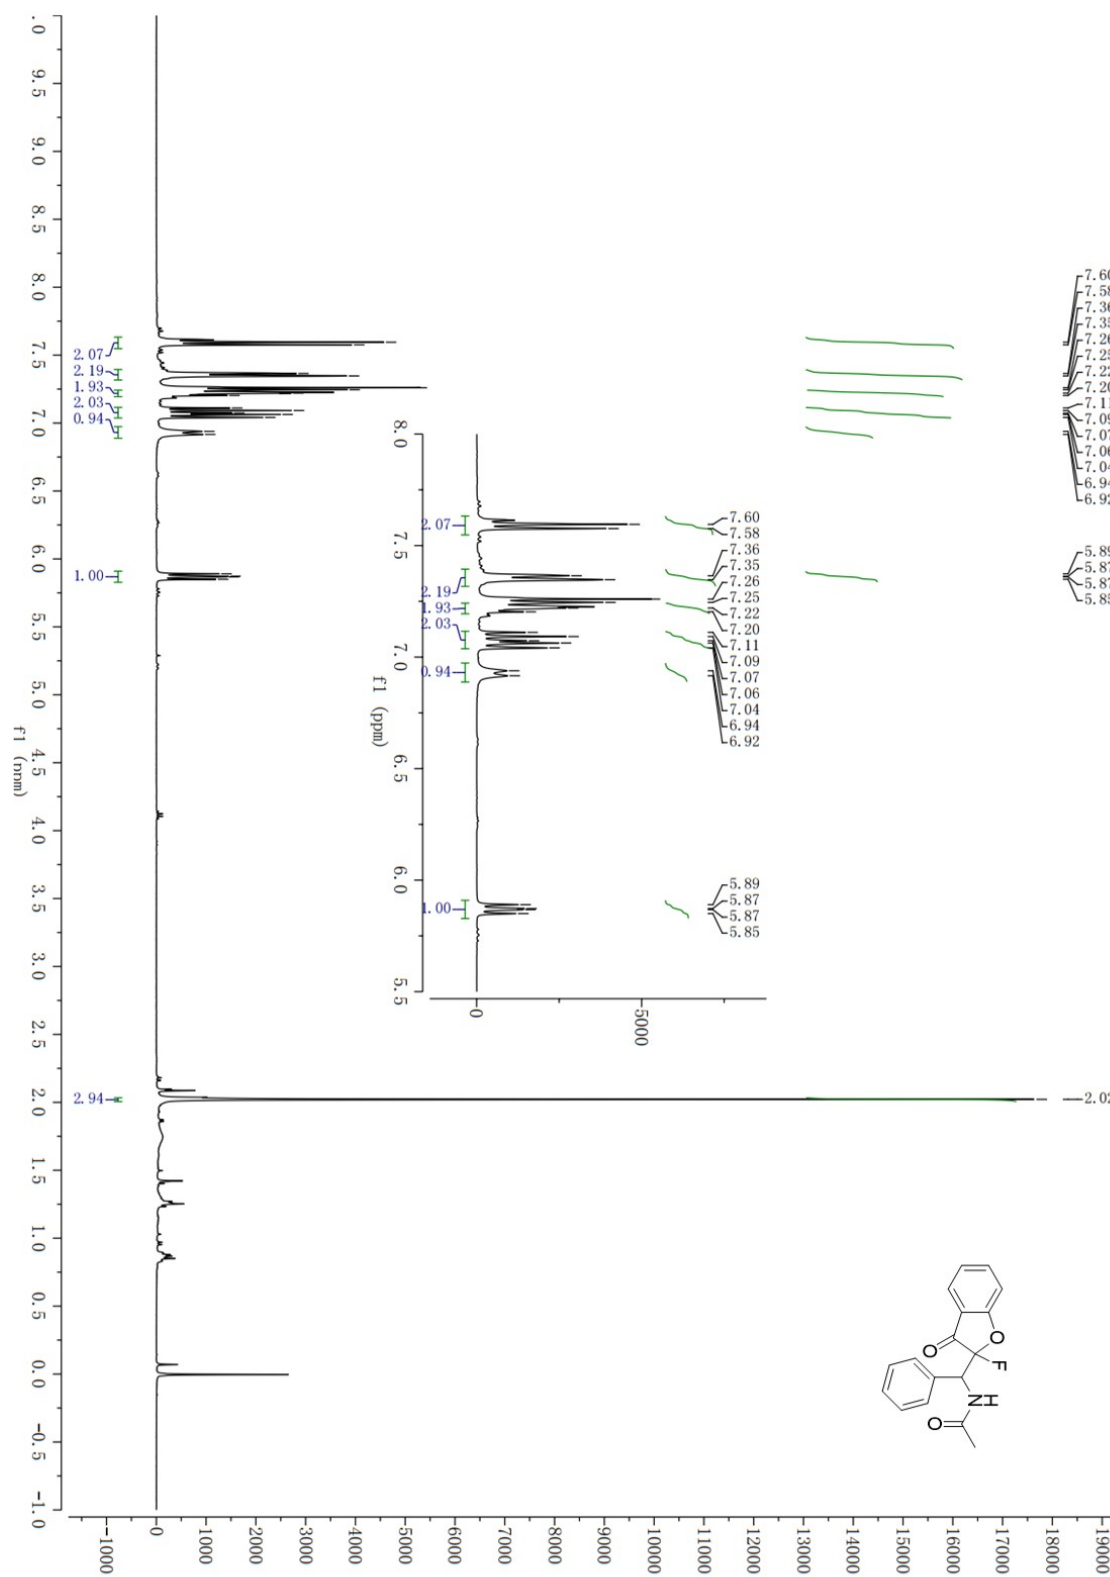



$^{19}\text{F}$  NMR

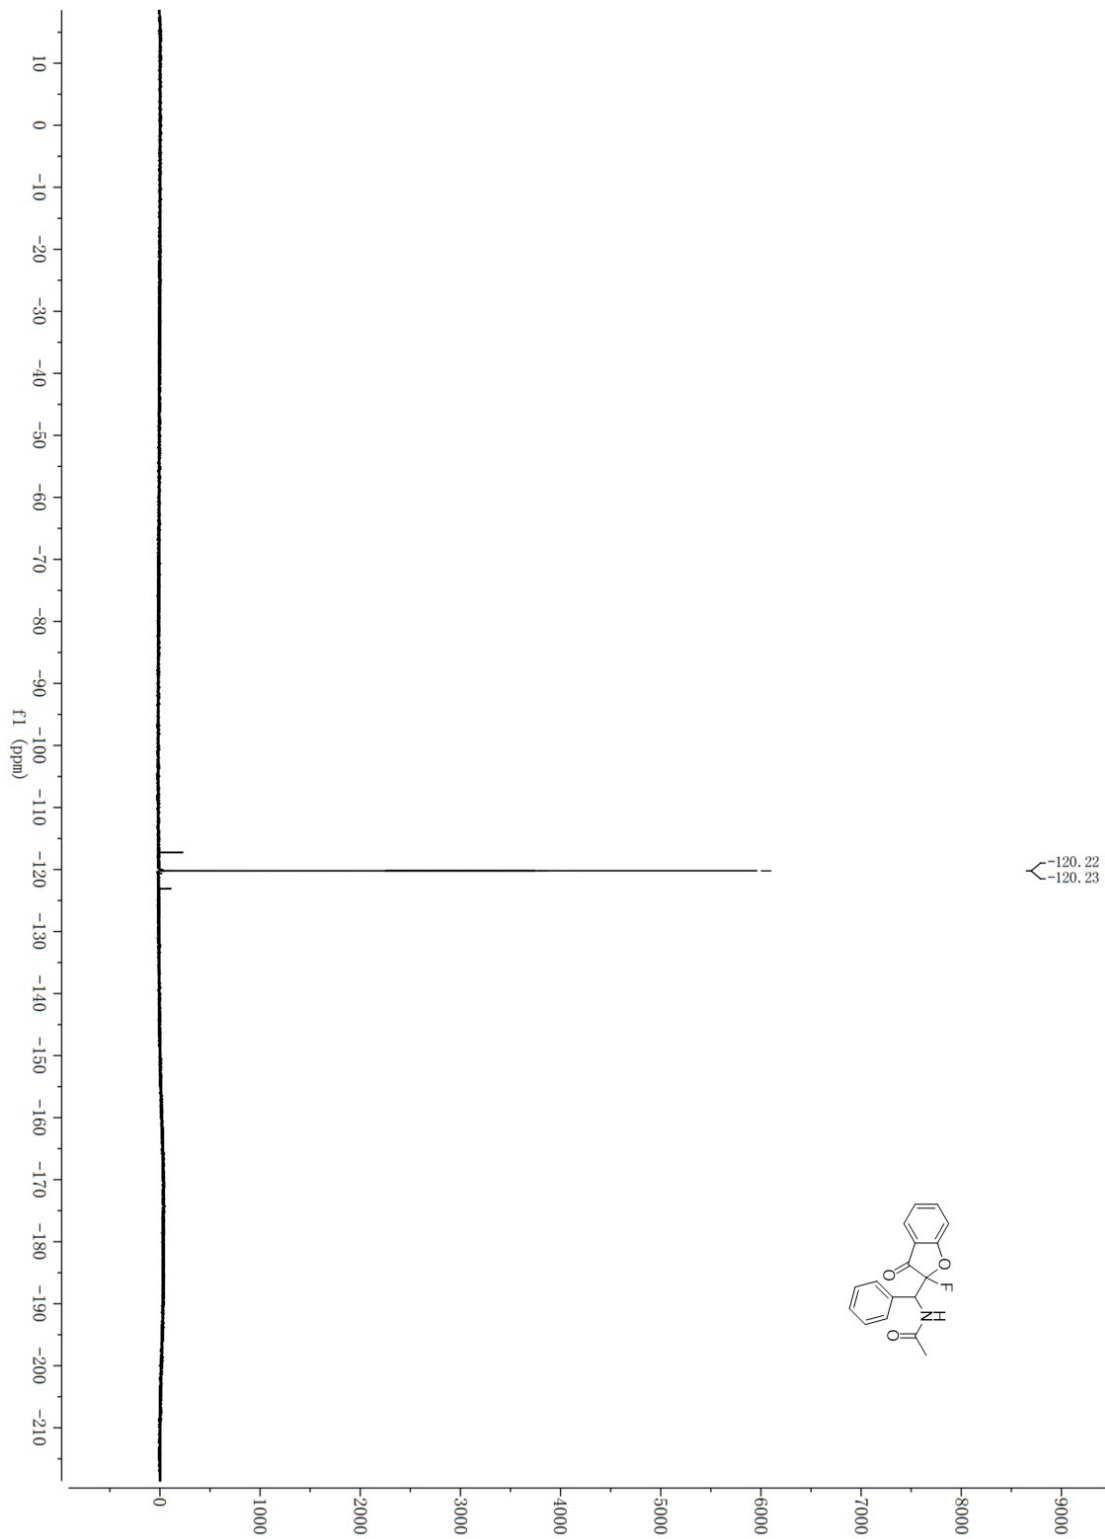

<sup>13</sup>C NMR

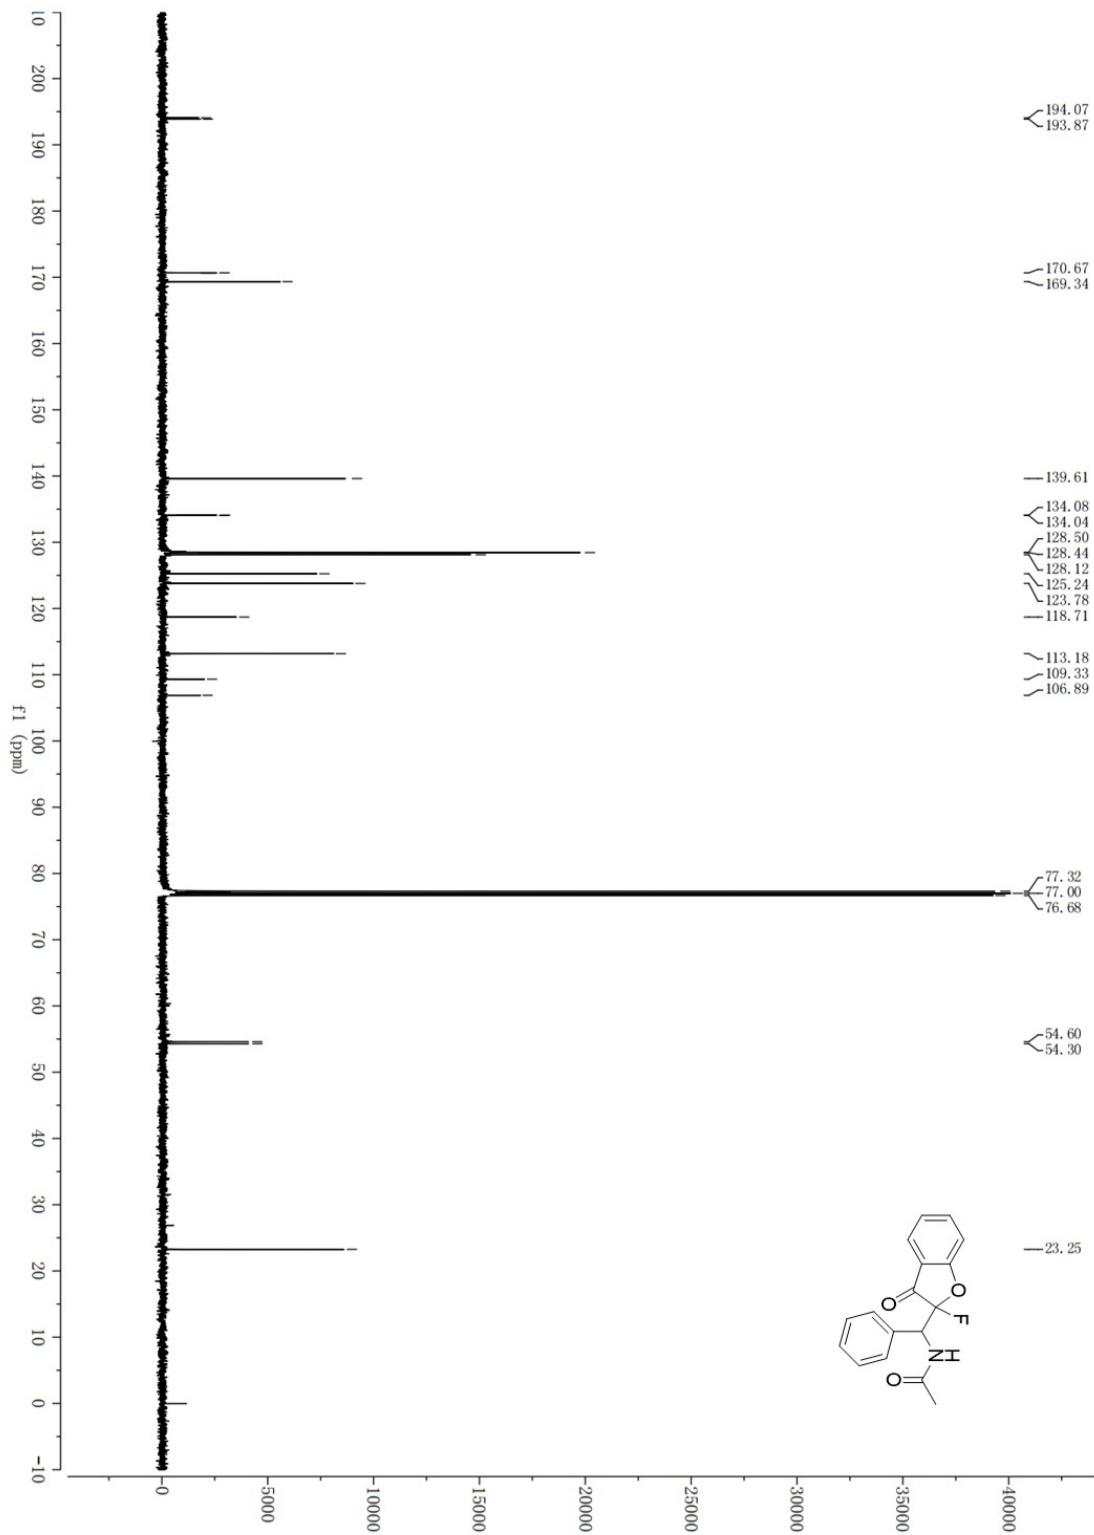

**(2h)**  
<sup>1</sup>H NMR

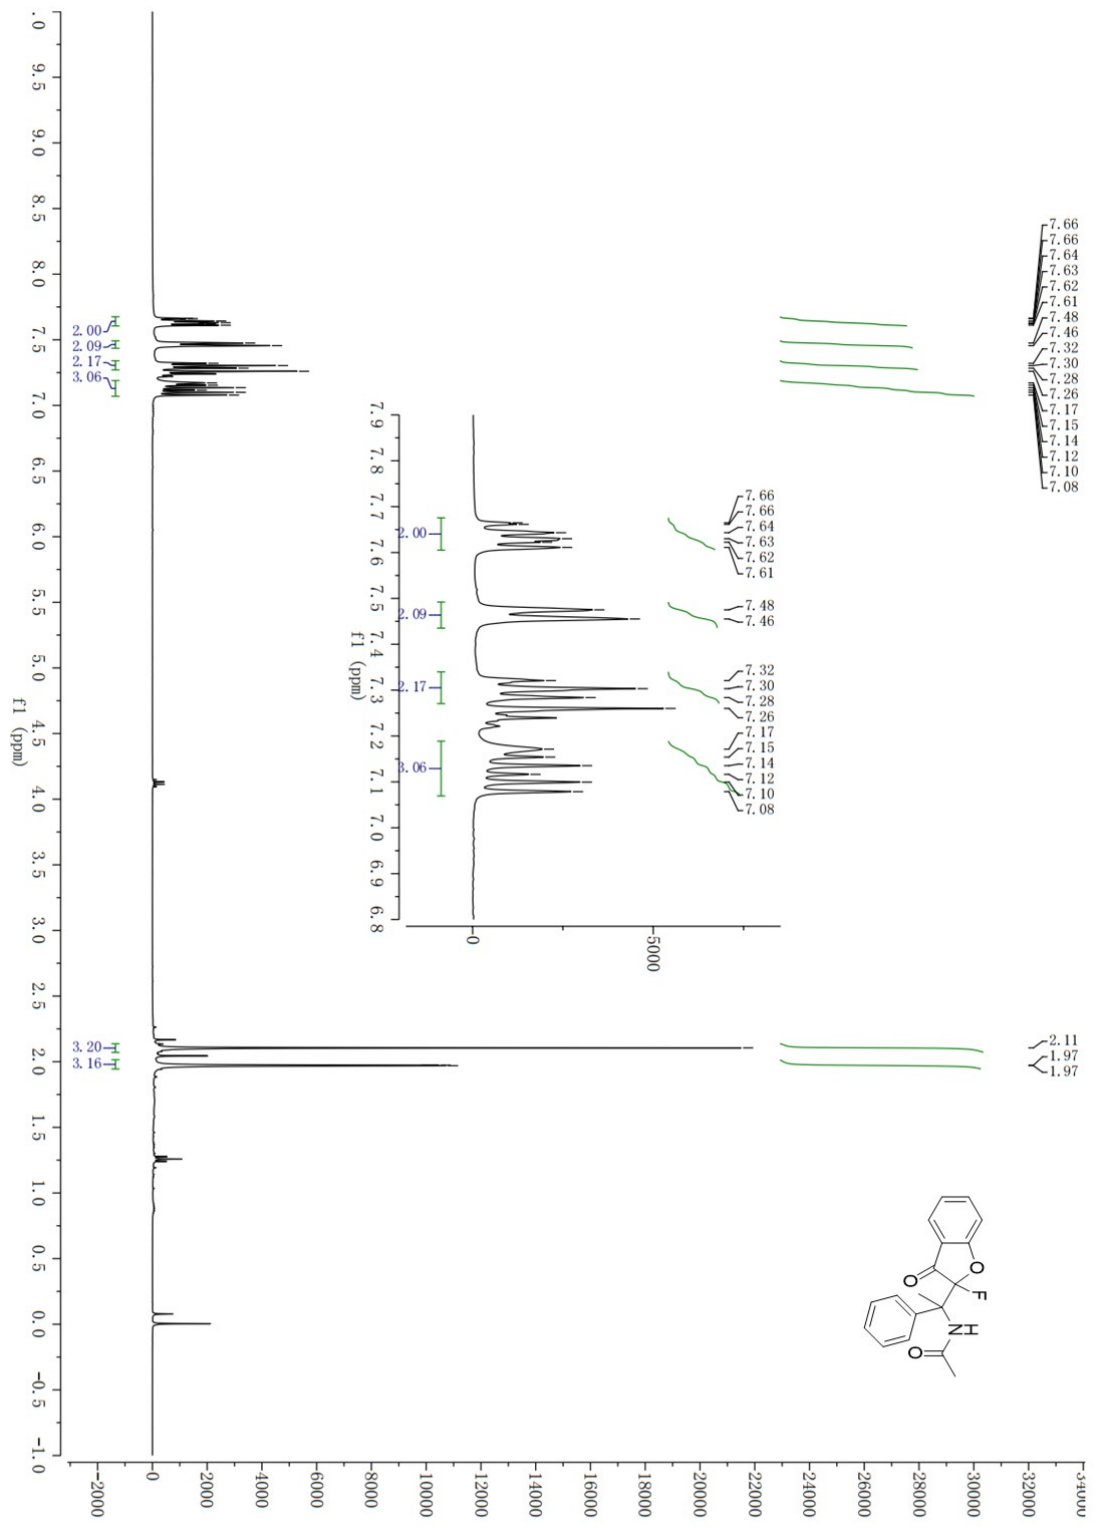

<sup>19</sup>F NMR

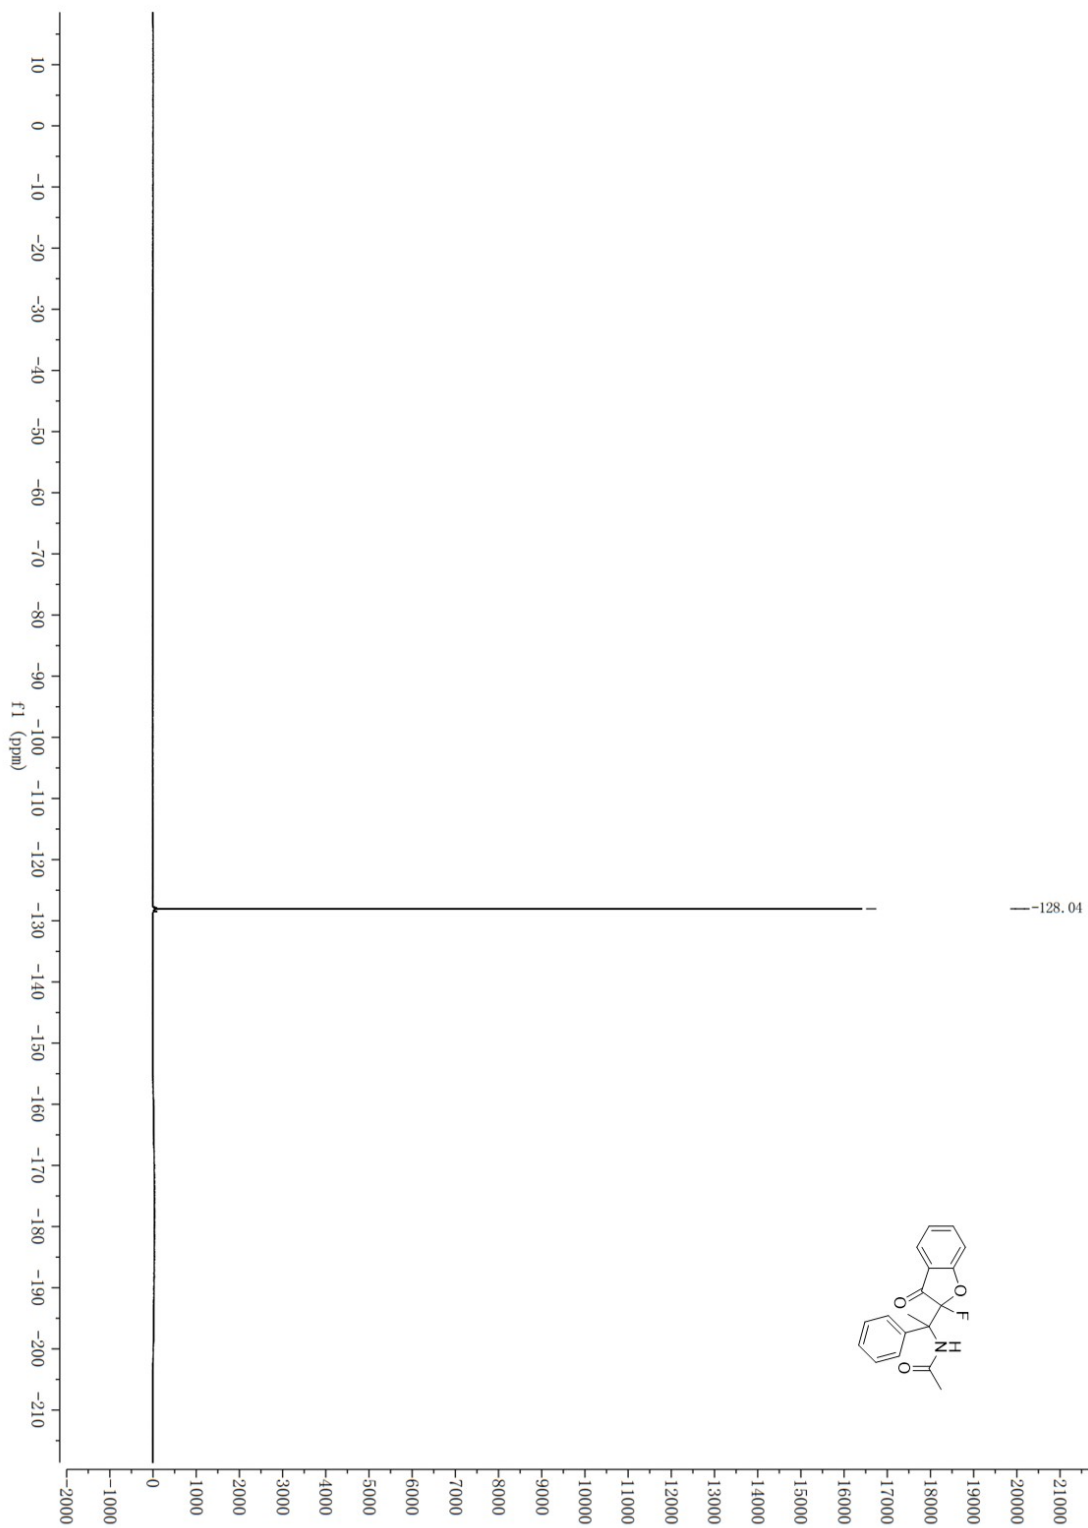

<sup>13</sup>C NMR

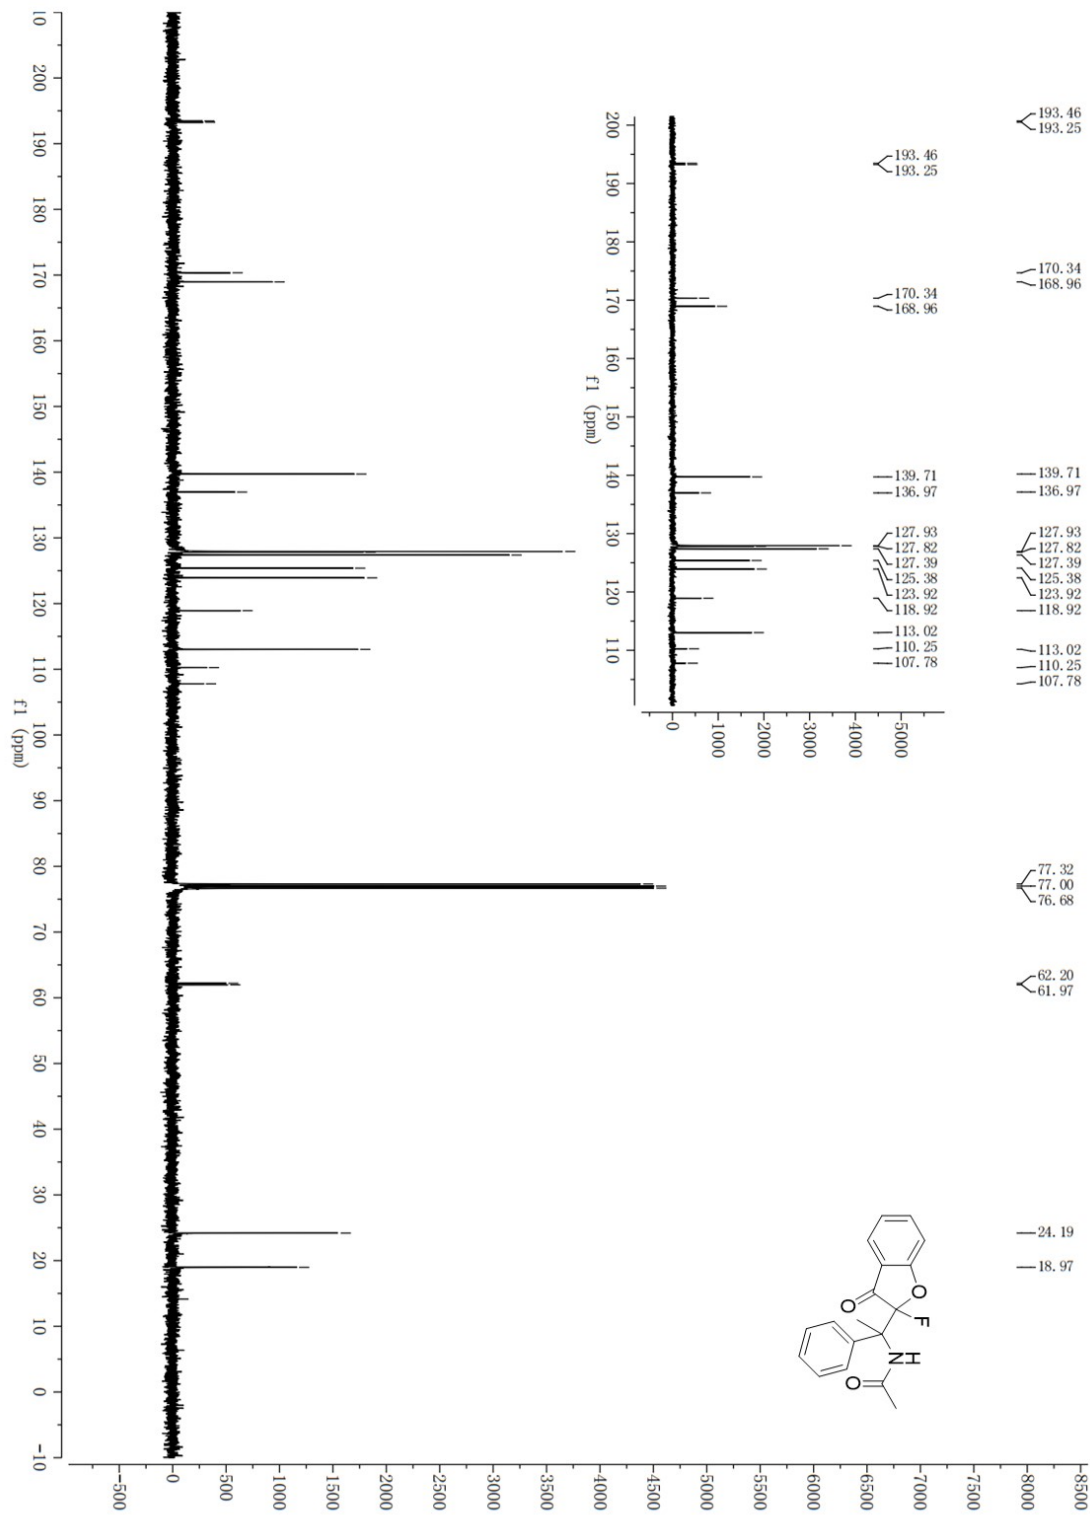

(2i)  
<sup>1</sup>H NMR

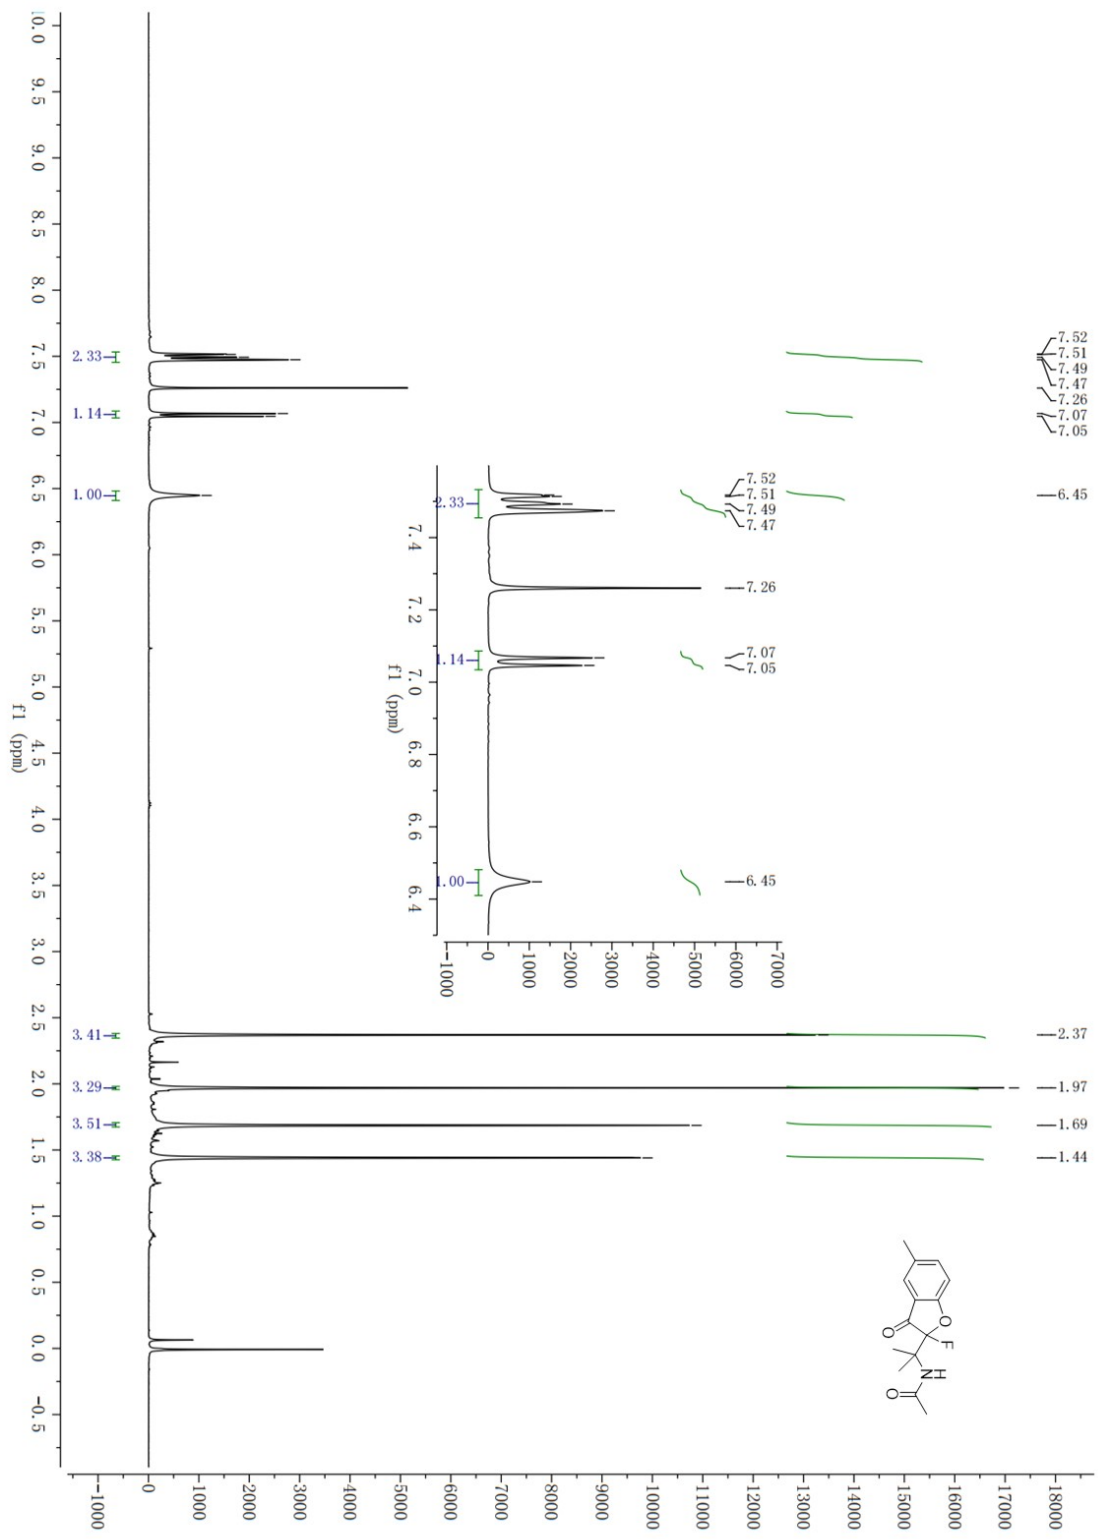

$^{19}\text{F}$  NMR

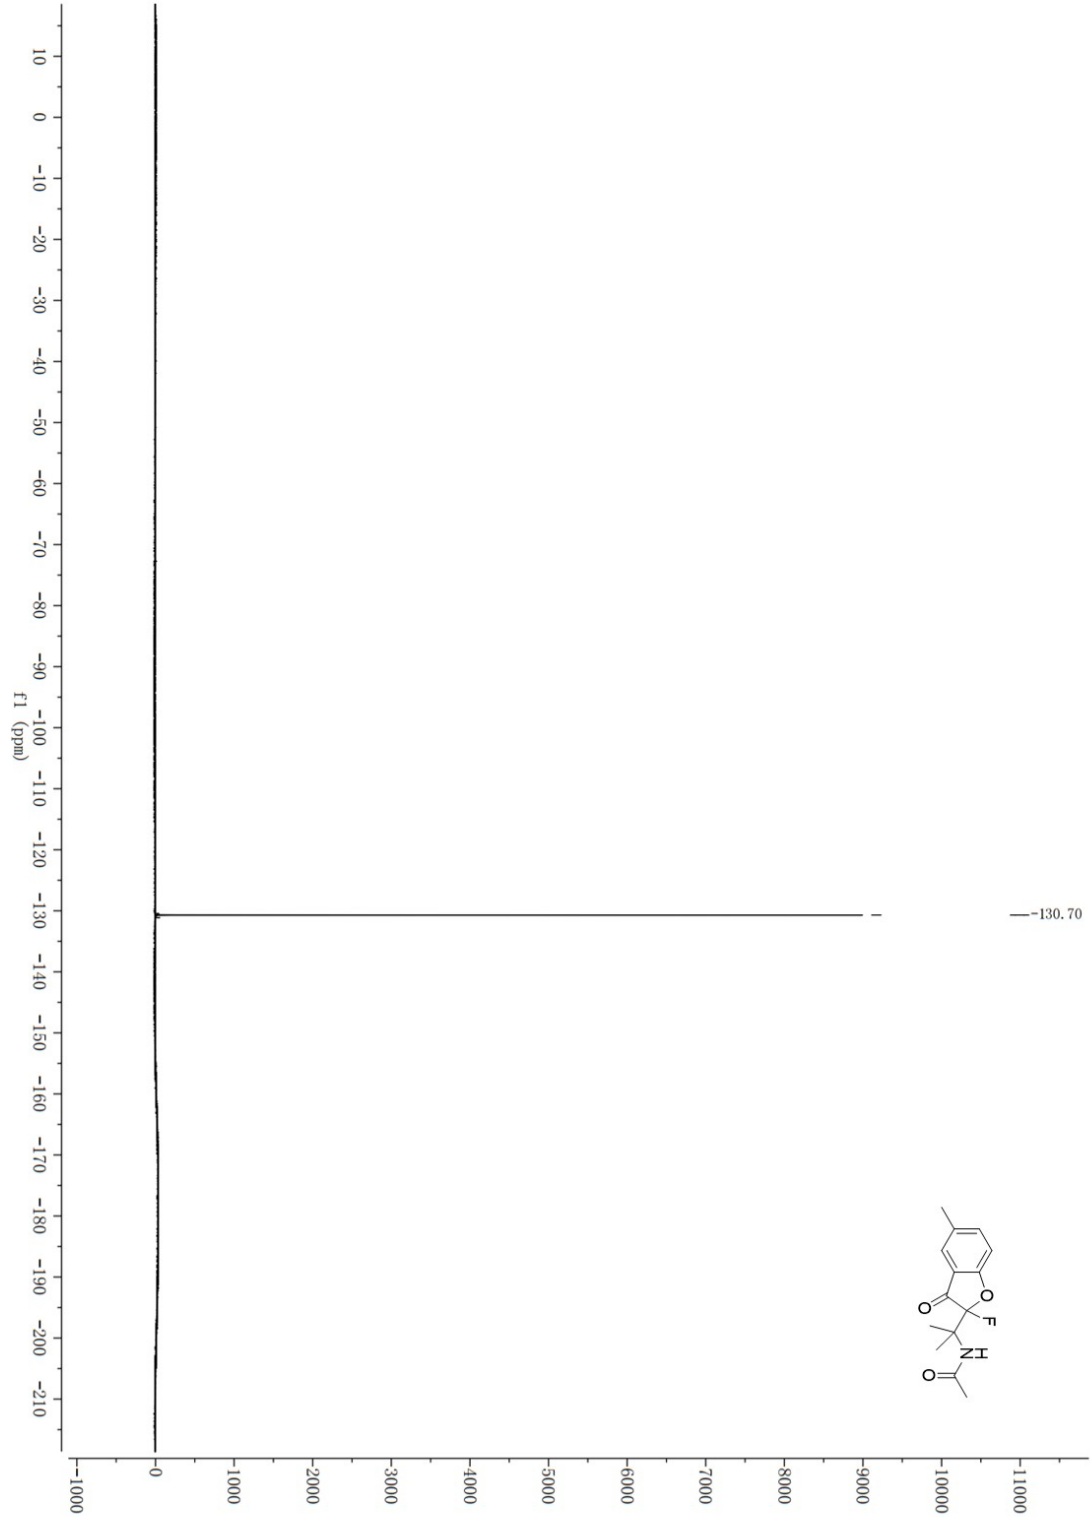

<sup>13</sup>C NMR

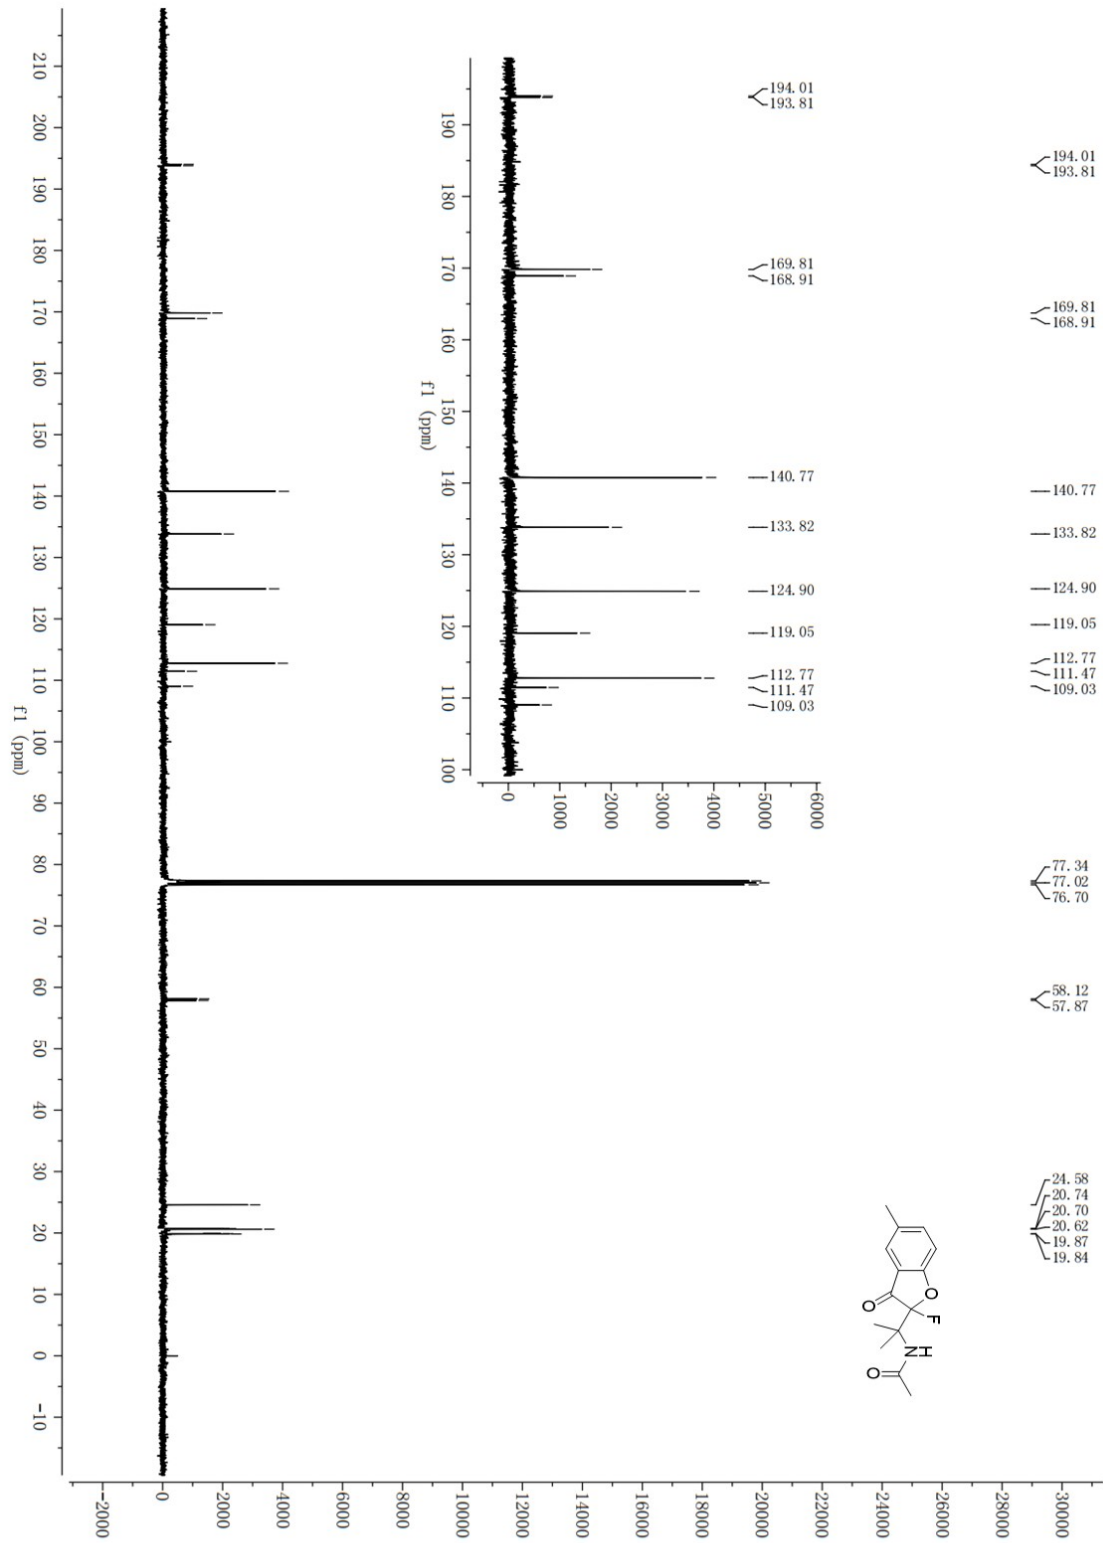



(2j)  
<sup>1</sup>H NMR

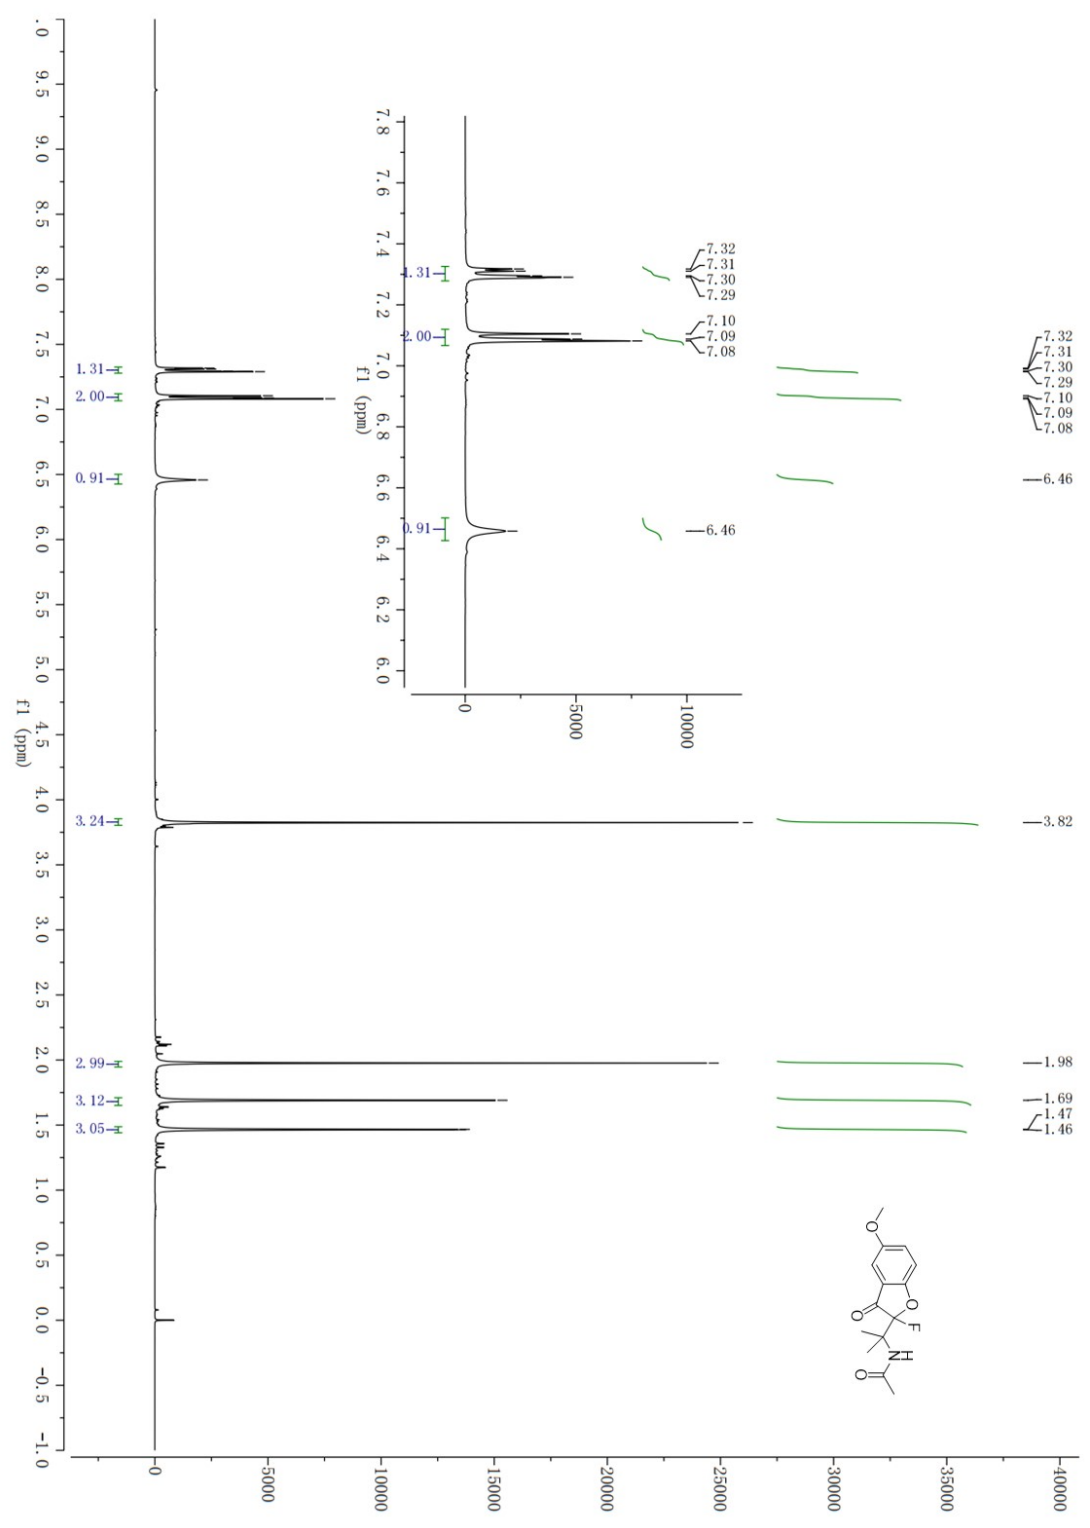

<sup>19</sup>F NMR

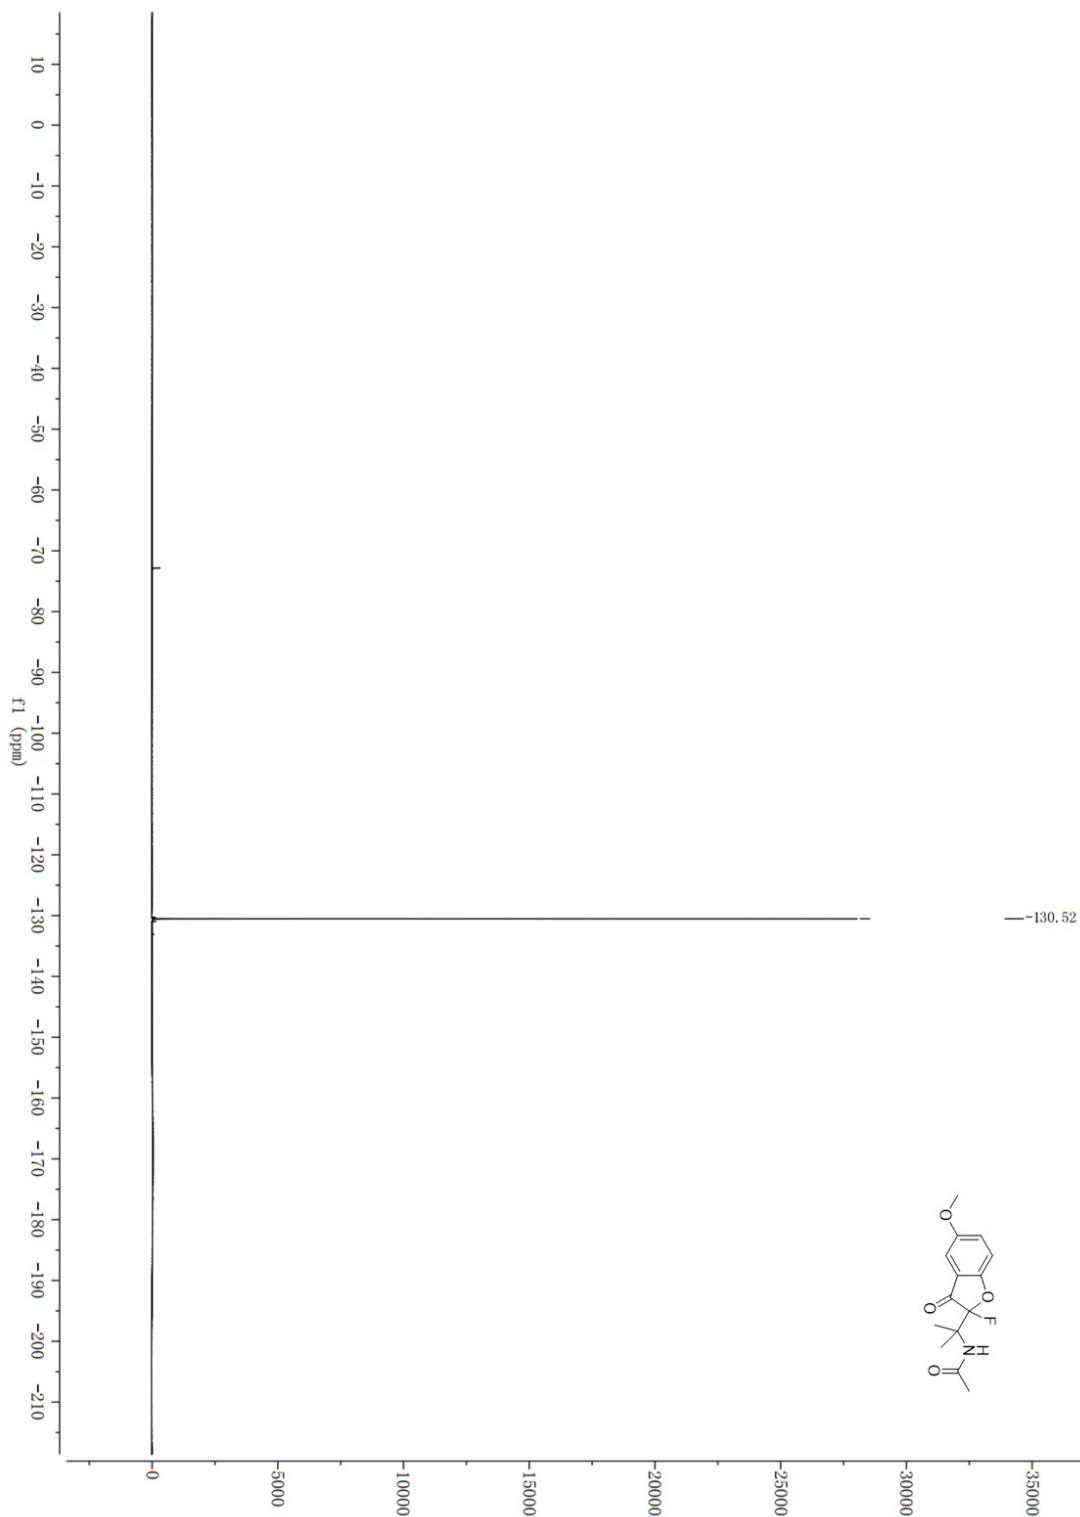

<sup>13</sup>C NMR

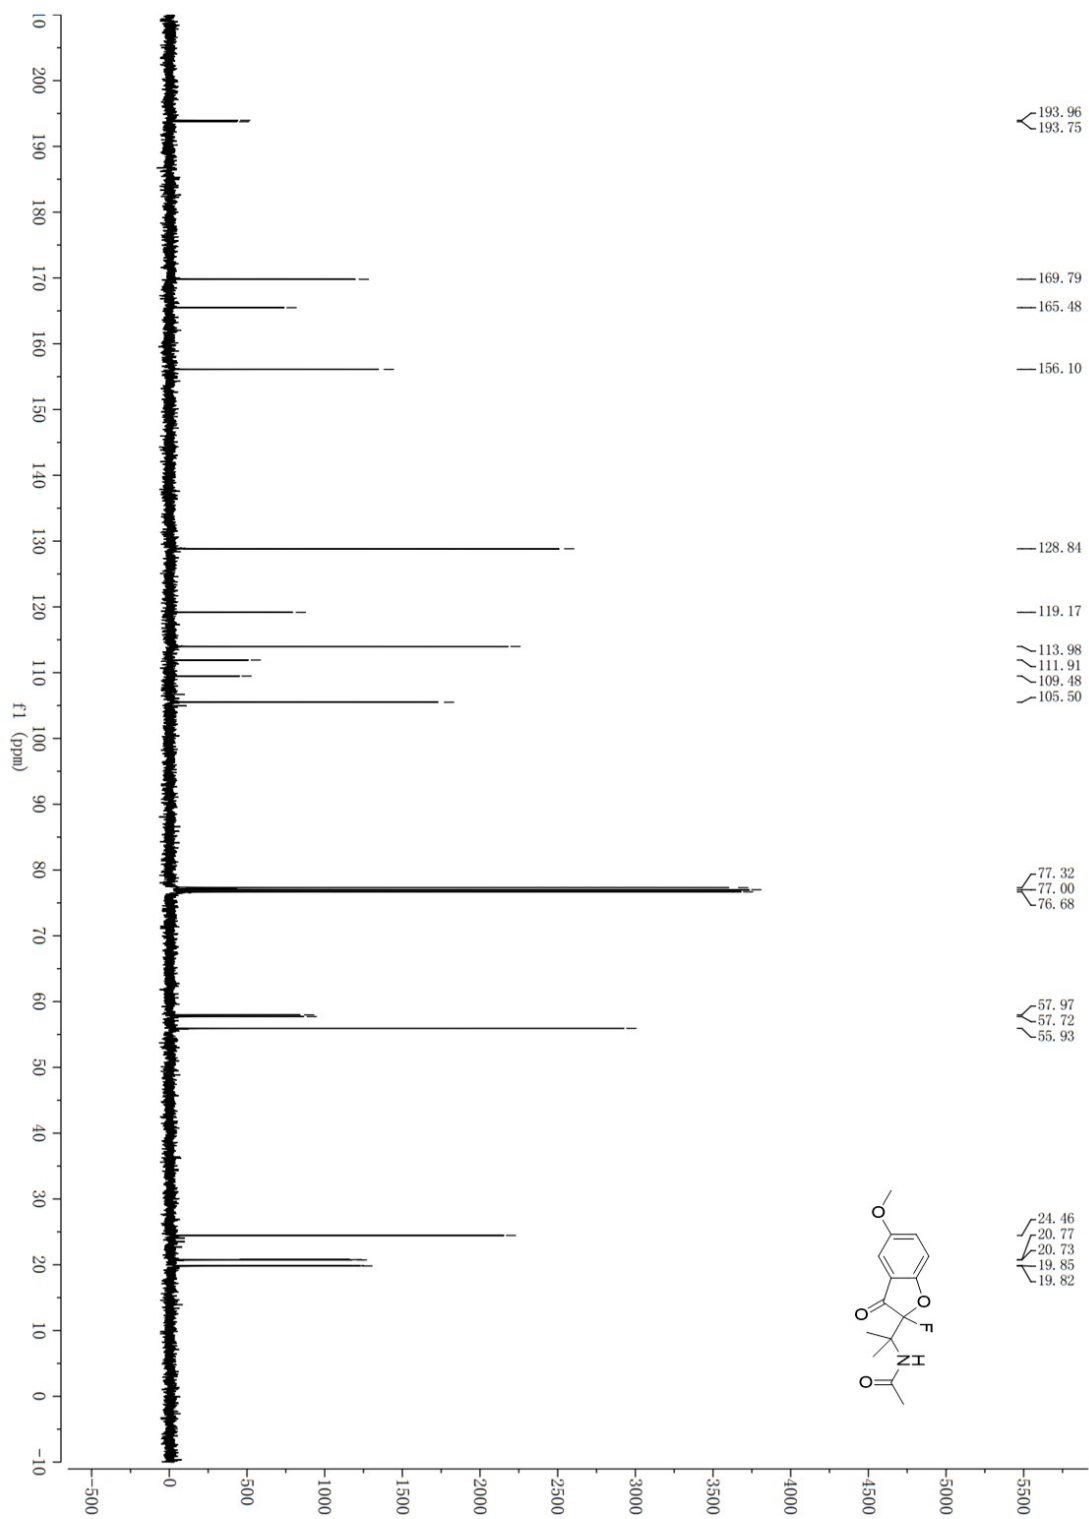

**(2k)**  
<sup>1</sup>H NMR

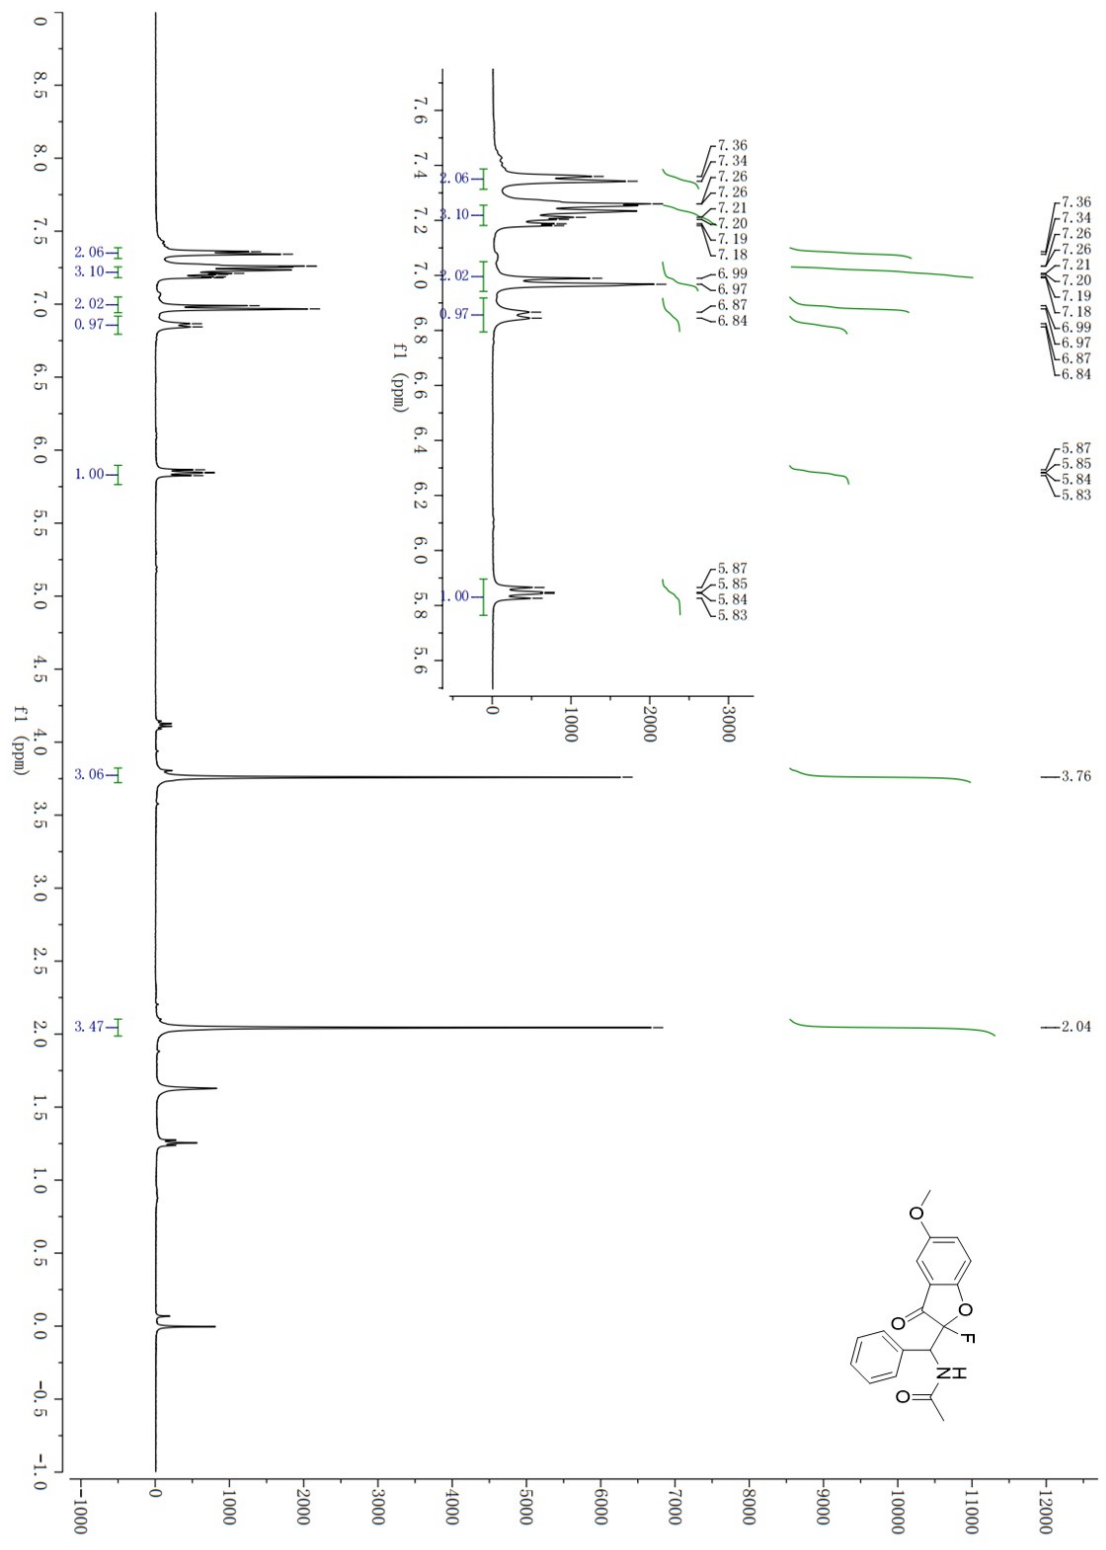

19F NMR

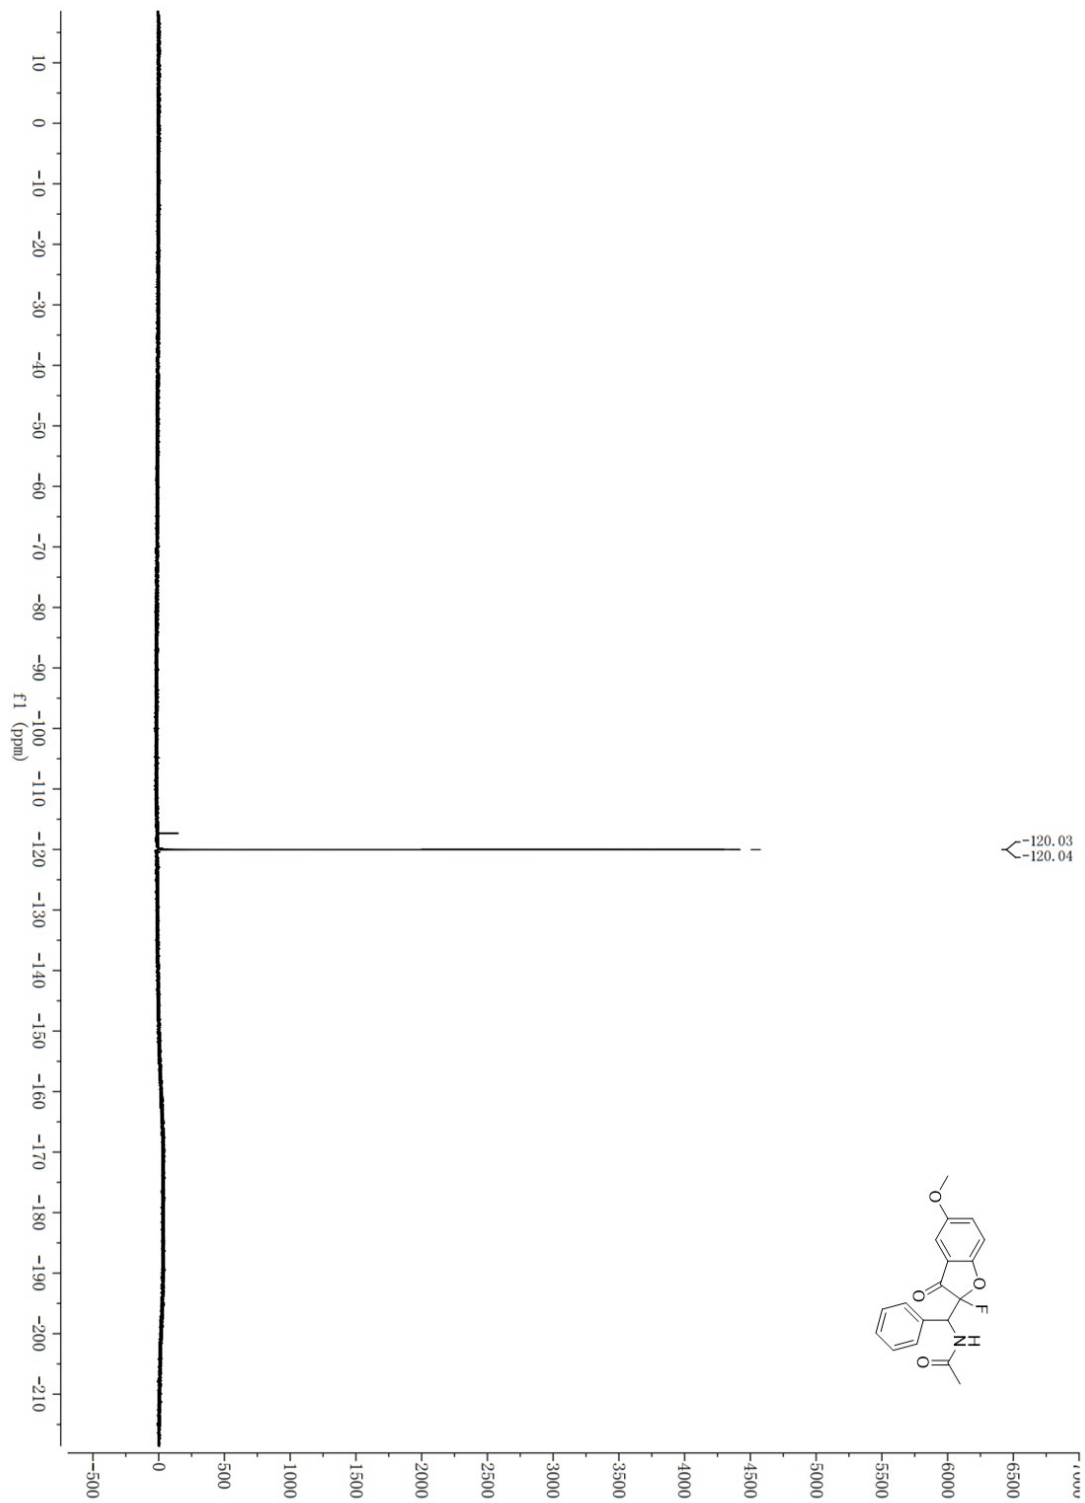

<sup>13</sup>C NMR

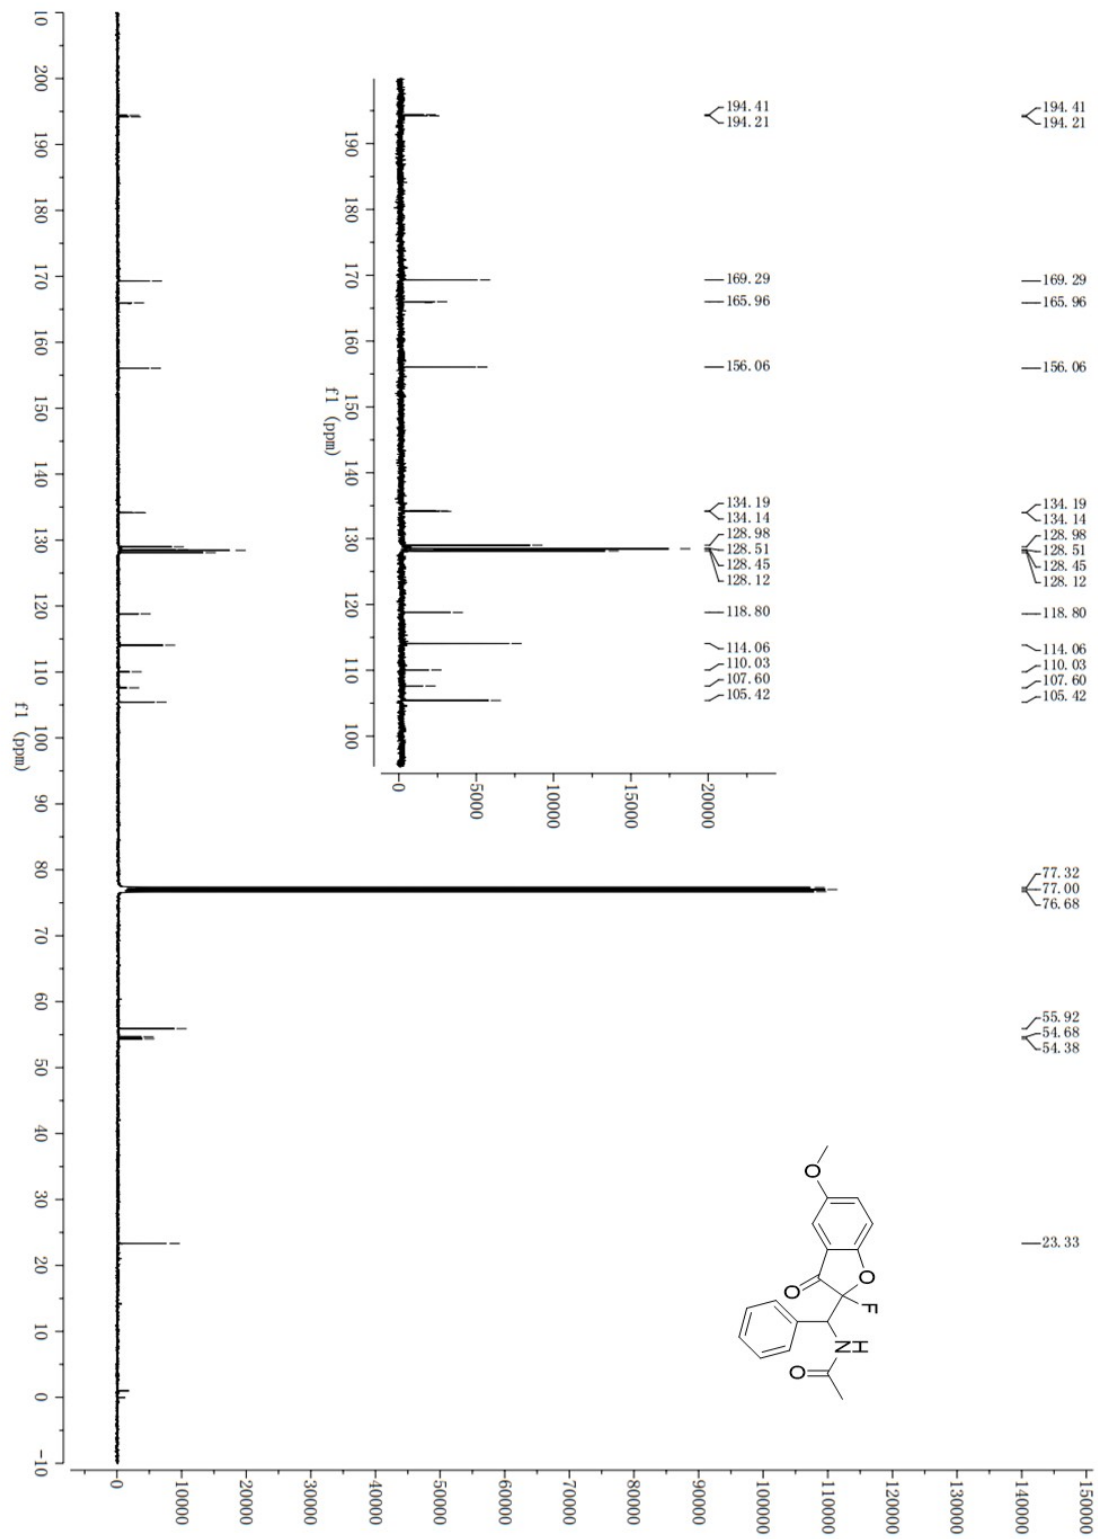

(21)  
<sup>1</sup>H NMR

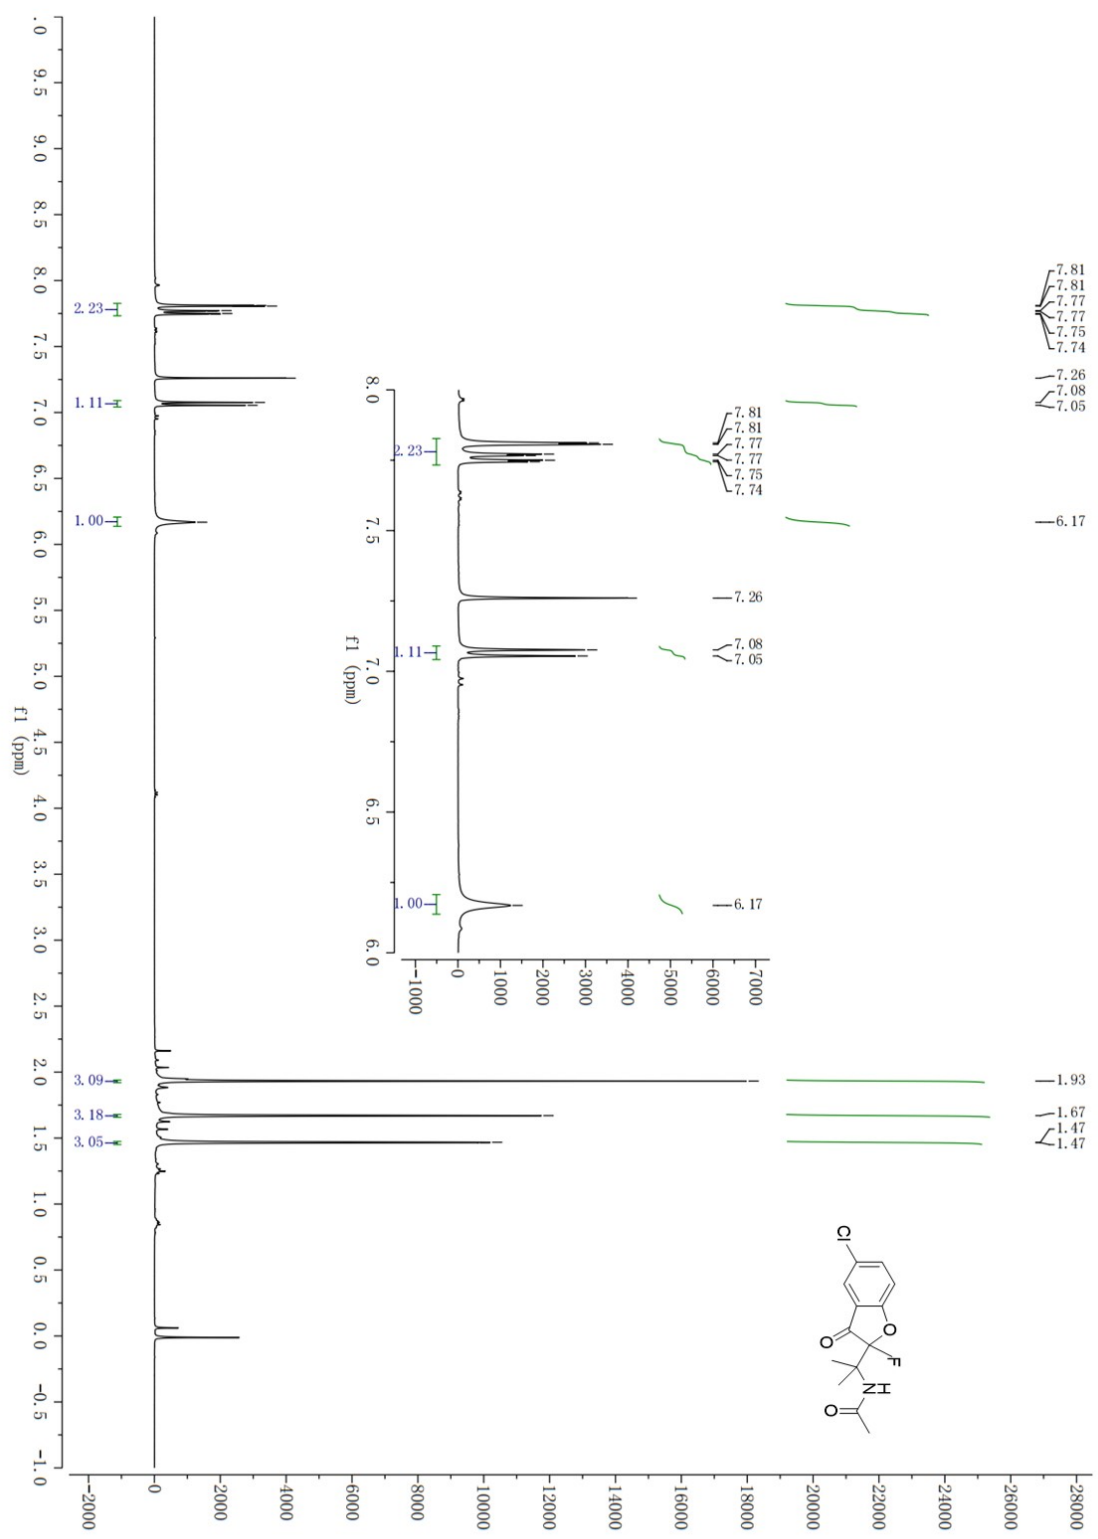

<sup>19</sup>F NMR

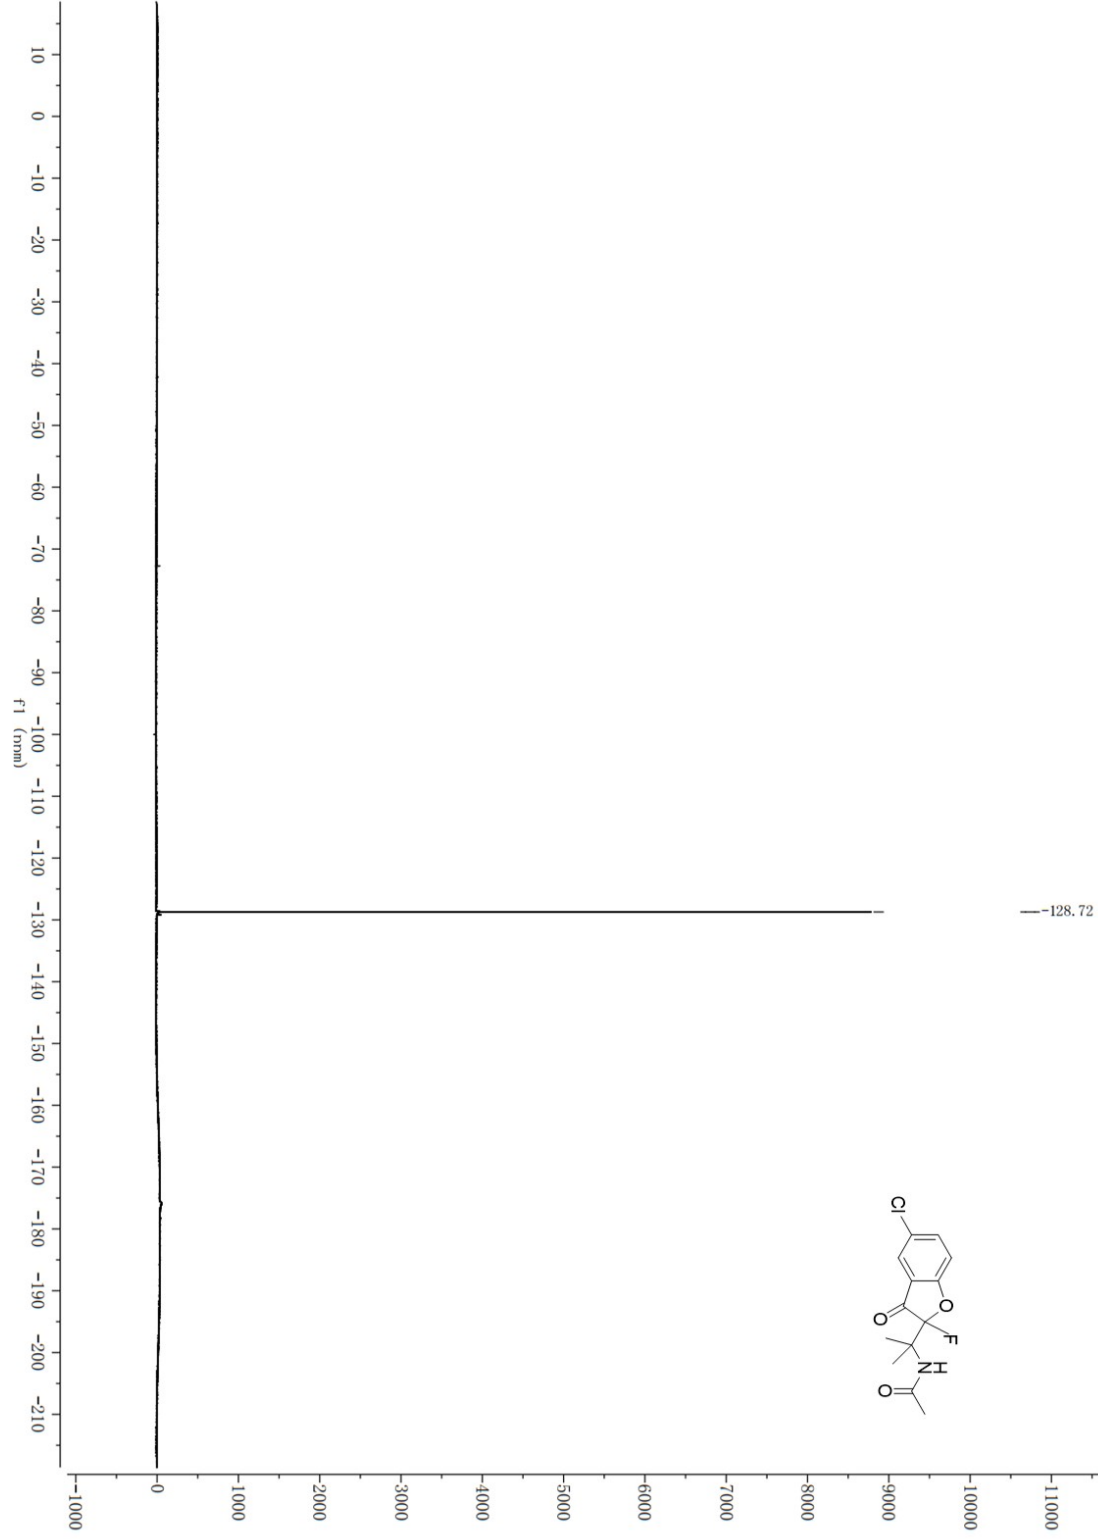



<sup>13</sup>C NMR

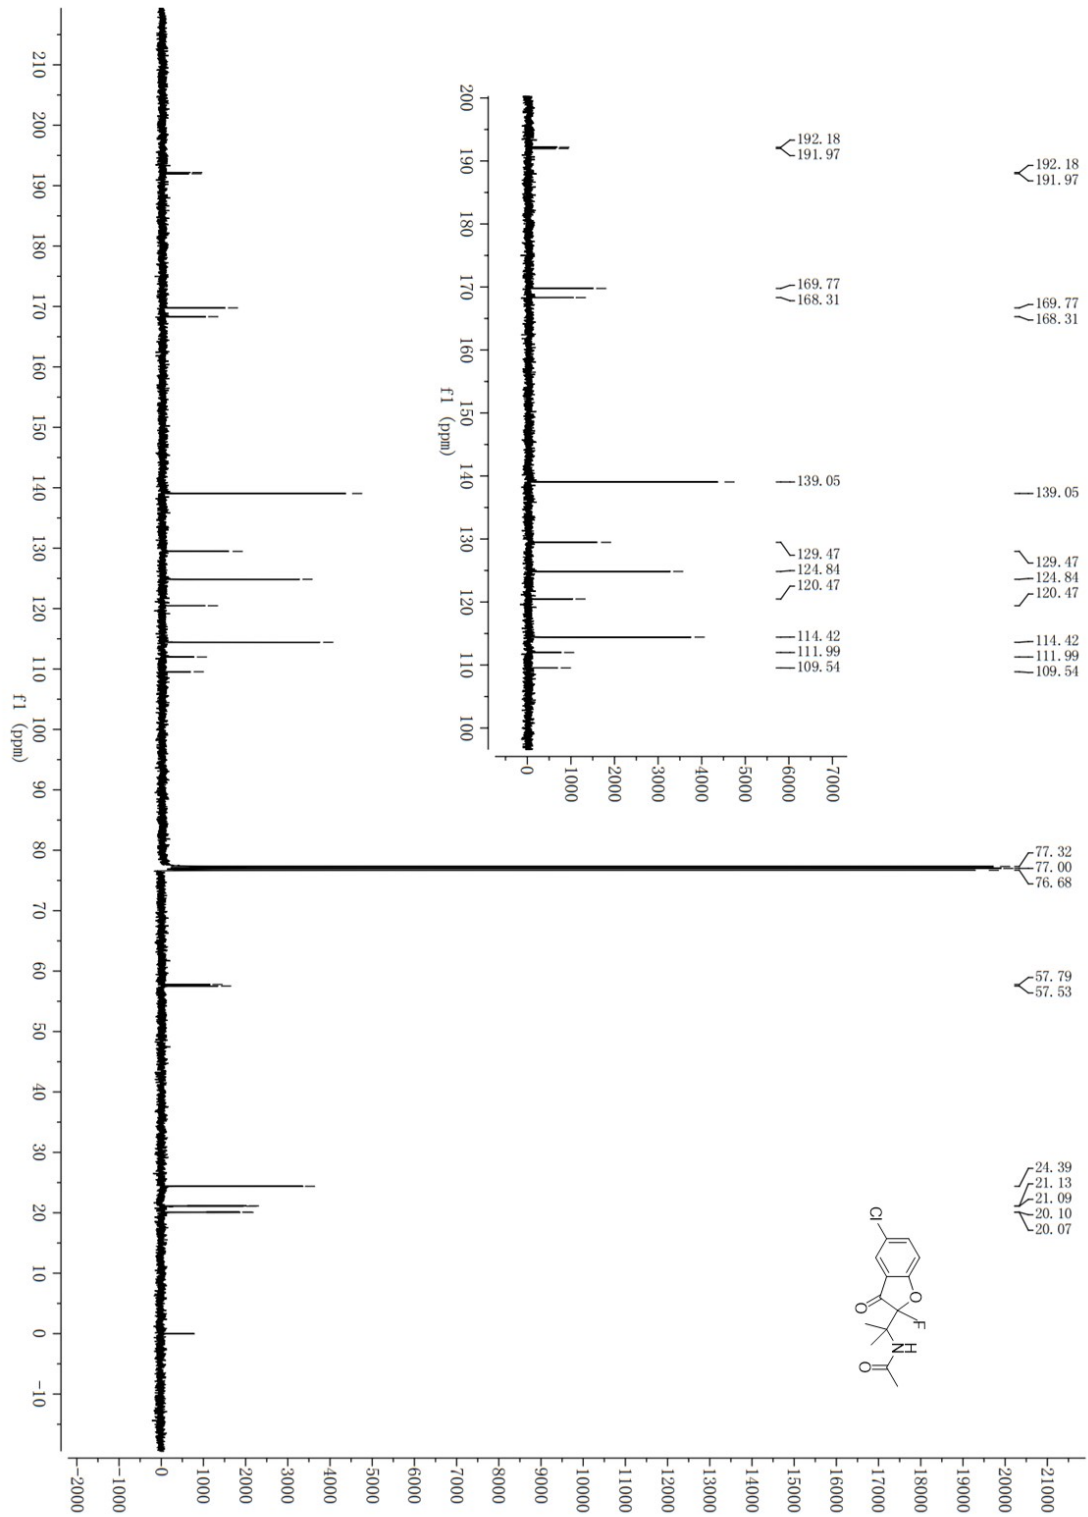

**(2m)**  
<sup>1</sup>H NMR

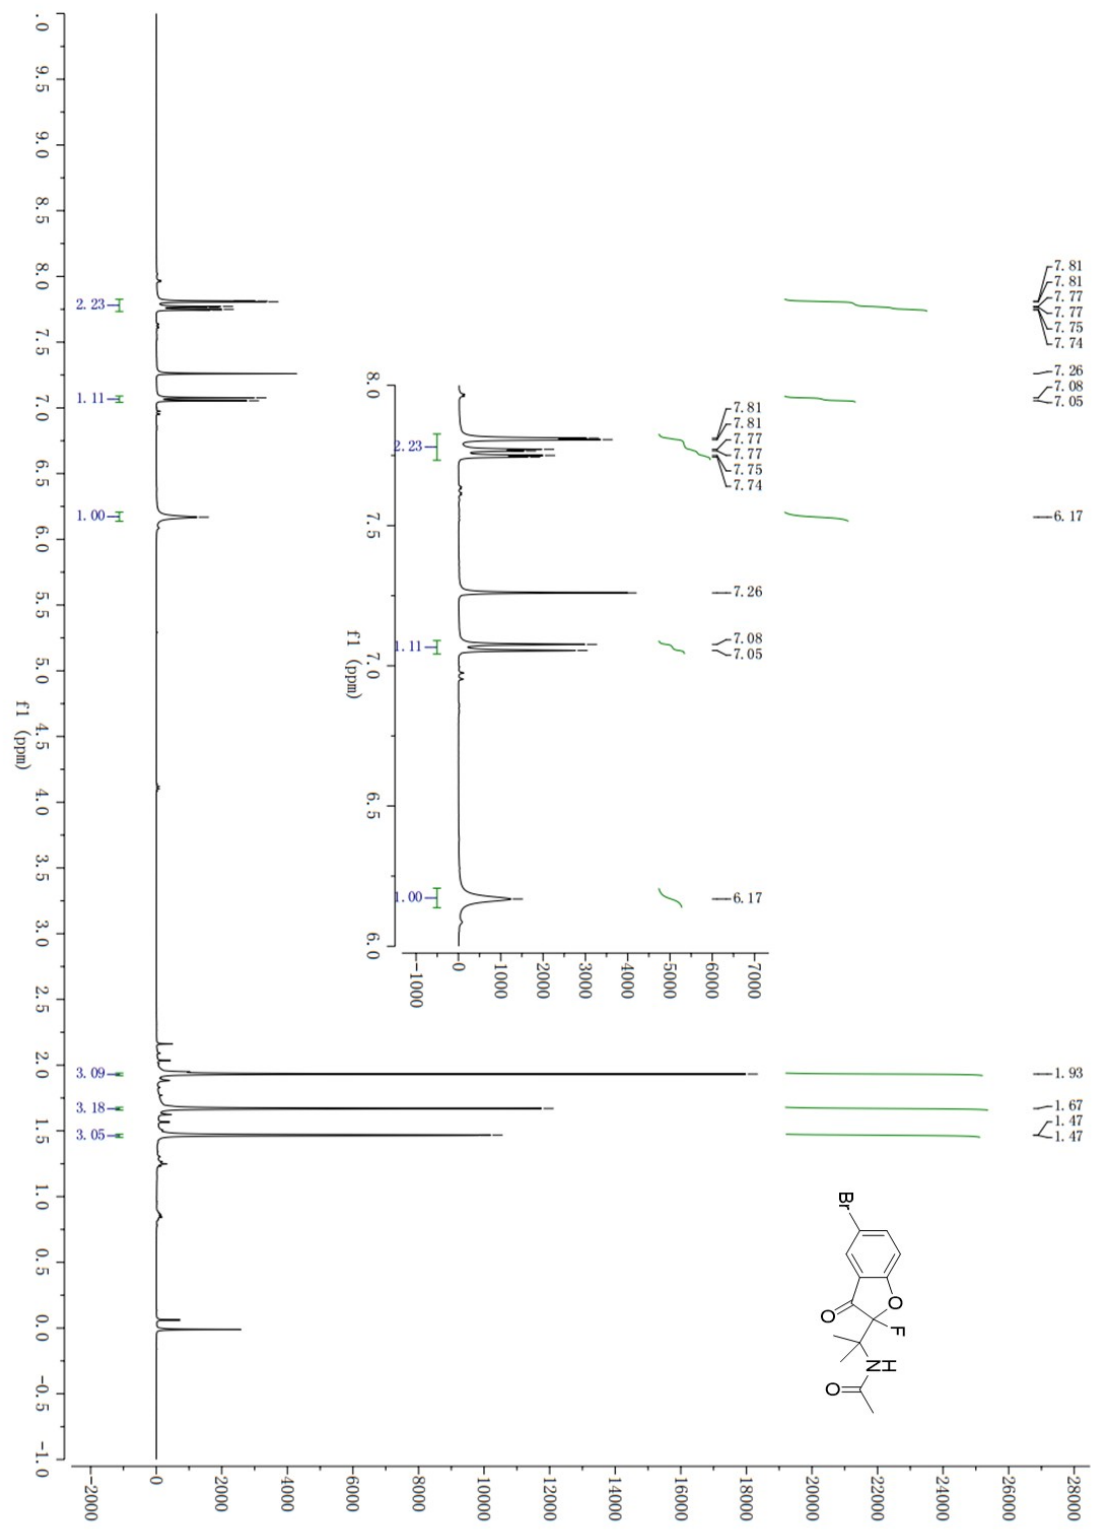

<sup>19</sup>F NMR

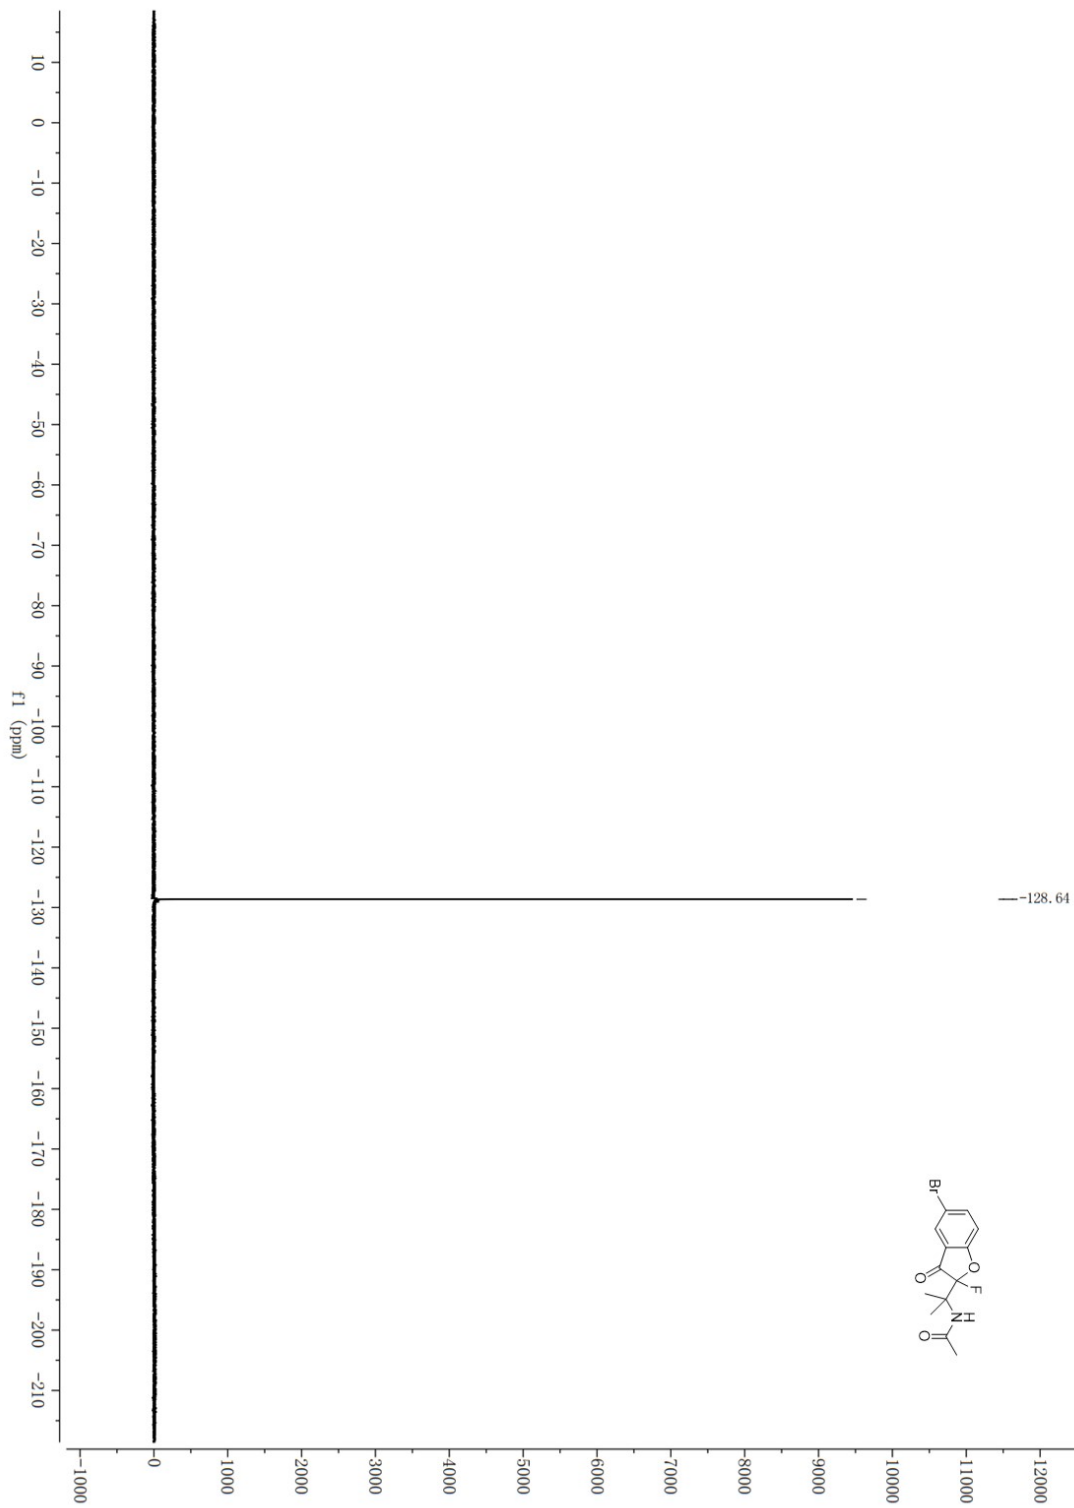

<sup>13</sup>C NMR

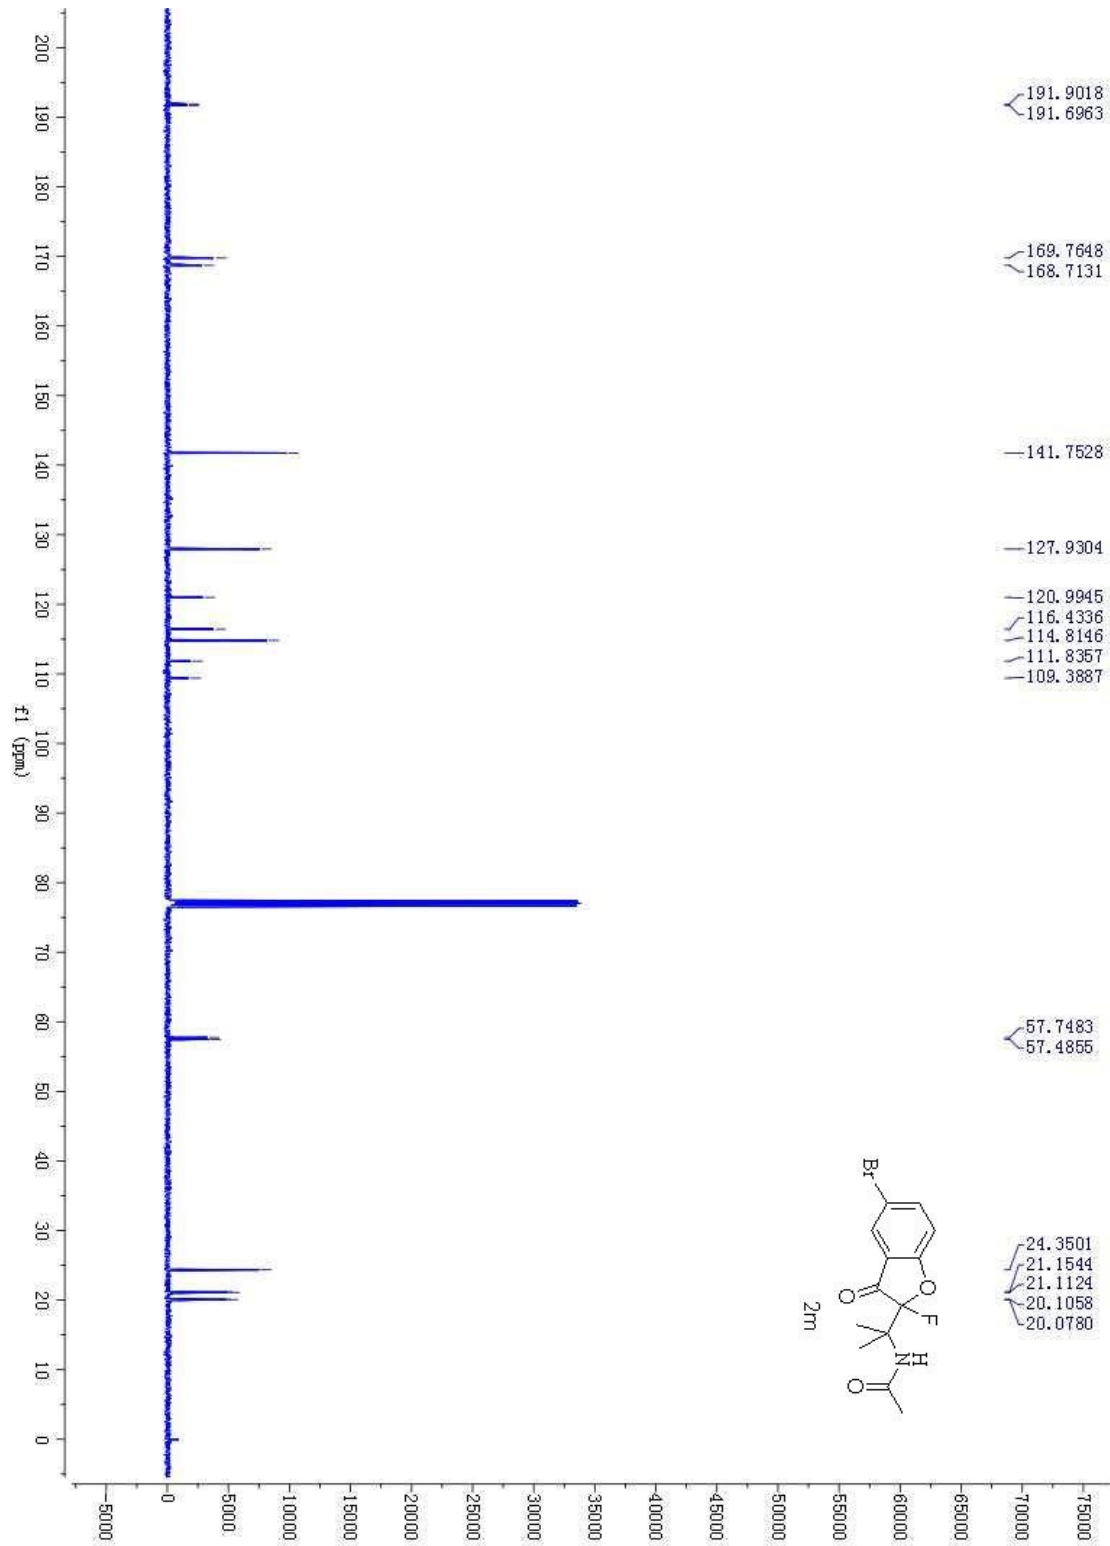

**(2n)**  
<sup>1</sup>H NMR

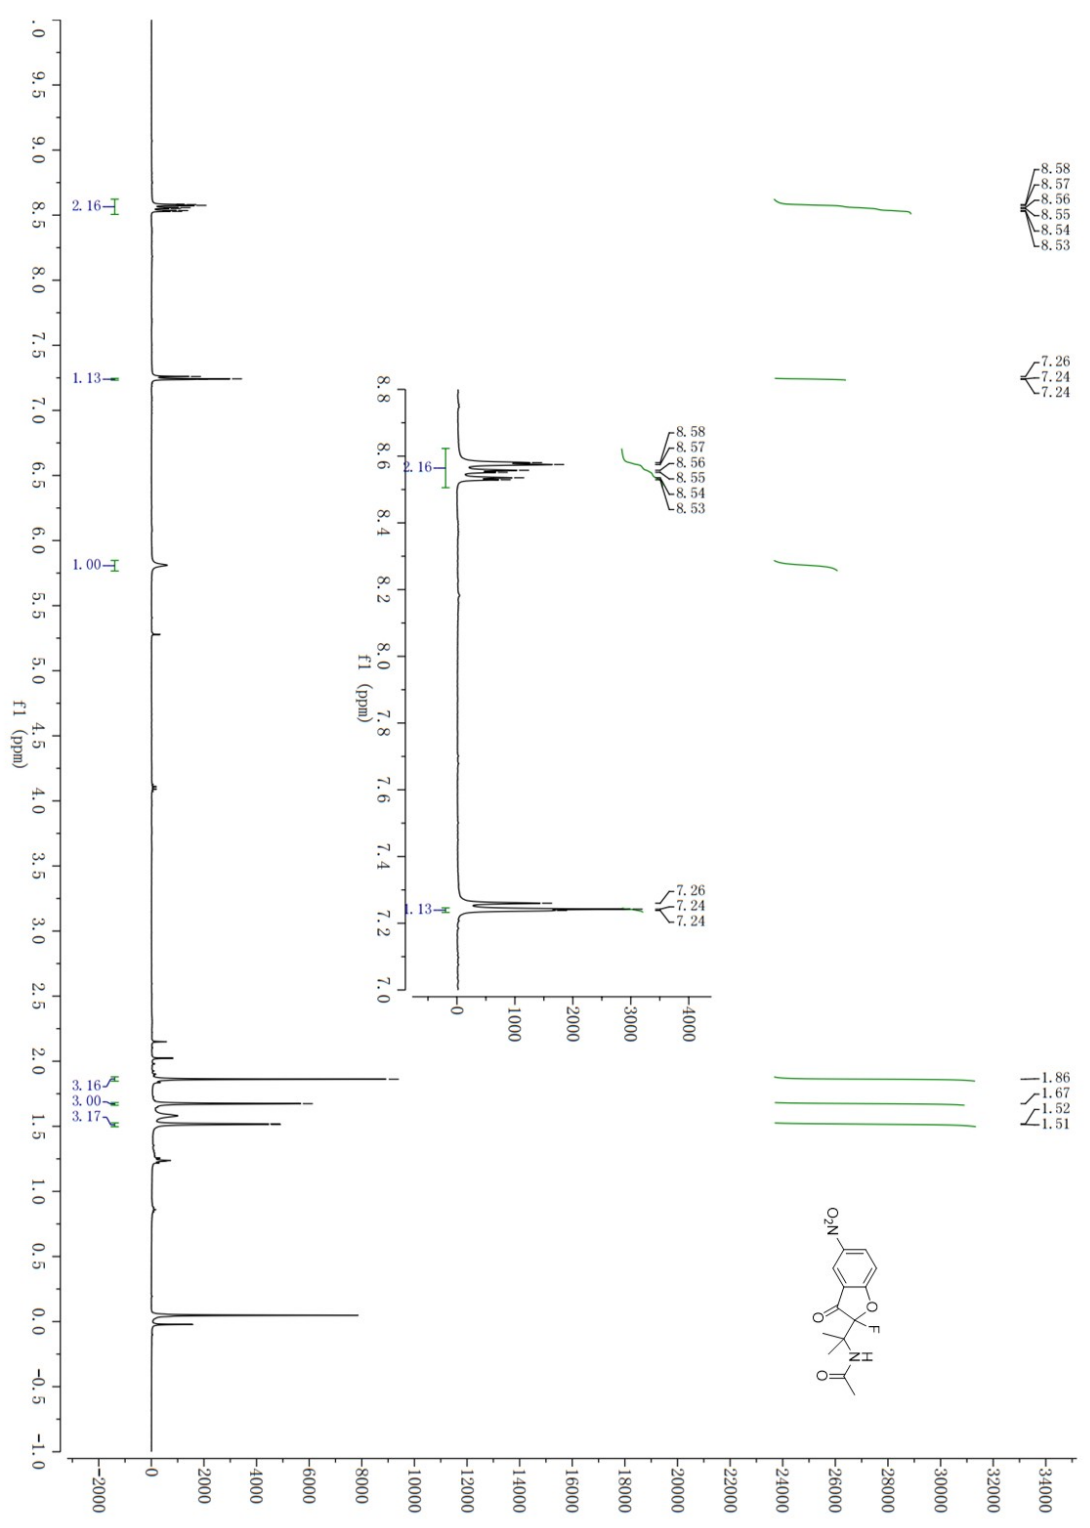

$^{19}\text{F}$  NMR

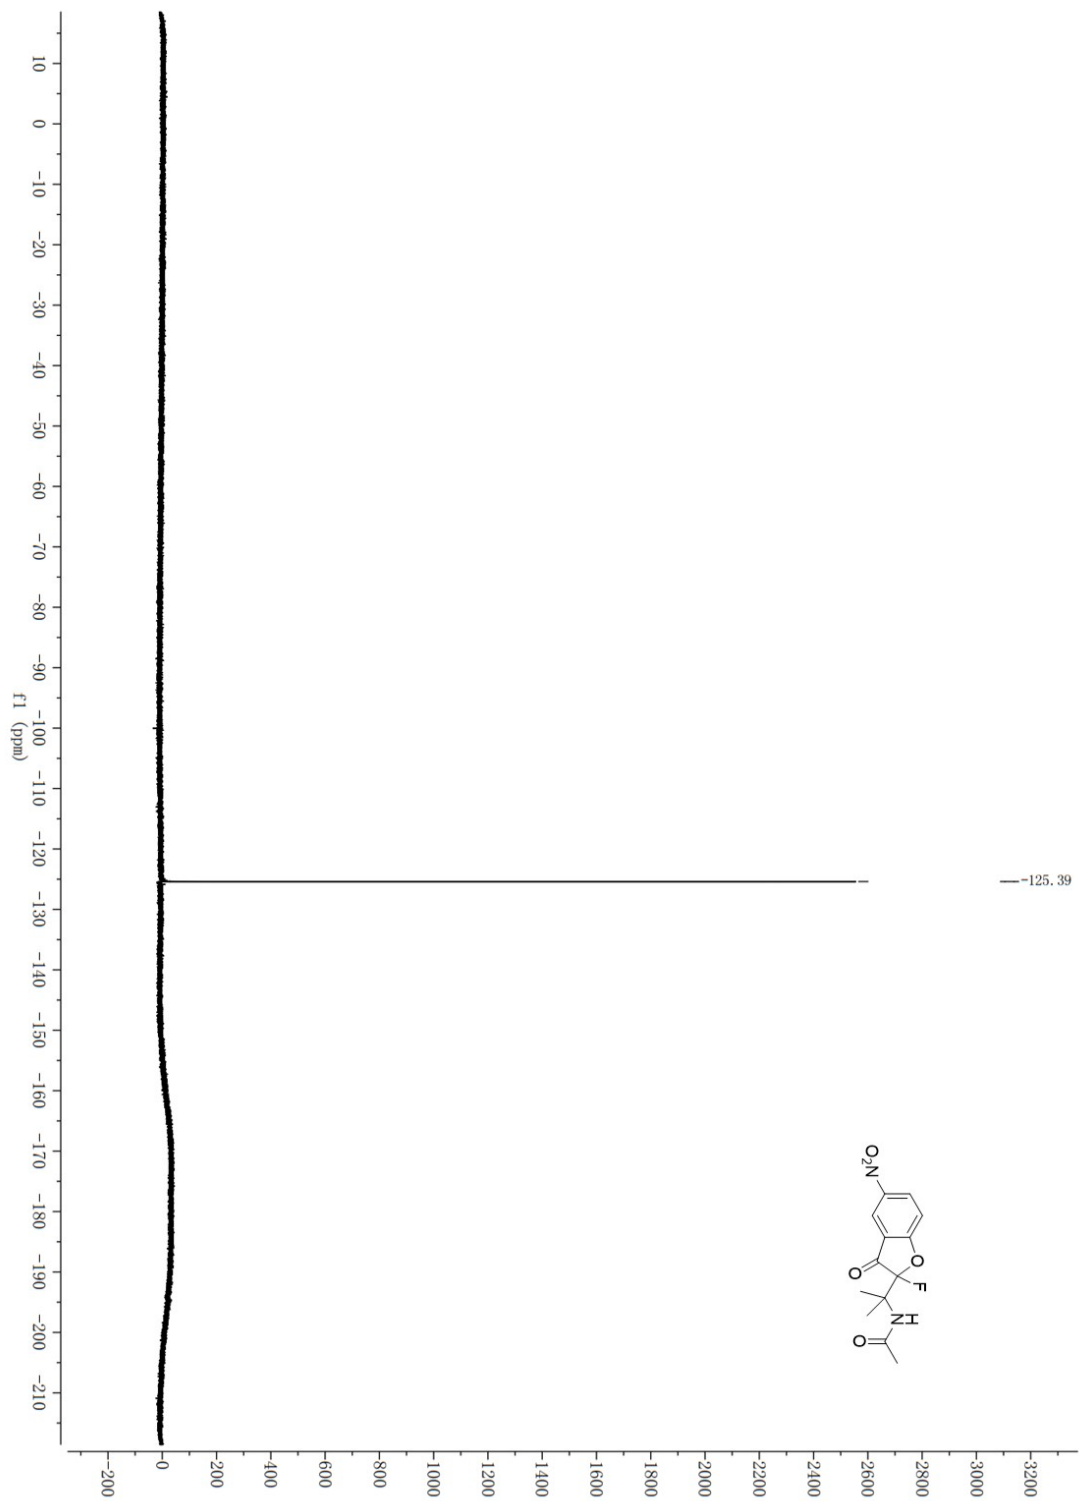

<sup>13</sup>C NMR

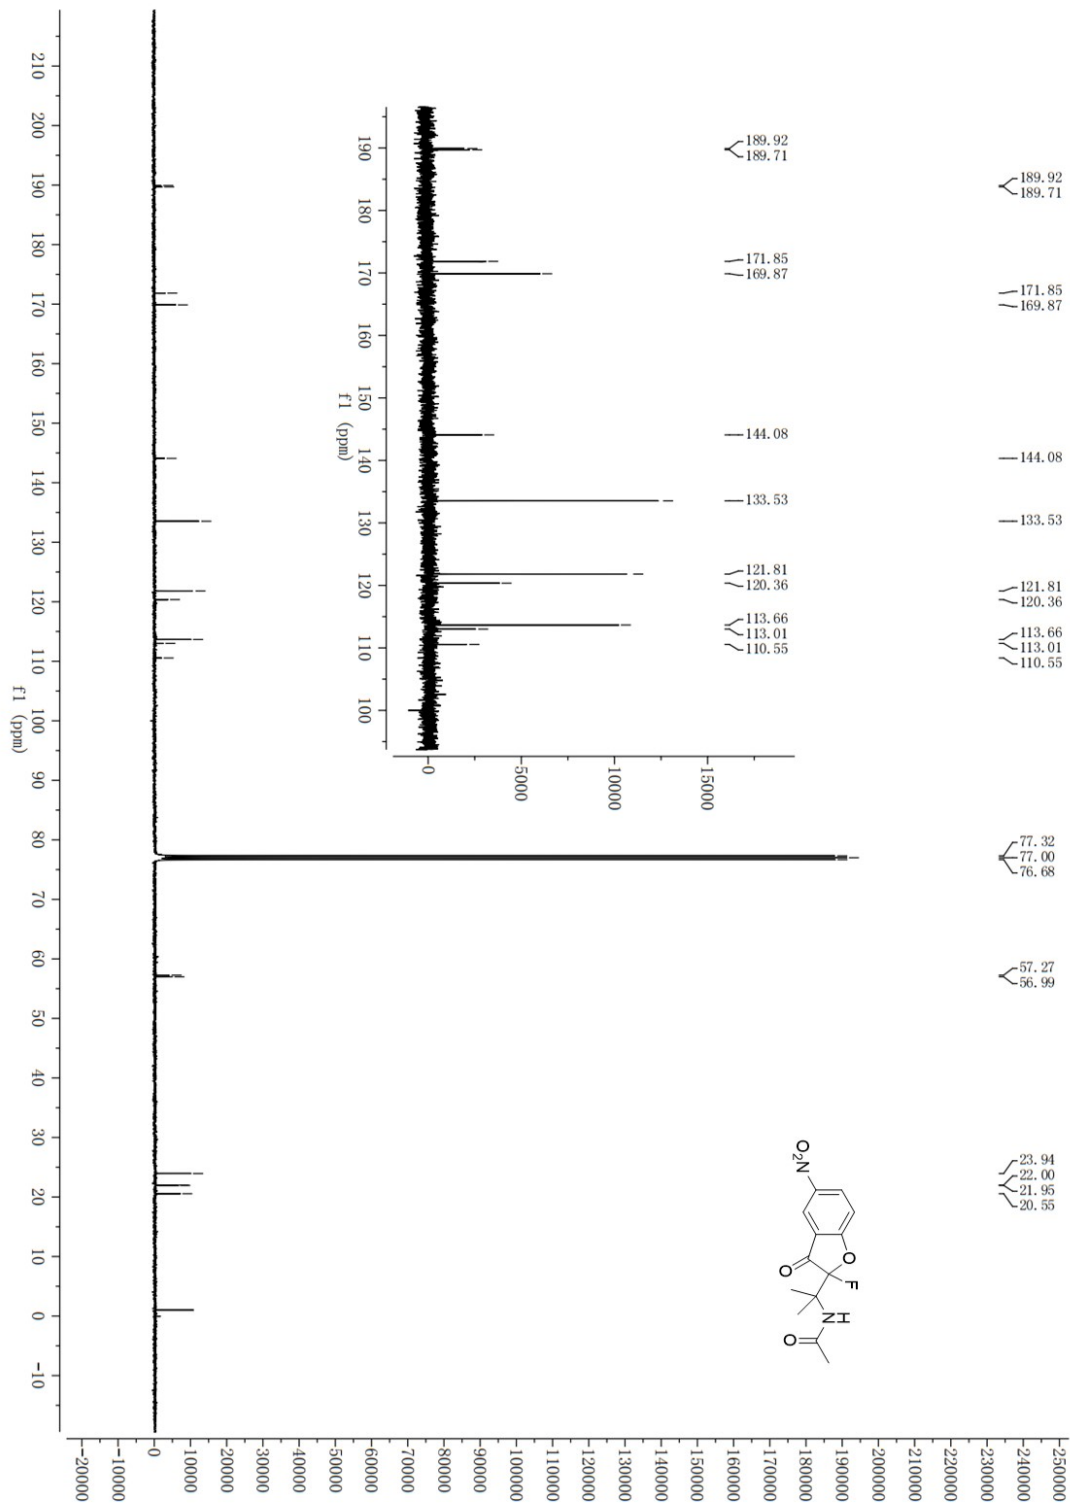

(20)  
<sup>1</sup>H NMR

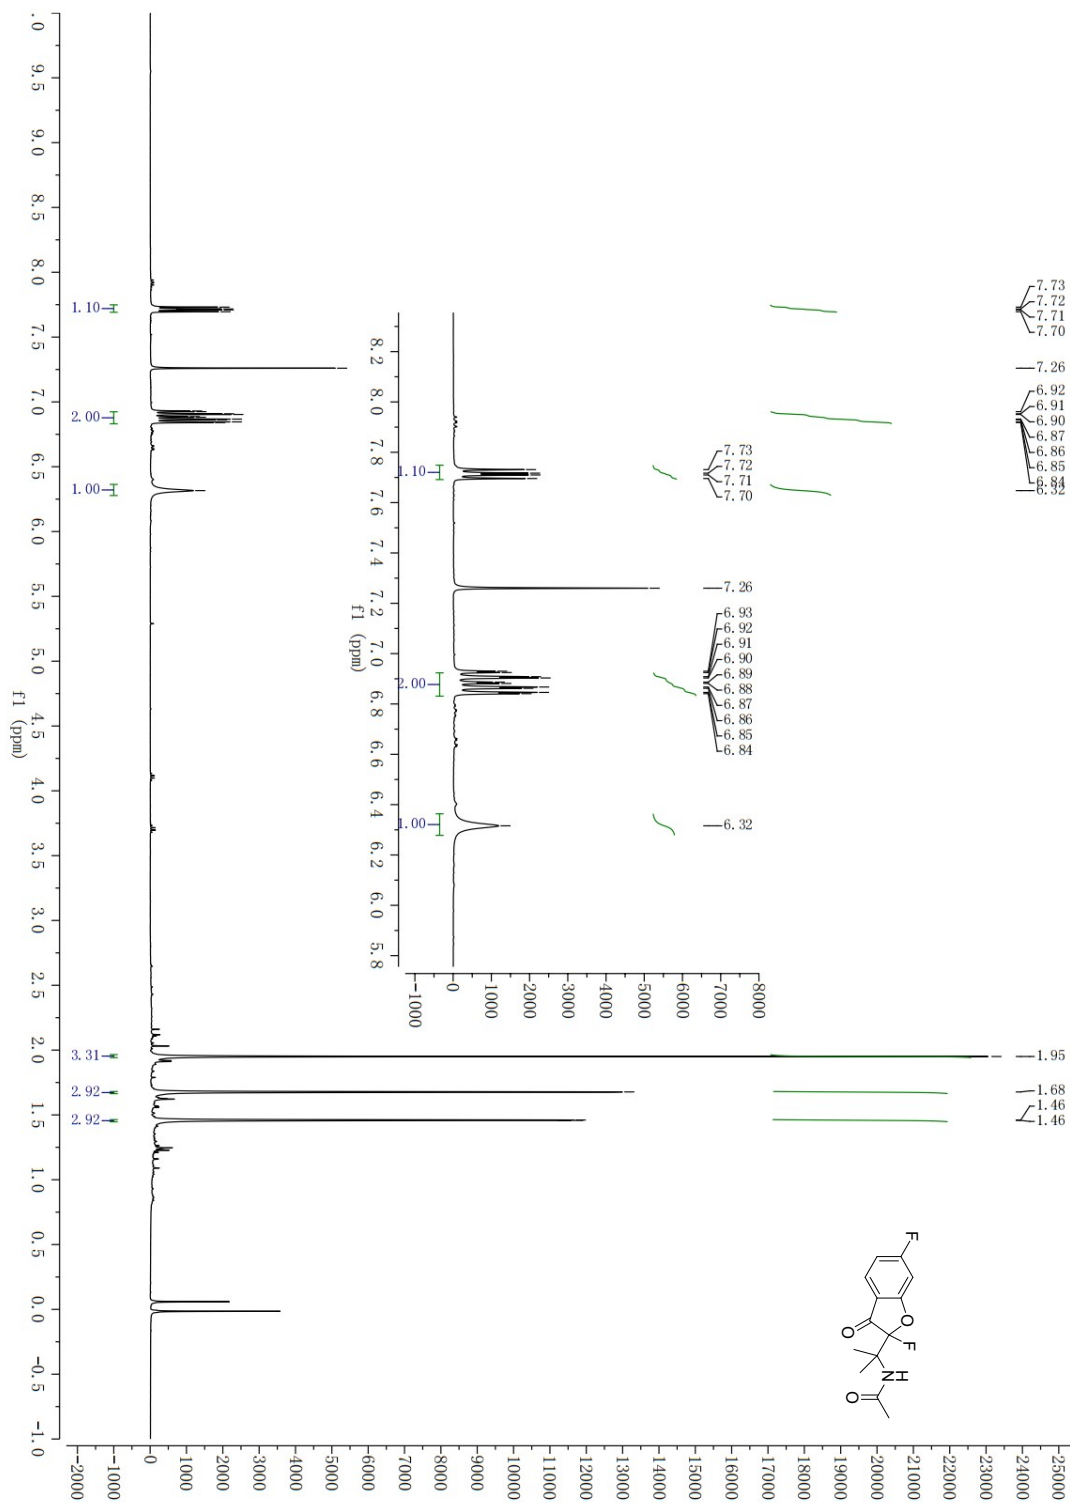



$^{19}\text{F}$  NMR

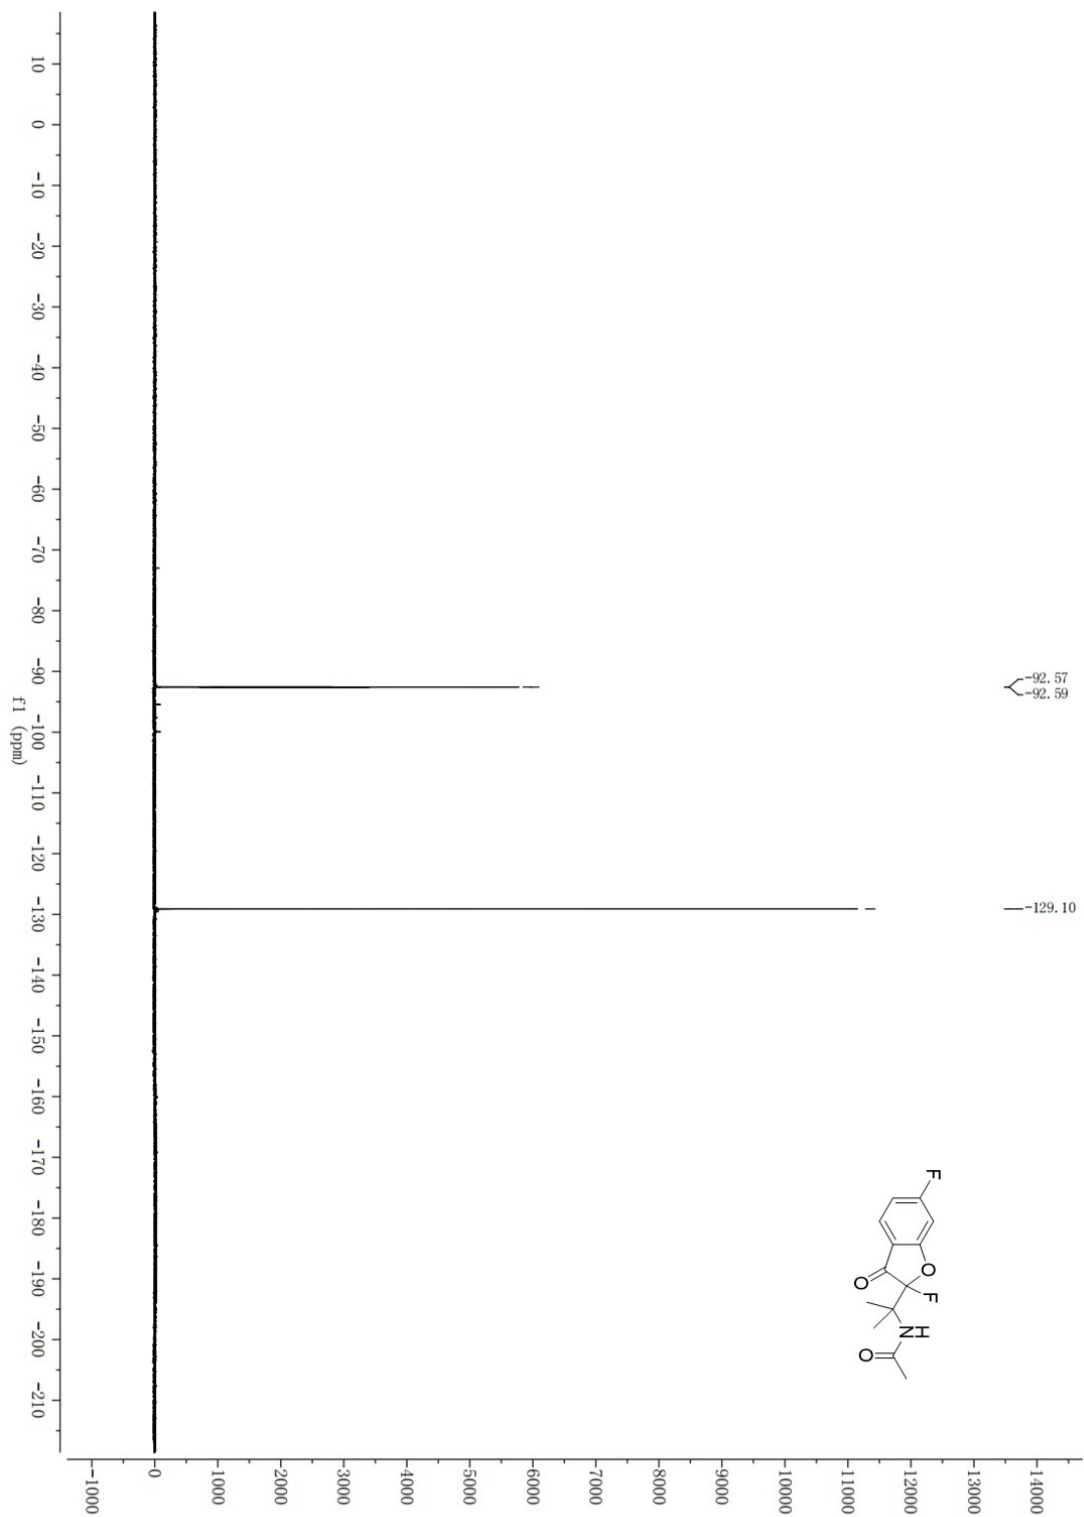

<sup>13</sup>C NMR

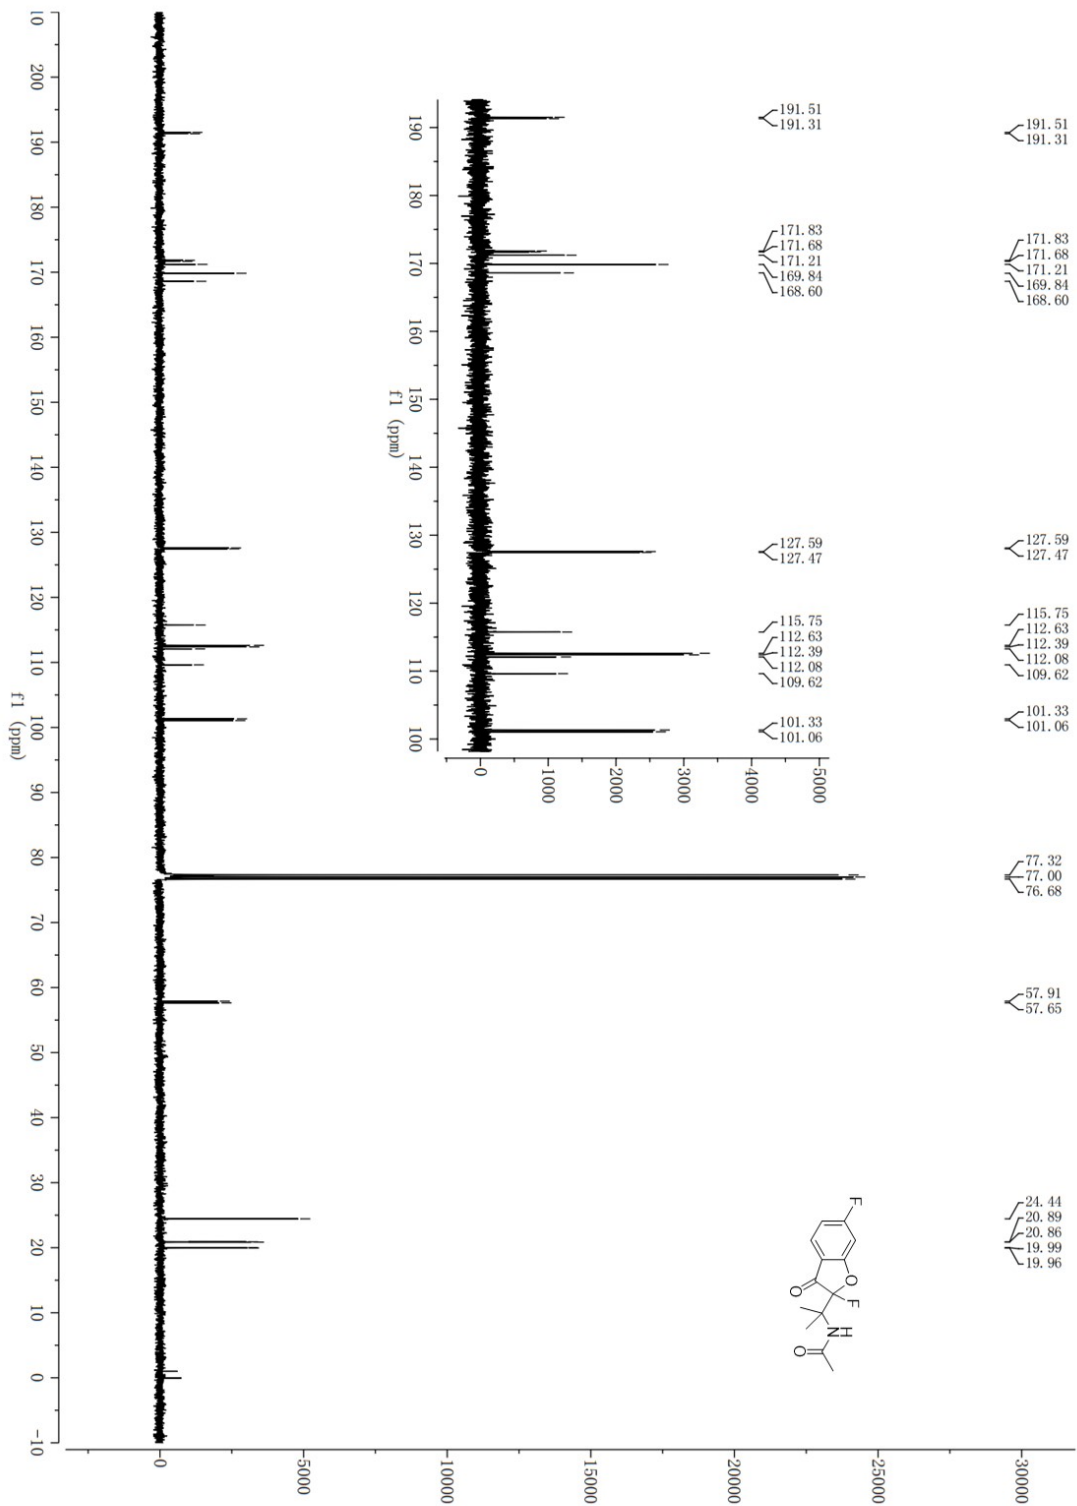

**(2p)**  
<sup>1</sup>H NMR

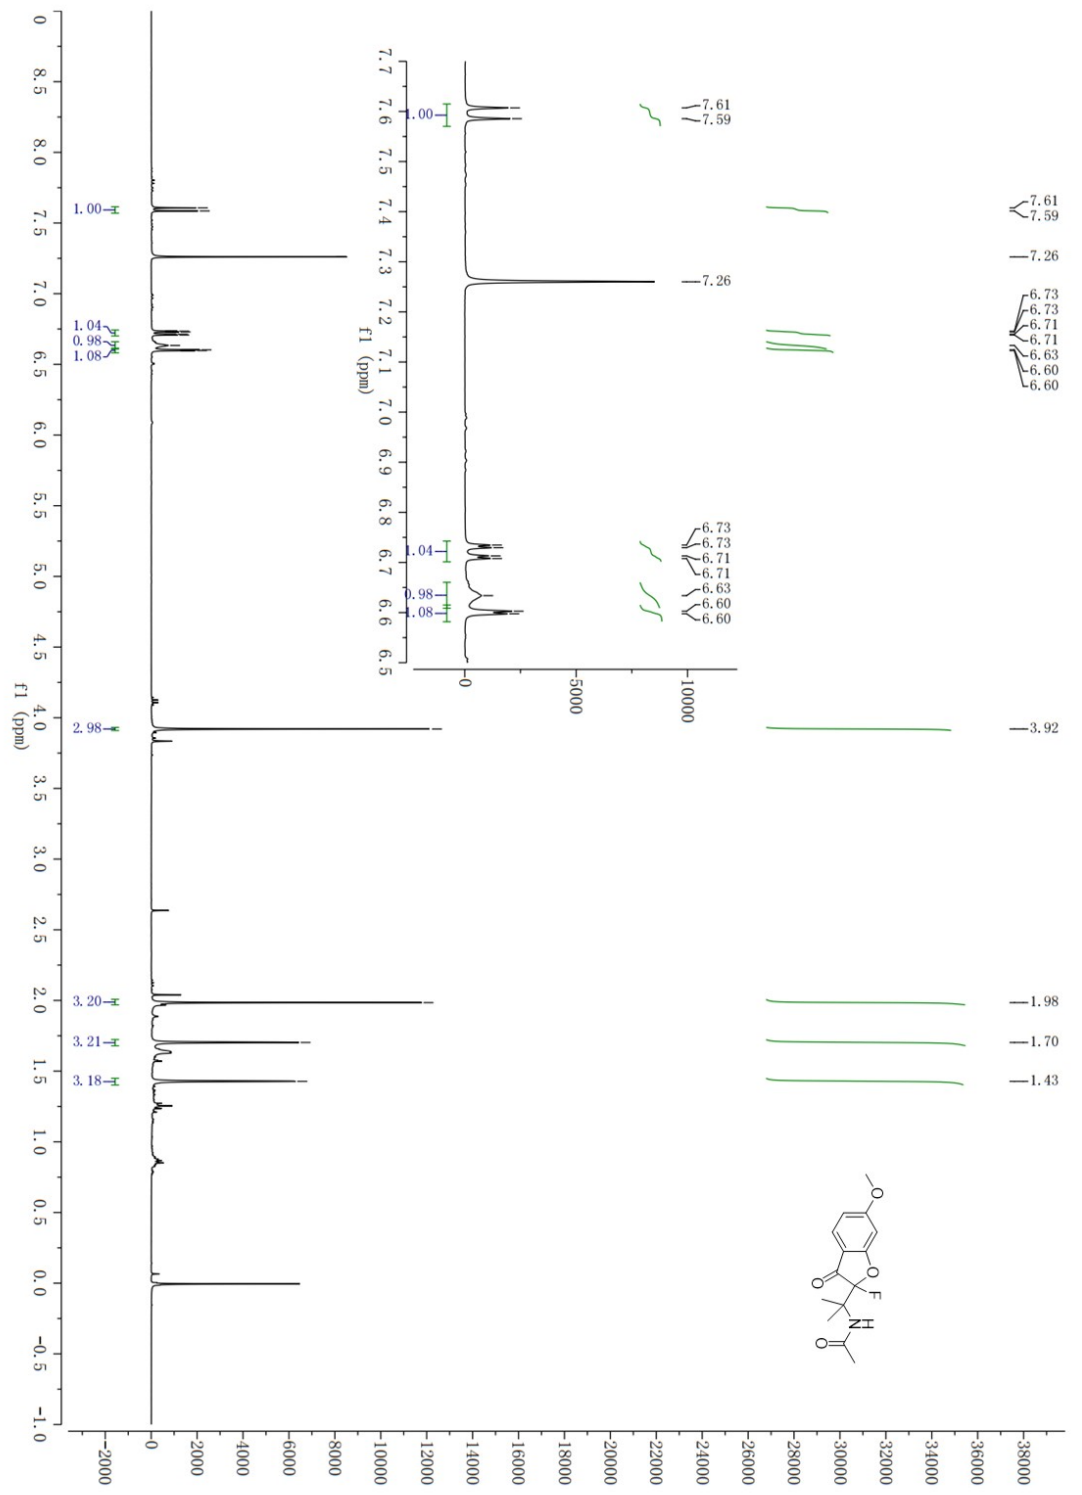

<sup>19</sup>F NMR

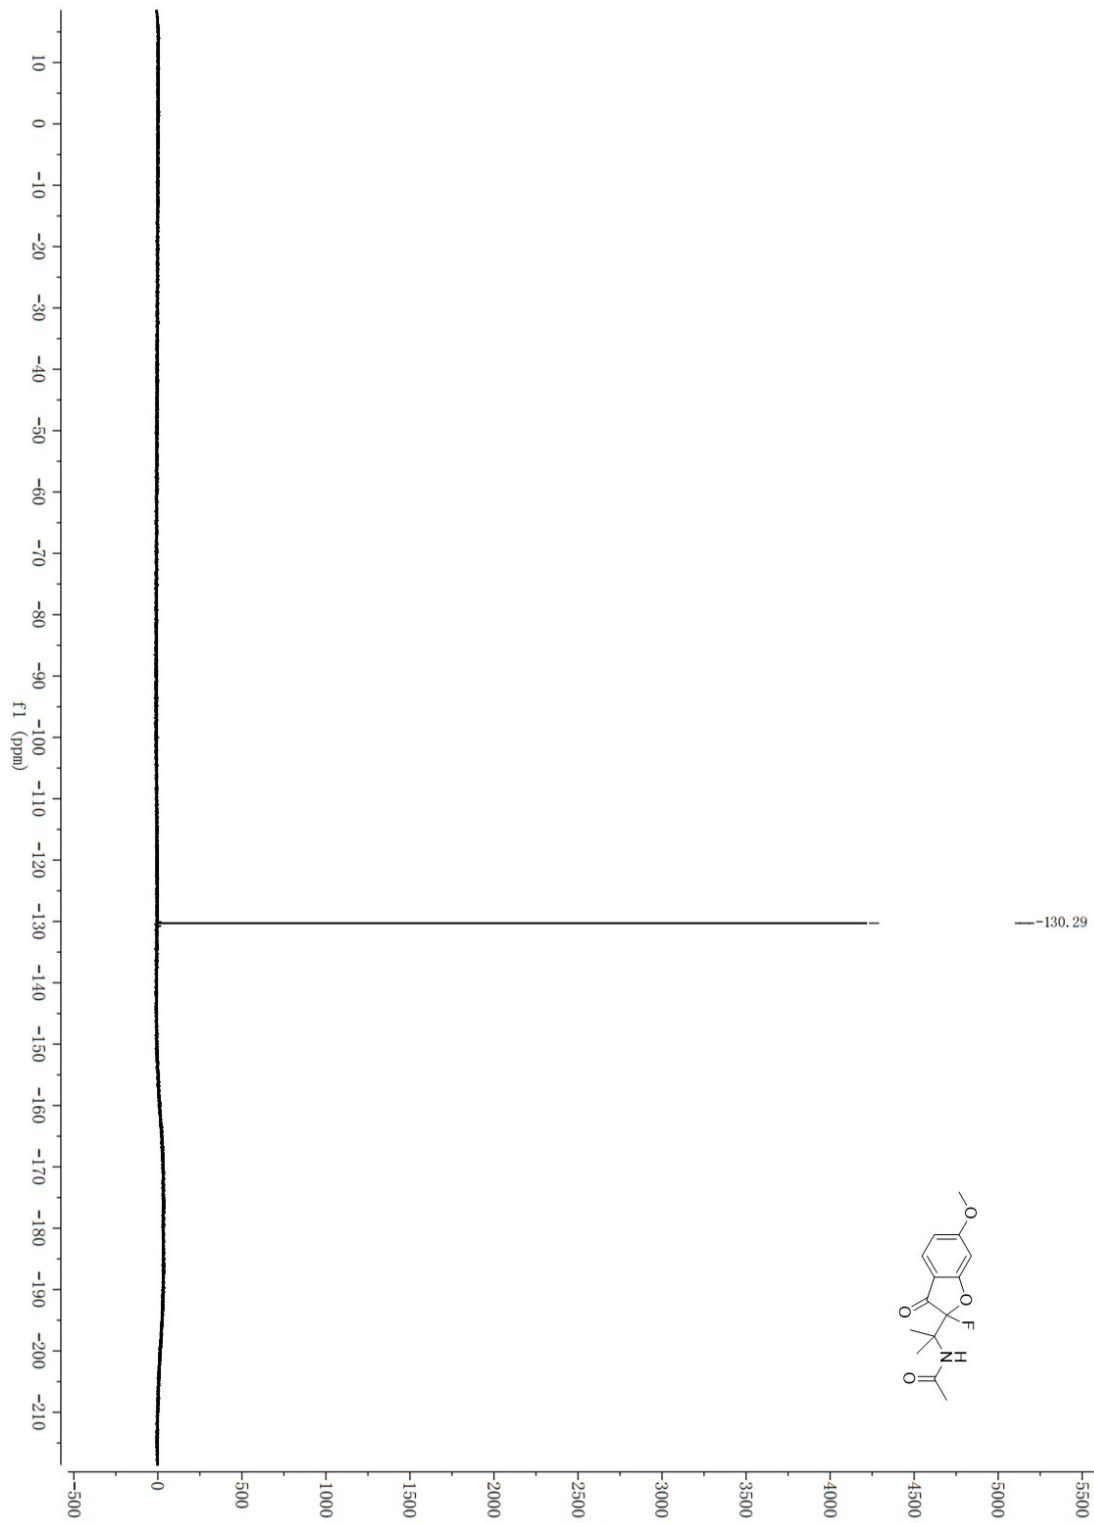

<sup>13</sup>C NMR

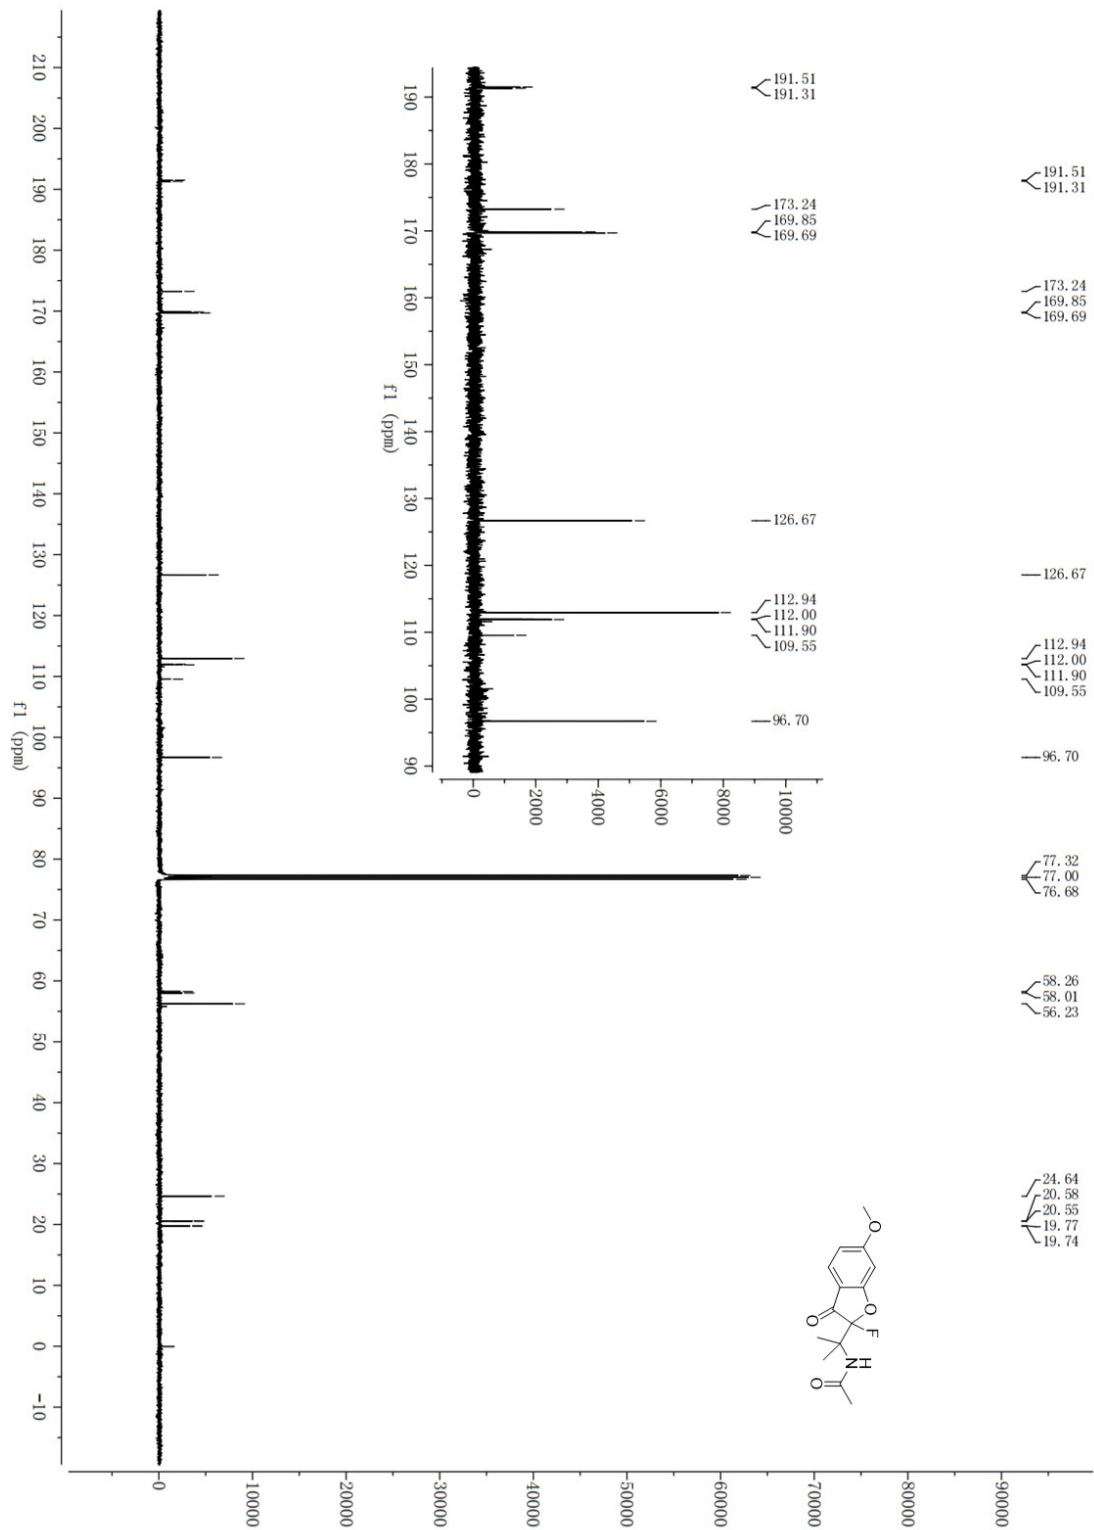

## References

- [1] Baum, J.S.; Shook, D.A.; Davies, H.M.L.; Smith, H.D. *Synth. Commun.*, **1987**, *17*(14), 1709-1716.
- [2] M. Xiao, F. Zhang, Z. Du and B. Ma, *Adv. Synth. Catal.*, 2018, **360**, 911-916.
- [3] J. Gong, Z. Zhao, F. Zhang, S. Wu, G. Yan, Y. Quan, B. Ma, *Org. Lett.*, 16 (2014) 5524-5527.
- [4] Margetic, D, Trošelj, P, Ishikawa, T, Kumamoto, T. *Bull. Chem. Soc. Jpn.* 2010, **83**, 1055-1057.
